# Supplementary material
Source: PubMed Central journal article supplement (PMC3388902)

# The Tandem of Full Spin Analysis and qHNMR for the Quality Control of Botanicals Exemplified with *Ginkgo biloba*

José G. Napolitano, Tanja Gödecke, María F. Rodríguez-Brasco, Birgit U. Jaki, Shao-Nong Chen, David C. Lankin, and Guido F. Pauli\*

Institute for Tuberculosis Research and Department of Medicinal Chemistry and Pharmacognosy, College of Pharmacy, University of Illinois at Chicago, Chicago, IL 60612, U.S.A.

## ■ Supporting Information

## TABLE OF CONTENT

|                                                                                                                                 | <i>page</i> |
|---------------------------------------------------------------------------------------------------------------------------------|-------------|
| <b>S1.</b> The <sup>1</sup> H Fingerprint of Ginkgolide A ( <b>1</b> ) in the PERCH .PMS file format.                           | <i>S4</i>   |
| <b>S2.</b> <sup>1</sup> H NMR spectrum of Ginkgolide A ( <b>1</b> , DMSO- <i>d</i> <sub>6</sub> , 600 MHz).                     | <i>S5</i>   |
| <b>S3.</b> <sup>1</sup> H, <sup>1</sup> H-COSY experiment of Ginkgolide A ( <b>1</b> , DMSO- <i>d</i> <sub>6</sub> , 600 MHz).  | <i>S6</i>   |
| <b>S4.</b> The <sup>1</sup> H Fingerprint of Ginkgolide B ( <b>2</b> ) in the PERCH .PMS file format.                           | <i>S7</i>   |
| <b>S5.</b> <sup>1</sup> H NMR spectrum of Ginkgolide B ( <b>2</b> , DMSO- <i>d</i> <sub>6</sub> , 600 MHz).                     | <i>S8</i>   |
| <b>S6.</b> <sup>1</sup> H, <sup>1</sup> H-COSY experiment of Ginkgolide B ( <b>2</b> , DMSO- <i>d</i> <sub>6</sub> , 600 MHz).  | <i>S9</i>   |
| <b>S7.</b> The <sup>1</sup> H Fingerprint of Ginkgolide C ( <b>3</b> ) in the PERCH .PMS file format.                           | <i>S10</i>  |
| <b>S8.</b> <sup>1</sup> H NMR spectrum of Ginkgolide C ( <b>3</b> , DMSO- <i>d</i> <sub>6</sub> , 600 MHz).                     | <i>S11</i>  |
| <b>S9.</b> <sup>1</sup> H, <sup>1</sup> H-COSY experiment of Ginkgolide C ( <b>3</b> , DMSO- <i>d</i> <sub>6</sub> , 600 MHz).  | <i>S12</i>  |
| <b>S10.</b> The <sup>1</sup> H Fingerprint of Ginkgolide J ( <b>4</b> ) in the PERCH .PMS file format.                          | <i>S13</i>  |
| <b>S11.</b> <sup>1</sup> H NMR spectrum of Ginkgolide J ( <b>4</b> , DMSO- <i>d</i> <sub>6</sub> , 600 MHz).                    | <i>S14</i>  |
| <b>S12.</b> <sup>1</sup> H, <sup>1</sup> H-COSY experiment of Ginkgolide J ( <b>4</b> , DMSO- <i>d</i> <sub>6</sub> , 600 MHz). | <i>S15</i>  |
| <b>S13.</b> The <sup>1</sup> H Fingerprint of Bilobalide ( <b>5</b> ) in the PERCH .PMS file format.                            | <i>S16</i>  |
| <b>S14.</b> <sup>1</sup> H NMR spectrum of Bilobalide ( <b>5</b> , DMSO- <i>d</i> <sub>6</sub> , 600 MHz).                      | <i>S17</i>  |
| <b>S15.</b> <sup>1</sup> H, <sup>1</sup> H-COSY experiment of Bilobalide ( <b>5</b> , DMSO- <i>d</i> <sub>6</sub> , 600 MHz).   | <i>S18</i>  |
| <b>S16.</b> The <sup>1</sup> H Fingerprint of Quercetin ( <b>6</b> ) in the PERCH .PMS file format.                             | <i>S19</i>  |
| <b>S17.</b> <sup>1</sup> H NMR spectrum of Quercetin ( <b>6</b> , DMSO- <i>d</i> <sub>6</sub> , 600 MHz).                       | <i>S20</i>  |
| <b>S18.</b> <sup>1</sup> H, <sup>1</sup> H-COSY experiment of Quercetin ( <b>6</b> , DMSO- <i>d</i> <sub>6</sub> , 600 MHz).    | <i>S21</i>  |
| <b>S19.</b> The <sup>1</sup> H Fingerprint of Kaempferol ( <b>7</b> ) in the PERCH .PMS file format.                            | <i>S22</i>  |
| <b>S20.</b> <sup>1</sup> H NMR spectrum of Kaempferol ( <b>7</b> , DMSO- <i>d</i> <sub>6</sub> , 600 MHz).                      | <i>S23</i>  |
| <b>S21.</b> <sup>1</sup> H, <sup>1</sup> H-COSY experiment of Kaempferol ( <b>7</b> , DMSO- <i>d</i> <sub>6</sub> , 600 MHz).   | <i>S24</i>  |
| <b>S22.</b> The <sup>1</sup> H Fingerprint of Isorhamnetin ( <b>8</b> ) in the PERCH .PMS file format.                          | <i>S25</i>  |
| <b>S23.</b> <sup>1</sup> H NMR spectrum of Isorhamnetin ( <b>8</b> , DMSO- <i>d</i> <sub>6</sub> , 600 MHz).                    | <i>S26</i>  |
| <b>S24.</b> <sup>1</sup> H, <sup>1</sup> H-COSY experiment of Isorhamnetin ( <b>8</b> , DMSO- <i>d</i> <sub>6</sub> , 600 MHz). | <i>S27</i>  |
| <b>S25.</b> The <sup>1</sup> H Fingerprint of Rutin ( <b>9</b> ) in the PERCH .PMS file format.                                 | <i>S28</i>  |
| <b>S26.</b> <sup>1</sup> H NMR spectrum of Rutin ( <b>9</b> , DMSO- <i>d</i> <sub>6</sub> , 600 MHz).                           | <i>S29</i>  |
| <b>S27.</b> <sup>1</sup> H, <sup>1</sup> H-COSY experiment of Rutin ( <b>9</b> , DMSO- <i>d</i> <sub>6</sub> , 600 MHz).        | <i>S30</i>  |

- S28.** Combined  $^1\text{H}$  Fingerprints of nine *Ginkgo biloba* constituents (**1-9**) in the PERCH .PMS file format. S31
- S29.** Calibration of residual solvent signals using primary reference standards of  $\text{DMSO}_2$  and caffeine as internal calibrants. (A) qHNMR spectra of stock solutions of caffeine and  $\text{DMSO}_2$  in  $\text{DMSO-}d_6$  (600 MHz). (B) Calibration curves for the determination of residual  $\text{DMSO-}d_5$  content in  $\text{DMSO-}d_6$  lot B. S34
- S30.** The qHNMR analysis of a ginkgolide B reference material ( $\text{DMSO-}d_6$ , 600 MHz).  $\text{DMSO}_2$  was used as Internal Standard (IS) for quantitative calibration. Using qHNMR, ginkgolide A was readily detected as a very minor (0.43 %) impurity, present at an abundance level where intensities/integrals are comparable to those of  $^{13}\text{C}$  satellite signals of the major component (see also reference #17 in the main text). S35
- S31.** (A) Weight percentage of compounds **1-9** in six Ginkgo samples according to qHNMR measurements. (B) Variability of selected botanical markers in commercially available *Ginkgo biloba* preparations, expressed as deviation (y-axis, in %) from the *average* percent content (set to 0% deviation, dotted line) of each of the compounds, **1-9**. S36
- S32.** The effect of random noise on iterative fitting with PERCH in qHNMR analysis. (A) Sections of the qHNMR spectra of caffeine ( $\text{DMSO-}d_6$ , 600 MHz), showing the olefinic proton signals ( $\delta_{\text{H}}$  8.01 ppm). The six qHNMR spectra were acquired using a different number of scans to reach the indicated signal-to-noise ratio (S/N) values. (B) Fitting of the signals of the olefinic proton of caffeine at the various S/N levels shown in A: comparison of experimental (*Exp*) and calculated (*Calc*) qHNMR spectra. While the root mean square (RMS) deviations for the iterative fits increase with decreasing S/N, the errors always remain <0.1%, even at a S/N level of ~11:1. S37

## S1. The <sup>1</sup>H Fingerprint of Ginkgolide A (1) in the PERCH .PMS file format.

\* NEW: the lines beginning by \* are comment lines !  
\* To keep all the chemical shifts fixed during iteration  
\* replace "CHEMICAL SHIFTS (HZ):" by ".SHIFTS(HZ): fixed"  
\* The couplings can be fixed in the same way

NMR-data: C:\Users\jgnapo\_2\Documents\jgnapo\perch\Ginkgolides\GA\ginkgoa  
#Date 9. 3.2011; Time 17: 5:18 ginkgoa.5TH

CHEMICAL SHIFTS (PPM): Similarity% = 28.130

```
PROTON 2*SPIN= 1 SPECIES=1H POPULATION(Y)= 1.00000
OH-3 / 1 6.378972 1*1*1 STAT=Y PRED= 4.856 RANGE= 1.805 WIDTH(Y)= 1.273 RESP(Y)= 1.0000
OH-10 / 1 6.814323 1*1*1 STAT=Y PRED= 4.509 RANGE= 1.630 WIDTH(Y)= 1.565 RESP(Y)= 0.9632
H-7beta / 1 2.043863 1*1*1 STAT=Y PRED= 2.070 RANGE= 0.557 WIDTH(Y)= 2.501 RESP(Y)= 0.8989 HSQC= C14
H-1beta / 1 1.805711 1*1*1 STAT=Y PRED= 1.401 RANGE= 0.302 WIDTH(Y)= 1.882 RESP(Y)= 0.9213 HSQC= C8
H-1alpha / 1 2.750139 1*1*1 STAT=Y PRED= 2.169 RANGE= 0.387 WIDTH(Y)= 1.927 RESP(Y)= 0.9005 HSQC= C8
H-2 / 1 4.833738 1*1*1 STAT=Y PRED= 4.895 RANGE= 0.262 WIDTH(Y)= 1.798 RESP(Y)= 0.9709 HSQC= C9
H-6 / 1 4.945707 1*1*1 STAT=Y PRED= 4.760 RANGE= 0.247 WIDTH(Y)= 1.956 RESP(Y)= 0.9824 HSQC= C13
H-7alpha / 1 2.027505 1*1*1 STAT=Y PRED= 2.025 RANGE= 0.472 WIDTH(Y)= 2.358 RESP(Y)= 0.8736 HSQC= C14
H-8 / 1 1.710433 1*1*1 STAT=Y PRED= 1.700 RANGE= 0.222 WIDTH(Y)= 2.173 RESP(Y)= 0.9339 HSQC= C15
H-10 / 1 4.941390 1*1*1 STAT=Y PRED= 4.165 RANGE= 0.392 WIDTH(Y)= 1.780 RESP(Y)= 0.9248 HSQC= C17
H-12 / 1 6.023393 1*1*1 STAT=Y PRED= 5.659 RANGE= 0.335 WIDTH(Y)= 1.498 RESP(Y)= 0.9865 HSQC= C19
H-14 / 1 2.937891 1*1*1 STAT=Y PRED= 2.949 RANGE= 0.387 WIDTH(Y)= 1.519 RESP(Y)= 0.9493 HSQC= C21
H-16 / 1 1.117747 1*1*3 STAT=Y PRED= 1.114 RANGE= 0.252 WIDTH(Y)= 1.687 RESP(Y)= 0.9350 HSQC= C23
t-but / 1 1.017131 1*1*9 STAT=Y PRED= 0.928 RANGE= 0.227 WIDTH(Y)= 2.491 RESP(Y)= 0.9025 HSQC= C25-27
```

COUPLING CONSTANTS (HZ): Similarity% = 35.913

```
J6_29 5.1630 J OH-10 H-10 STAT=Y PRED= 5.140 RANGE= 0.750
J12_22 0.6218 J H-7beta H-6 STAT=Y PRED= 1.070 RANGE= 2.000
J12_24 -13.7046 J H-7beta H-7alpha STAT=Y PRED= -12.430 RANGE= 1.000
J12_26 4.5778 J H-7beta H-8 STAT=Y PRED= 4.190 RANGE= 3.000
J14_15 -15.1675 J H-1beta H-1alpha STAT=Y PRED= -12.310 RANGE= 1.000
J14_17 8.2624 J H-1beta H-2 STAT=Y PRED= 8.810 RANGE= 3.000
J15_17 7.2878 J H-1alpha H-2 STAT=Y PRED= 7.110 RANGE= 3.000
J22_24 4.0483 J H-6 H-7alpha STAT=Y PRED= 4.830 RANGE= 3.000
J24_26 14.3434 J H-7alpha H-8 STAT=Y PRED= 13.120 RANGE= 2.200
J35_38 7.1931 J H-14 H-16 STAT=Y PRED= 6.640 RANGE= 0.250
```

CONTROL PARAMETERS:

```
Solvent = none (def. 99% enriched)
1.000 = Concentration (vol%, def=1.0%)
0.00100000 = Minimum line-intensity
0.00100000 = Diagonalization criterium (not in use)
7.50126041 = Left frequency (ppm)
0.00000000 = Right frequency (ppm)
10.000 = Acquisition time (s, for QMtls)
1.269 = Line-width (for modes D, P & T, 0=use defaults)
0.068609932 = Data-point resolution (Hz)
26.001 = GAUSSIAN (% 0=use default from INF)
2.174 = Dispersion contribution (% 0=use default from INF)
0.00000000 = Decoupling frequency (for DORES)
```

CONSTRAINTS (in equations X0 = 1.0)...use no empty lines

END of FILE

S2.  $^1\text{H}$  NMR spectrum of Ginkgolide A (**1**, DMSO- $d_6$ , 600 MHz).

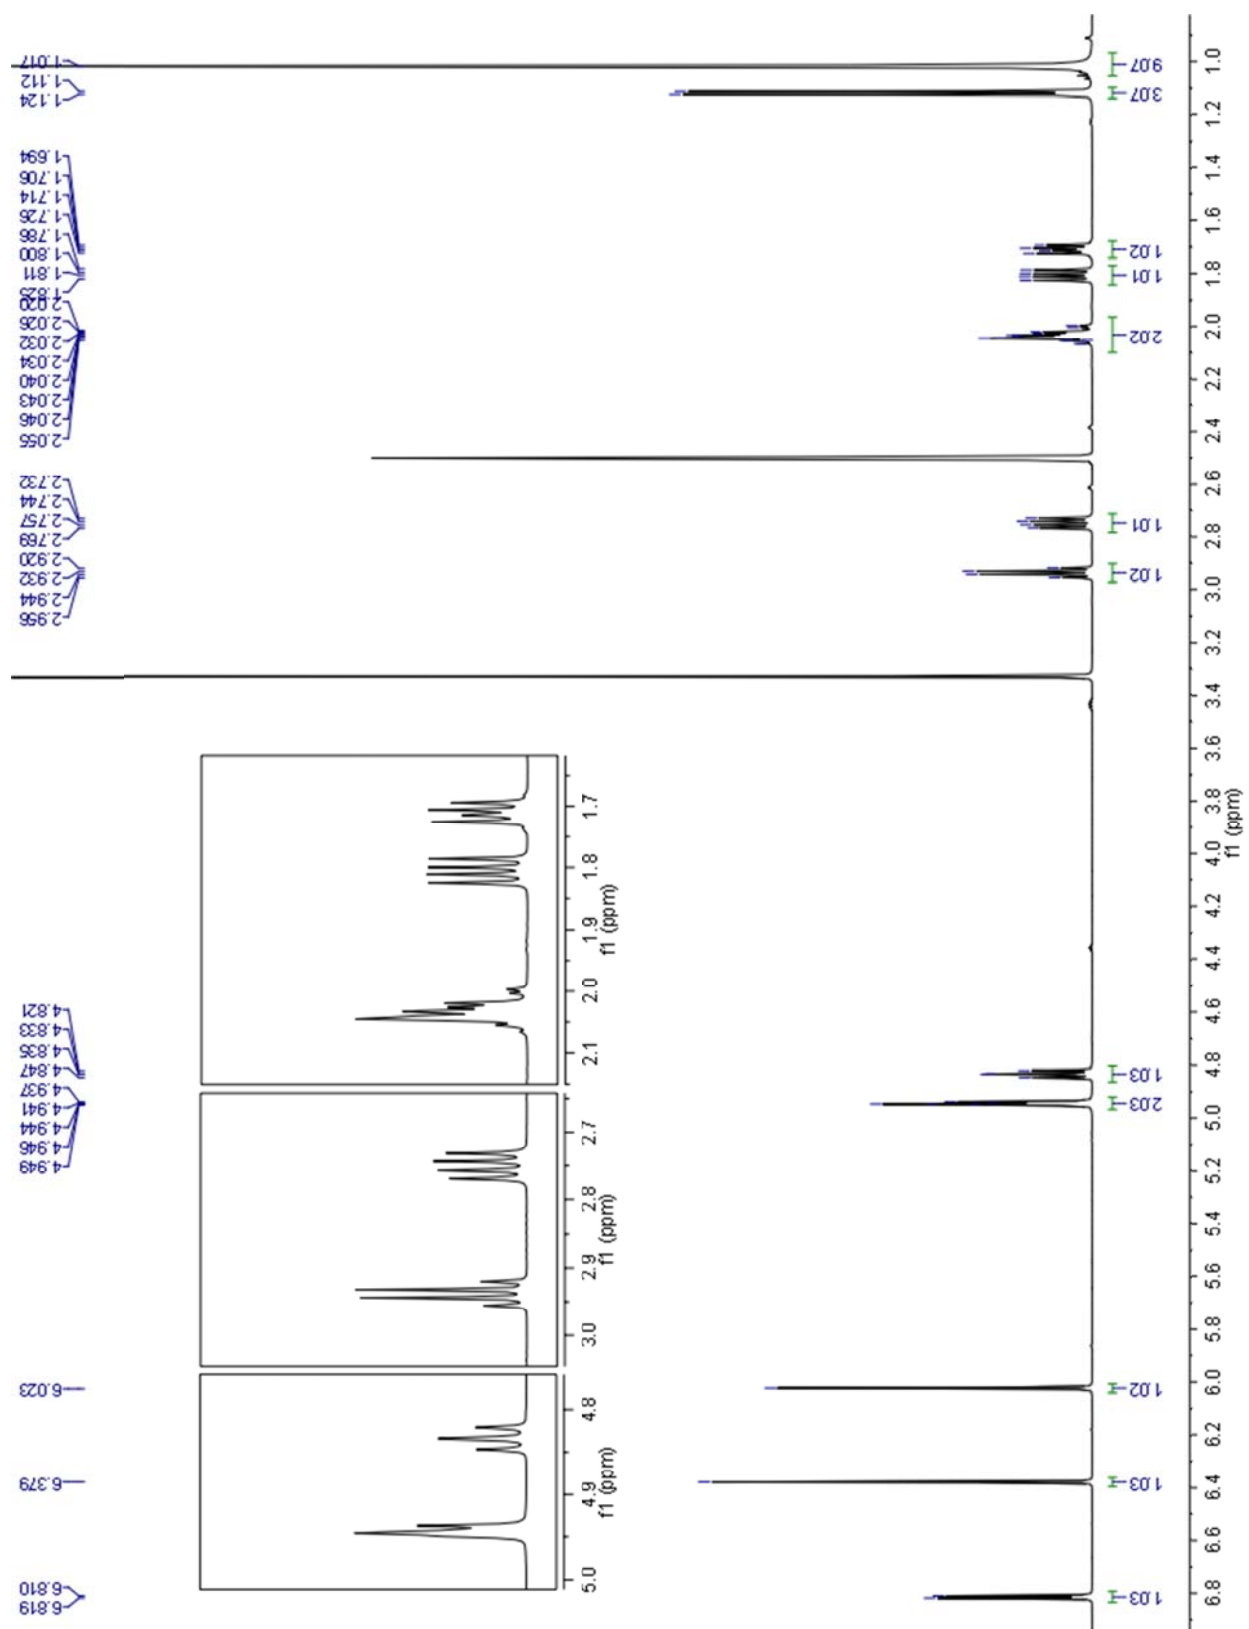

S3.  $^1\text{H}$ ,  $^1\text{H}$ -COSY experiment of Ginkgolide A (**1**, DMSO- $d_6$ , 600 MHz).

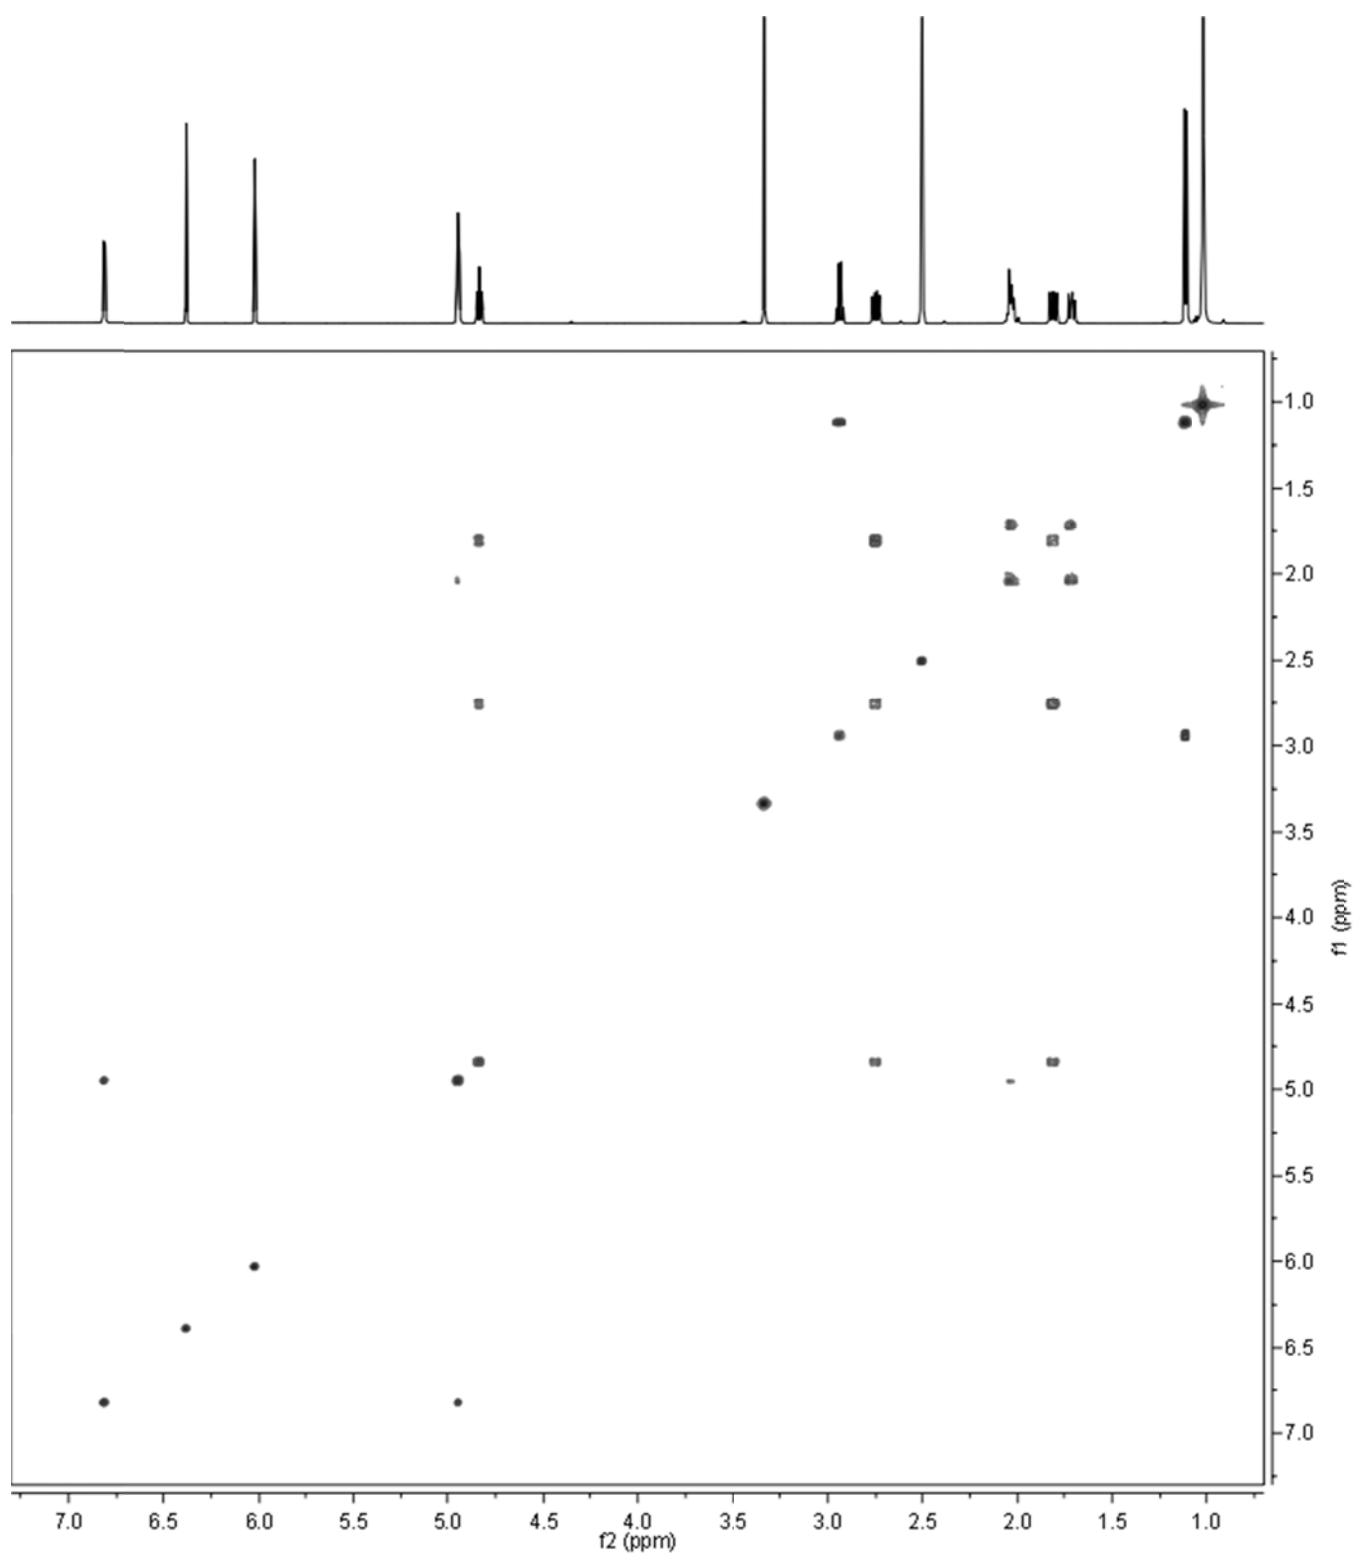

## S4. The <sup>1</sup>H Fingerprint of Ginkgolide B (2) in the PERCH .PMS file format.

\* NEW: the lines beginning by \* are comment lines !  
\* To keep all the chemical shifts fixed during iteration  
\* replace "CHEMICAL SHIFTS(HZ):" by ".SHIFTS(HZ): fixed"  
\* The couplings can be fixed in the same way

NMR-data: C:\Users\jgnapo\_2\Documents\jgnapo\perch\Ginkgolides\GB\ginkgob  
#\$ø Date 9. 3.2011; Time 17: 8:11 ginkgob.5TH

CHEMICAL SHIFTS(PPM): Similarity% = 11.032

```
PROTON 2*SPIN= 1 SPECIES=1H POPULATION(Y)= 1.00000
OH-3 / 1 6.471908 1*1*1 STAT=Y PRED= 4.913 RANGE= 1.733 WIDTH(Y)= 1.525 RESP(Y)= 1.0000
OH-10 / 1 7.462874 1*1*1 STAT=Y PRED= 4.556 RANGE= 1.695 WIDTH(Y)= 1.929 RESP(Y)= 0.9612
H-7beta / 1 2.137230 1*1*1 STAT=Y PRED= 2.036 RANGE= 0.560 WIDTH(Y)= 2.168 RESP(Y)= 0.9003 HSQC= C14
H-1 / 1 4.042104 1*1*1 STAT=Y PRED= 3.762 RANGE= 0.100 WIDTH(Y)= 1.692 RESP(Y)= 0.9364 HSQC= C8
H-2 / 1 4.642590 1*1*1 STAT=Y PRED= 4.089 RANGE= 0.187 WIDTH(Y)= 1.644 RESP(Y)= 0.9775 HSQC= C9
H-6 / 1 5.303773 1*1*1 STAT=Y PRED= 4.895 RANGE= 0.237 WIDTH(Y)= 1.799 RESP(Y)= 0.9597 HSQC= C13
H-7alpha/ 1 1.931786 1*1*1 STAT=Y PRED= 2.041 RANGE= 0.477 WIDTH(Y)= 2.242 RESP(Y)= 0.8904 HSQC= C14
H-8 / 1 1.724094 1*1*1 STAT=Y PRED= 1.670 RANGE= 0.215 WIDTH(Y)= 2.358 RESP(Y)= 0.9326 HSQC= C15
H-10 / 1 5.019748 1*1*1 STAT=Y PRED= 4.165 RANGE= 0.380 WIDTH(Y)= 1.969 RESP(Y)= 0.9334 HSQC= C17
H-12 / 1 6.074154 1*1*1 STAT=Y PRED= 5.659 RANGE= 0.330 WIDTH(Y)= 1.664 RESP(Y)= 0.9898 HSQC= C19
H-14 / 1 2.843287 1*1*1 STAT=Y PRED= 2.949 RANGE= 0.367 WIDTH(Y)= 1.666 RESP(Y)= 0.9457 HSQC= C21
H-16 / 1 1.106901 1*1*3 STAT=Y PRED= 1.102 RANGE= 0.382 WIDTH(Y)= 1.848 RESP(Y)= 0.9294 HSQC= C23
t-butyl / 1 1.028434 1*1*9 STAT=Y PRED= 0.871 RANGE= 0.202 WIDTH(Y)= 2.590 RESP(Y)= 0.8997 HSQC= C25-27
OH-1 / 1 4.918842 1*1*1 STAT=Y PRED= 6.248 RANGE= 2.488 WIDTH(Y)= 1.544 RESP(Y)= 0.9556
```

COUPLING CONSTANTS(HZ): Similarity% = 54.436

```
J6_29 5.5557 J OH-10 H-10 STAT=Y PRED= 5.110 RANGE= 0.750
J12_22 0.8476 J H-7beta H-6 STAT=Y PRED= 1.140 RANGE= 2.200
J12_24 -13.7414 J H-7beta H-7alpha STAT=Y PRED= -12.420 RANGE= 1.000
J12_26 4.6463 J H-7beta H-8 STAT=Y PRED= 4.190 RANGE= 3.000
J14_17 7.4027 J H-1 H-2 STAT=Y PRED= 7.800 RANGE= 3.000
J14_54 3.5631 J H-1 OH-1 STAT=Y PRED= 3.950 RANGE= 0.750
J22_24 4.1428 J H-6 H-7alpha STAT=Y PRED= 4.630 RANGE= 3.000
J24_26 14.3540 J H-7alpha H-8 STAT=Y PRED= 13.130 RANGE= 2.200
J35_38 7.0831 J H-14 H-16 STAT=Y PRED= 6.640 RANGE= 0.250
```

CONTROL PARAMETERS:

```
Solvent = none (def. 99% enriched)
1.000 = Concentration (vol%, def=1.0%)
0.00100000 = Minimum line-intensity
0.00100000 = Diagonalization criterium (not in use)
8.56788059 = Left frequency (ppm)
-0.17374428 = Right frequency (ppm)
10.000 = Acquisition time (s, for QMtls)
1.426 = Line-width (for modes D, P & T, 0=use defaults)
0.068609932 = Data-point resolution (Hz)
26.703 = GAUSSIAN (% , 0=use default from INF)
3.021 = Dispersion contribution (% , 0=use default from INF)
0.00000000 = Decoupling frequency (for DORES)
```

CONSTRAINTS (in equations X0 = 1.0)...use no empty lines

END of FILE

S5.  $^1\text{H}$  NMR spectrum of Ginkgolide B (**2**, DMSO- $d_6$ , 600 MHz).

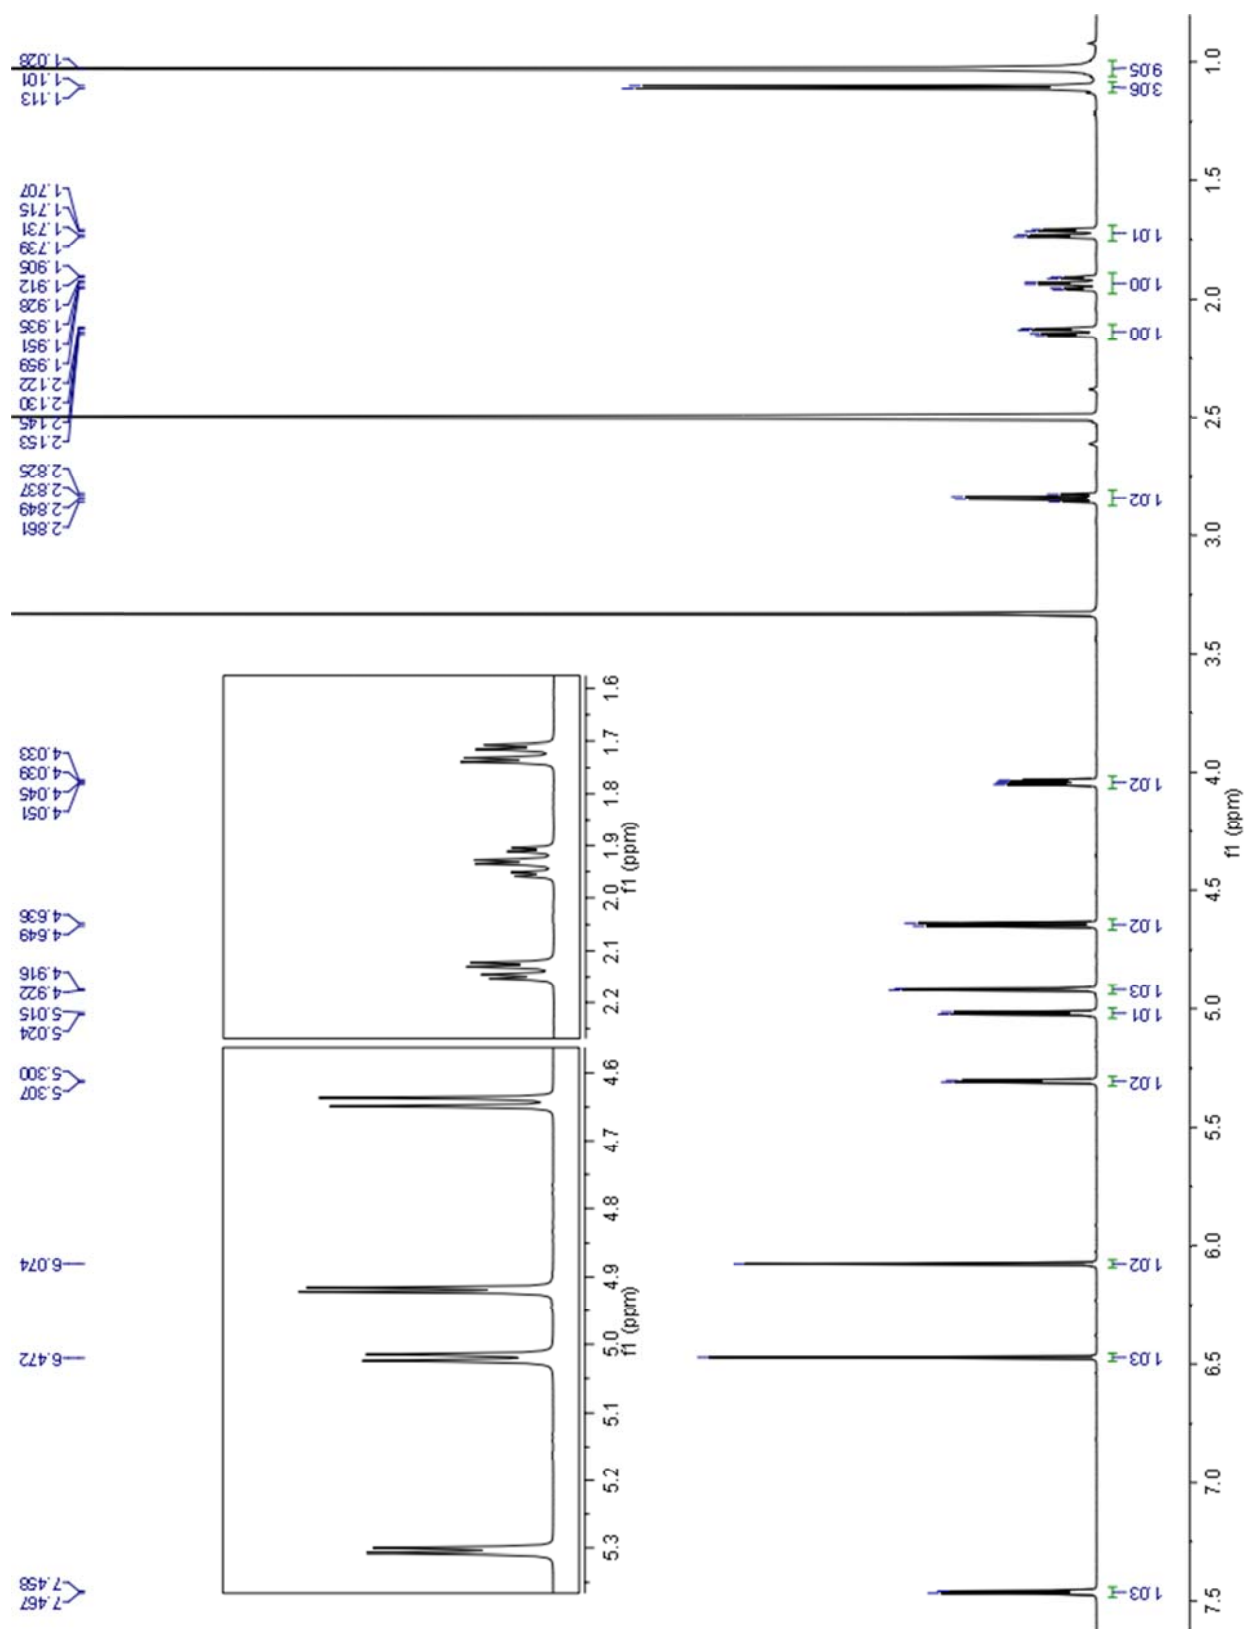



S6.  $^1\text{H}$ ,  $^1\text{H}$ -COSY experiment of Ginkgolide B (**2**, DMSO- $d_6$ , 600 MHz).

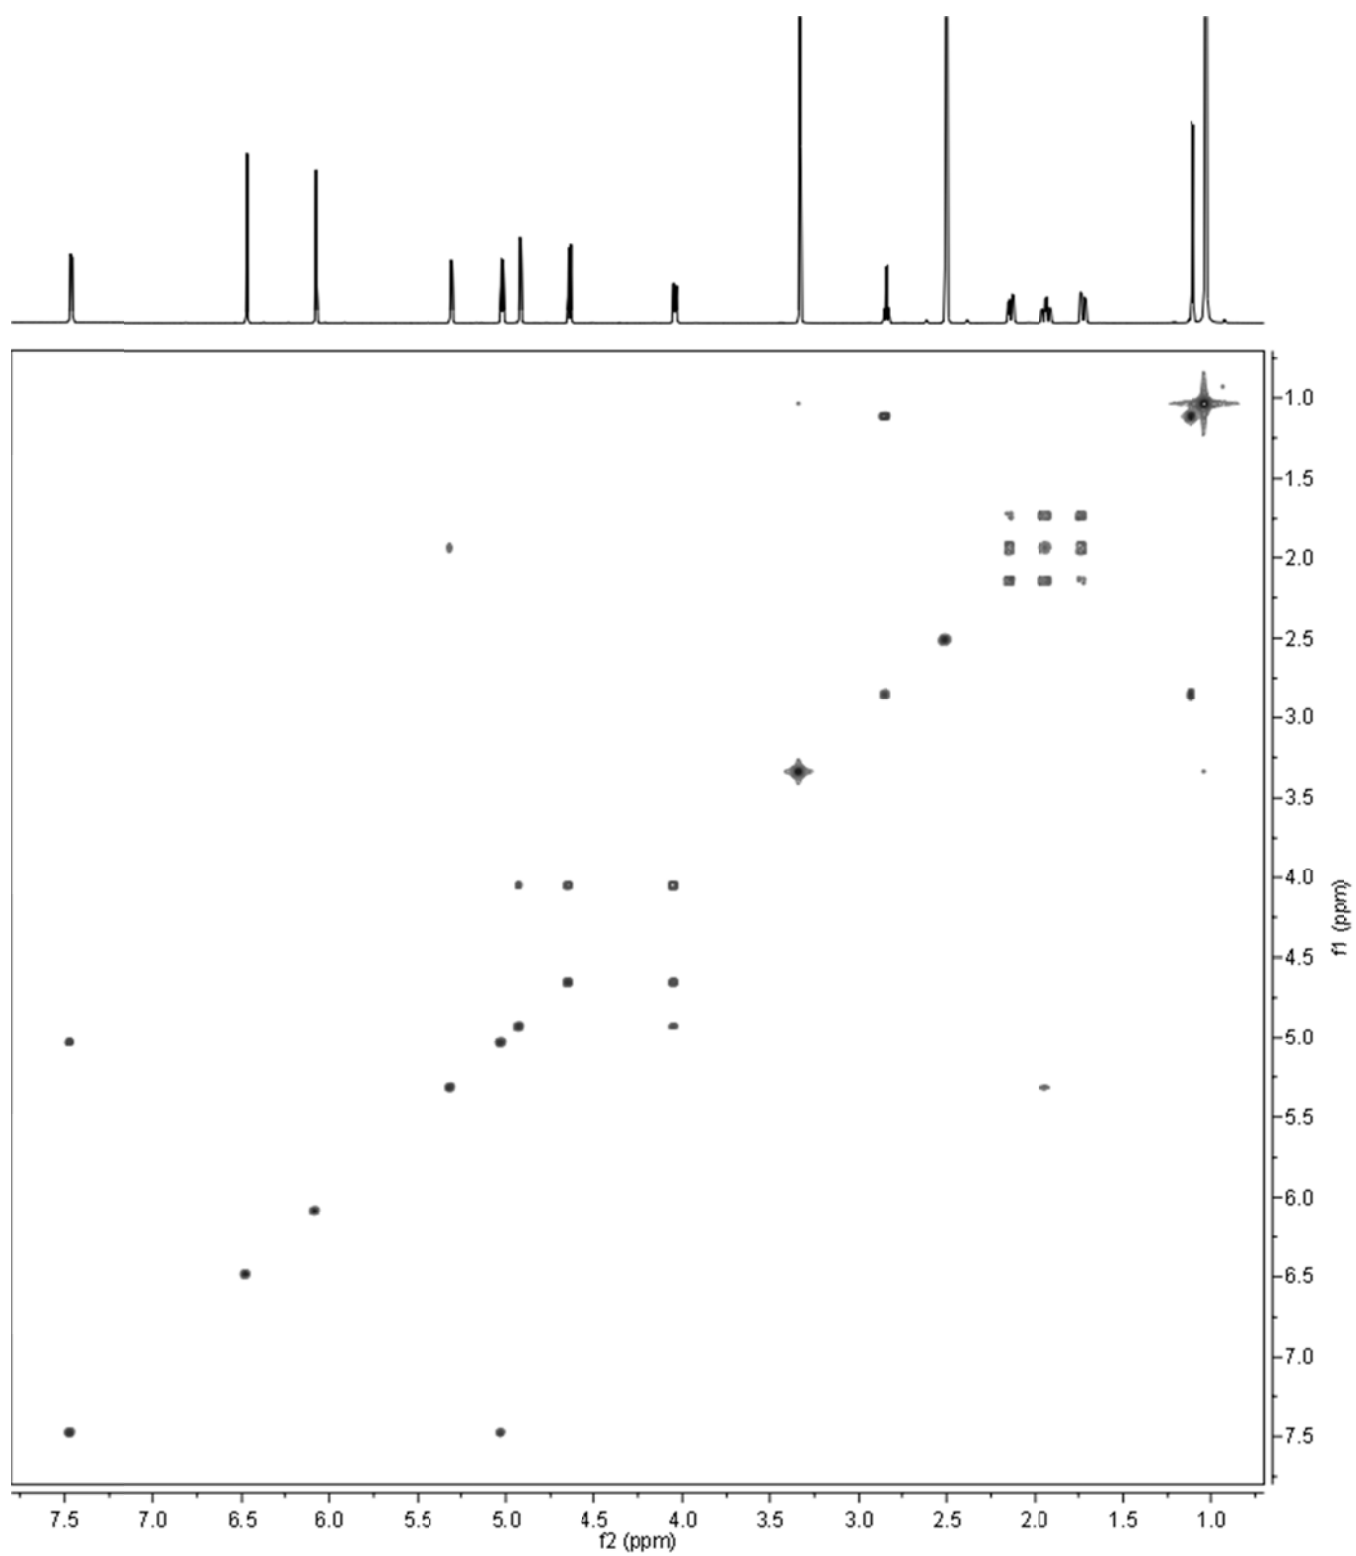

## S7. The <sup>1</sup>H Fingerprint of Ginkgolide C (3) in the PERCH .PMS file format.

\* NEW: the lines beginning by \* are comment lines !  
\* To keep all the chemical shifts fixed during iteration  
\* replace "CHEMICAL SHIFTS (HZ):" by ".SHIFTS (HZ): fixed"  
\* The couplings can be fixed in the same way

NMR-data: C:\Users\jgnapo\_2\Documents\jgnapo\perch\Ginkgolides\GC\ginkgoc  
#Date 9. 3.2011; Time 17:10:42 ginkgoc.5TH

CHEMICAL SHIFTS (PPM): Similarity% = 7.110

```
PROTON 2*SPIN= 1 SPECIES=1H POPULATION(Y)= 1.00000
OH-3 / 1 6.479066 1*1*1 STAT=Y PRED= 5.334 RANGE= 1.700 WIDTH(Y)= 1.736 RESP(Y)= 1.0000
OH-10 / 1 7.538812 1*1*1 STAT=Y PRED= 4.347 RANGE= 1.768 WIDTH(Y)= 2.242 RESP(Y)= 0.9489
OH-7 / 1 5.658435 1*1*1 STAT=Y PRED= 4.985 RANGE= 1.620 WIDTH(Y)= 1.944 RESP(Y)= 0.9704
H-1beta/ 1 3.986275 1*1*1 STAT=Y PRED= 4.316 RANGE= 0.100 WIDTH(Y)= 1.907 RESP(Y)= 0.9449 HSQC= C8
H-2 / 1 4.626842 1*1*1 STAT=Y PRED= 4.089 RANGE= 0.170 WIDTH(Y)= 1.789 RESP(Y)= 0.9761 HSQC= C9
H-6 / 1 4.966384 1*1*1 STAT=Y PRED= 4.852 RANGE= 0.122 WIDTH(Y)= 1.940 RESP(Y)= 0.9965 HSQC= C13
H-7 / 1 4.053494 1*1*1 STAT=Y PRED= 4.559 RANGE= 0.317 WIDTH(Y)= 1.975 RESP(Y)= 0.9273 HSQC= C14
H-8 / 1 1.551161 1*1*1 STAT=Y PRED= 1.808 RANGE= 0.222 WIDTH(Y)= 2.077 RESP(Y)= 0.9481 HSQC= C15
H-10 / 1 4.998365 1*1*1 STAT=Y PRED= 4.165 RANGE= 0.367 WIDTH(Y)= 2.302 RESP(Y)= 0.9280 HSQC= C17
H-12 / 1 6.099451 1*1*1 STAT=Y PRED= 5.659 RANGE= 0.325 WIDTH(Y)= 1.837 RESP(Y)= 0.9848 HSQC= C19
H-14 / 1 2.813690 1*1*1 STAT=Y PRED= 2.949 RANGE= 0.342 WIDTH(Y)= 1.804 RESP(Y)= 0.9418 HSQC= C21
H-16 / 1 1.107483 1*1*3 STAT=Y PRED= 1.103 RANGE= 0.377 WIDTH(Y)= 1.979 RESP(Y)= 0.8915 HSQC= C23
t-butyl/ 1 1.091336 1*1*9 STAT=Y PRED= 0.887 RANGE= 0.225 WIDTH(Y)= 2.733 RESP(Y)= 0.8975 HSQC= C25-27
OH-1 / 1 4.971784 1*1*1 STAT=Y PRED= 5.998 RANGE= 1.965 WIDTH(Y)= 1.840 RESP(Y)= 0.8956
```

COUPLING CONSTANTS (HZ): Similarity% = 28.377

```
J6_30 5.6531 J OH-10 H-10 STAT=Y PRED= 4.950 RANGE= 0.750
J13_25 6.2720 J OH-7 H-7 STAT=Y PRED= 4.300 RANGE= 0.500
J15_18 7.2205 J H-1beta H-2 STAT=Y PRED= 7.910 RANGE= 3.000
J15_55 3.6847 J H-1beta OH-1 STAT=Y PRED= 4.300 RANGE= 0.500
J23_25 4.1999 J H-6 H-7 STAT=Y PRED= 4.670 RANGE= 3.000
J25_27 12.3964 J H-7 H-8 STAT=Y PRED= 11.070 RANGE= 2.200
J36_39 7.0914 J H-14 H-16 STAT=Y PRED= 6.640 RANGE= 0.250
```

CONTROL PARAMETERS:

```
Solvent = none (def. 99% enriched)
1.000 = Concentration (vol%, def=1.0%)
0.00100000 = Minimum line-intensity
0.00100000 = Diagonalization criterium (not in use)
8.89596571 = Left frequency (ppm)
0.00000000 = Right frequency (ppm)
10.000 = Acquisition time (s, for QMtls)
1.640 = Line-width (for modes D, P & T, 0=use defaults)
0.068609932 = Data-point resolution (Hz)
33.440 = GAUSSIAN (% , 0=use default from INF)
-0.834 = Dispersion contribution (% , 0=use default from INF)
0.00000000 = Decoupling frequency (for DORES)
```

CONSTRAINTS (in equations X0 = 1.0)...use no empty lines

END of FILE

**S8.**  $^1\text{H}$  NMR spectrum of Ginkgolide C (**3**,  $\text{DMSO-}d_6$ , 600 MHz).

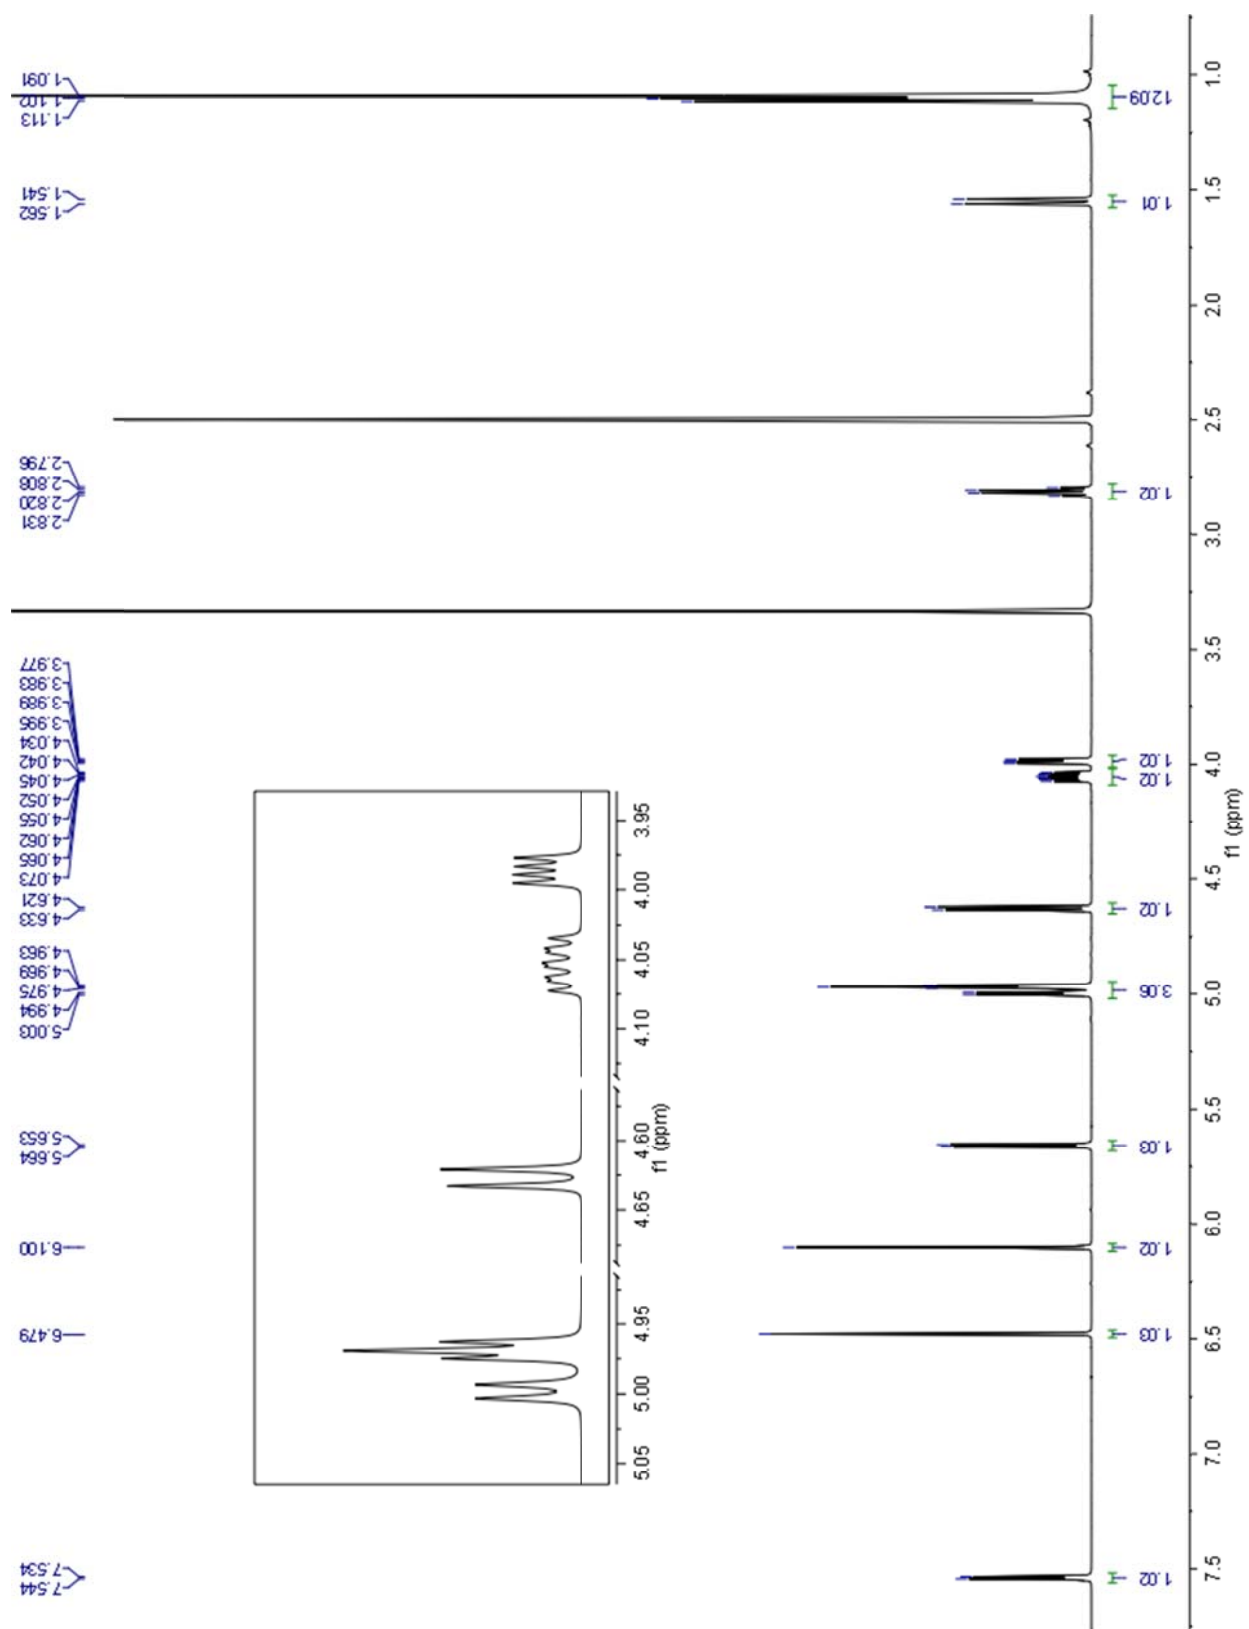

**S9.**  $^1\text{H}$ ,  $^1\text{H}$ -COSY experiment of Ginkgolide C (**3**,  $\text{DMSO-}d_6$ , 600 MHz).

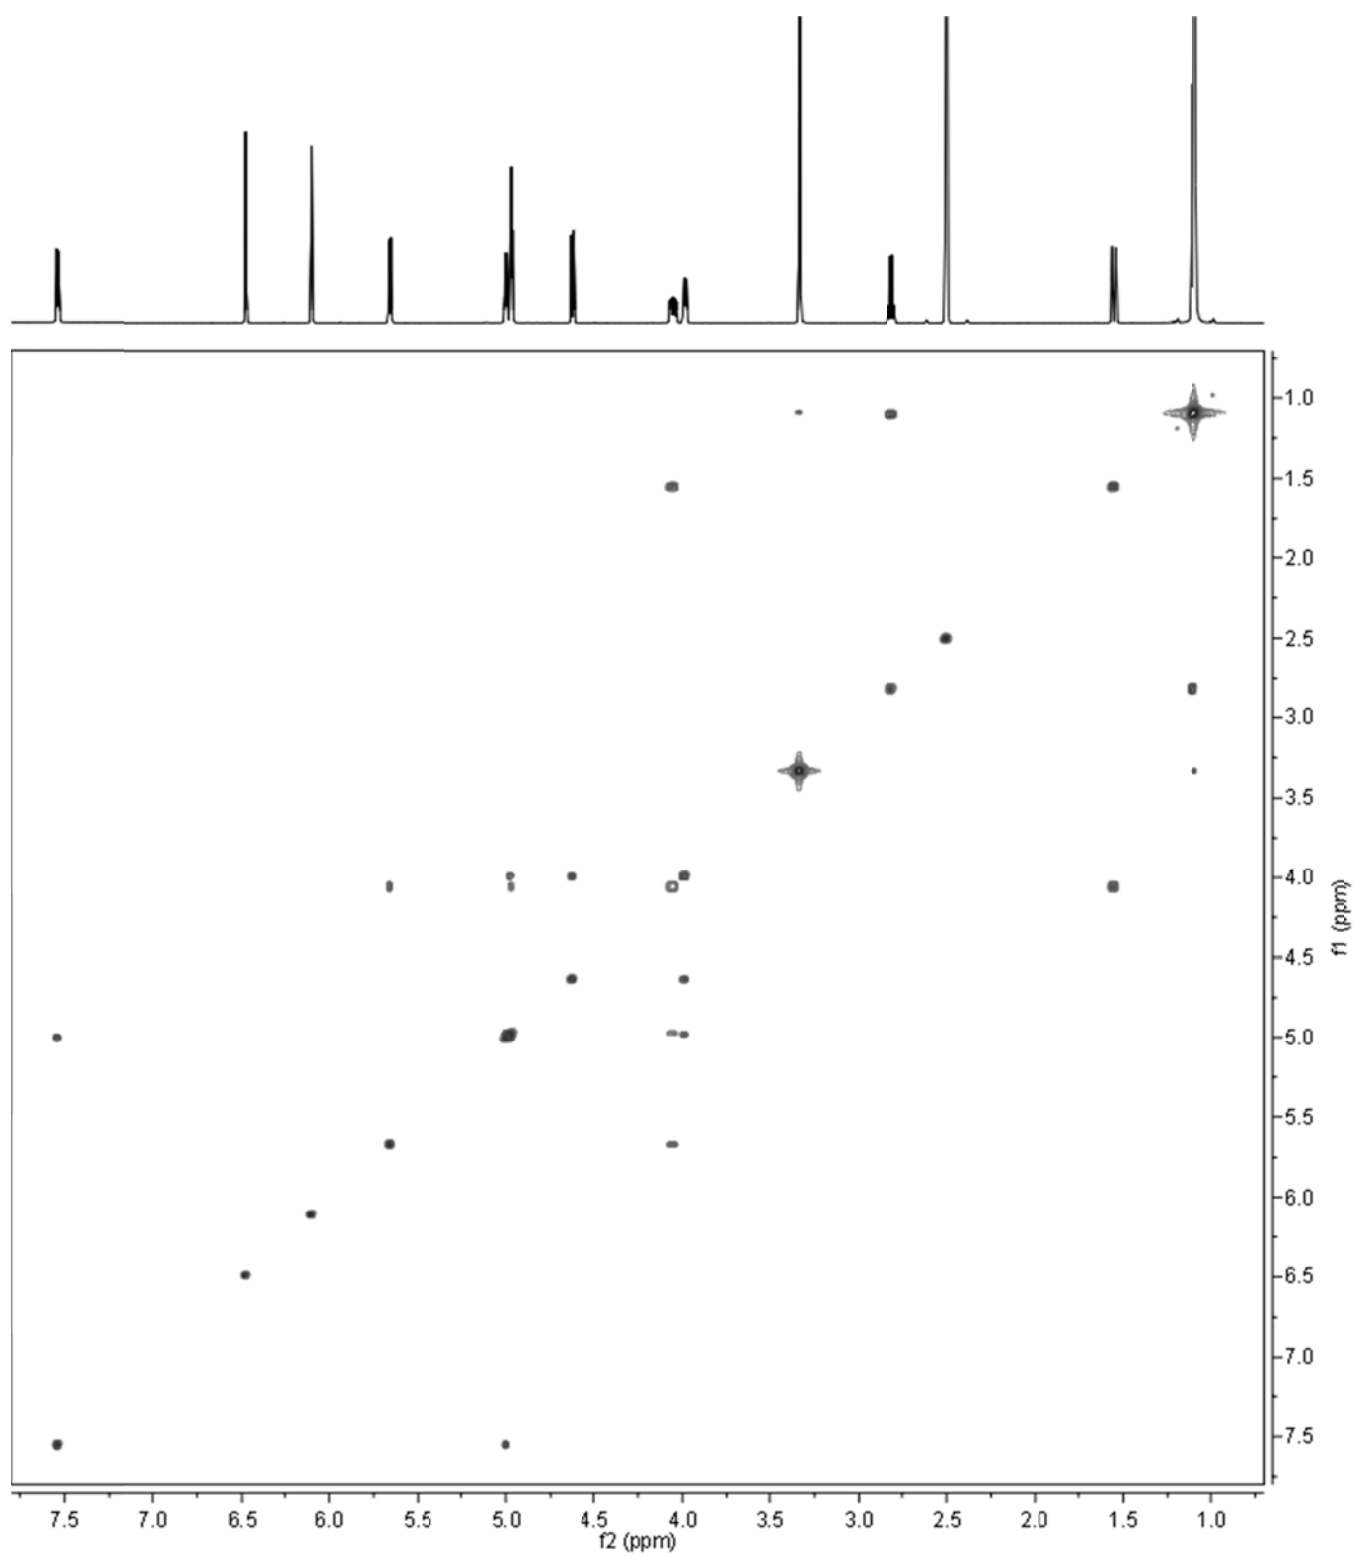

## S10. The <sup>1</sup>H Fingerprint of Ginkgolide J (4) in the PERCH .PMS file format.

\* NEW: the lines beginning by \* are comment lines !  
\* To keep all the chemical shifts fixed during iteration  
\* replace "CHEMICAL SHIFTS (HZ):" by ".SHIFTS (HZ): fixed"  
\* The couplings can be fixed in the same way

NMR-data: C:\Users\jgnapo\_2\Documents\jgnapo\perch\Ginkgolides\GJ\ginkgoj  
#S& Date 9. 3.2011; Time 17:14:19 ginkgoj.5TH

CHEMICAL SHIFTS (PPM): Similarity% = 13.626

```
PROTON 2*SPIN= 1 SPECIES=1H POPULATION(Y)= 1.00000
OH-3 / 1 6.393136 1*1*1 STAT=Y PRED= 4.925 RANGE= 1.775 WIDTH(Y)= 1.498 RESP(Y)= 1.0000
OH-10 / 1 6.908209 1*1*1 STAT=Y PRED= 4.324 RANGE= 1.710 WIDTH(Y)= 1.844 RESP(Y)= 0.9617
OH-7 / 1 5.545649 1*1*1 STAT=Y PRED= 4.759 RANGE= 1.580 WIDTH(Y)= 1.670 RESP(Y)= 0.9709
H-1beta / 1 1.752901 1*1*1 STAT=Y PRED= 1.338 RANGE= 0.287 WIDTH(Y)= 2.106 RESP(Y)= 0.9100 HSQC= C8
H-1alpha / 1 2.717097 1*1*1 STAT=Y PRED= 2.169 RANGE= 0.377 WIDTH(Y)= 2.200 RESP(Y)= 0.8989 HSQC= C8
H-2 / 1 4.832003 1*1*1 STAT=Y PRED= 4.895 RANGE= 0.232 WIDTH(Y)= 1.942 RESP(Y)= 0.9577 HSQC= C9
H-6 / 1 4.645476 1*1*1 STAT=Y PRED= 4.895 RANGE= 0.110 WIDTH(Y)= 1.872 RESP(Y)= 0.9688 HSQC= C13
H-7 / 1 4.171447 1*1*1 STAT=Y PRED= 4.559 RANGE= 0.325 WIDTH(Y)= 1.862 RESP(Y)= 0.9203 HSQC= C14
H-8 / 1 1.537556 1*1*1 STAT=Y PRED= 1.768 RANGE= 0.212 WIDTH(Y)= 1.979 RESP(Y)= 0.9531 HSQC= C15
H-10 / 1 4.928198 1*1*1 STAT=Y PRED= 4.165 RANGE= 0.390 WIDTH(Y)= 2.064 RESP(Y)= 0.9291 HSQC= C17
H-12 / 1 6.046780 1*1*1 STAT=Y PRED= 5.659 RANGE= 0.332 WIDTH(Y)= 1.684 RESP(Y)= 0.9761 HSQC= C19
H-14 / 1 2.906534 1*1*1 STAT=Y PRED= 2.949 RANGE= 0.362 WIDTH(Y)= 1.711 RESP(Y)= 0.9406 HSQC= C21
H-16 / 1 1.117886 1*1*3 STAT=Y PRED= 1.135 RANGE= 0.260 WIDTH(Y)= 1.906 RESP(Y)= 0.9293 HSQC= C23
t-butyl / 1 1.081520 1*1*9 STAT=Y PRED= 0.894 RANGE= 0.230 WIDTH(Y)= 2.587 RESP(Y)= 0.9000 HSQC= C25-27
```

COUPLING CONSTANTS (HZ): Similarity% = 17.523

```
J6_30 5.3487 J OH-10 H-10 STAT=Y PRED= 5.040 RANGE= 0.750
J13_25 6.8614 J OH-7 H-7 STAT=Y PRED= 4.300 RANGE= 0.500
J15_16 -15.1380 J H-1beta H-1alpha STAT=Y PRED= -12.310 RANGE= 1.000
J15_18 8.1701 J H-1beta H-2 STAT=Y PRED= 9.280 RANGE= 3.000
J16_18 7.2493 J H-1alpha H-2 STAT=Y PRED= 7.040 RANGE= 3.000
J23_25 4.1855 J H-6 H-7 STAT=Y PRED= 4.830 RANGE= 3.000
J25_27 12.2977 J H-7 H-8 STAT=Y PRED= 11.060 RANGE= 2.200
J36_39 7.2044 J H-14 H-16 STAT=Y PRED= 6.640 RANGE= 0.250
```

CONTROL PARAMETERS:

```
Solvent = none (def. 99% enriched)
1.000 = Concentration (vol%, def=1.0%)
0.00100000 = Minimum line-intensity
0.00100000 = Diagonalization criterium (not in use)
7.83034303 = Left frequency (ppm)
-0.20624264 = Right frequency (ppm)
10.000 = Acquisition time (s, for QMtls)
1.433 = Line-width (for modes D, P & T, 0=use defaults)
0.068609932 = Data-point resolution (Hz)
25.038 = GAUSSIAN (% , 0=use default from INF)
-2.507 = Dispersion contribution (% , 0=use default from INF)
0.00000000 = Decoupling frequency (for DORES)
```

CONSTRAINTS (in equations X0 = 1.0)...use no empty lines

EQUAL H-2 = H-6

END of FILE



**S12.**  $^1\text{H}$ ,  $^1\text{H}$ -COSY experiment of Ginkgolide J (**4**, DMSO- $d_6$ , 600 MHz).

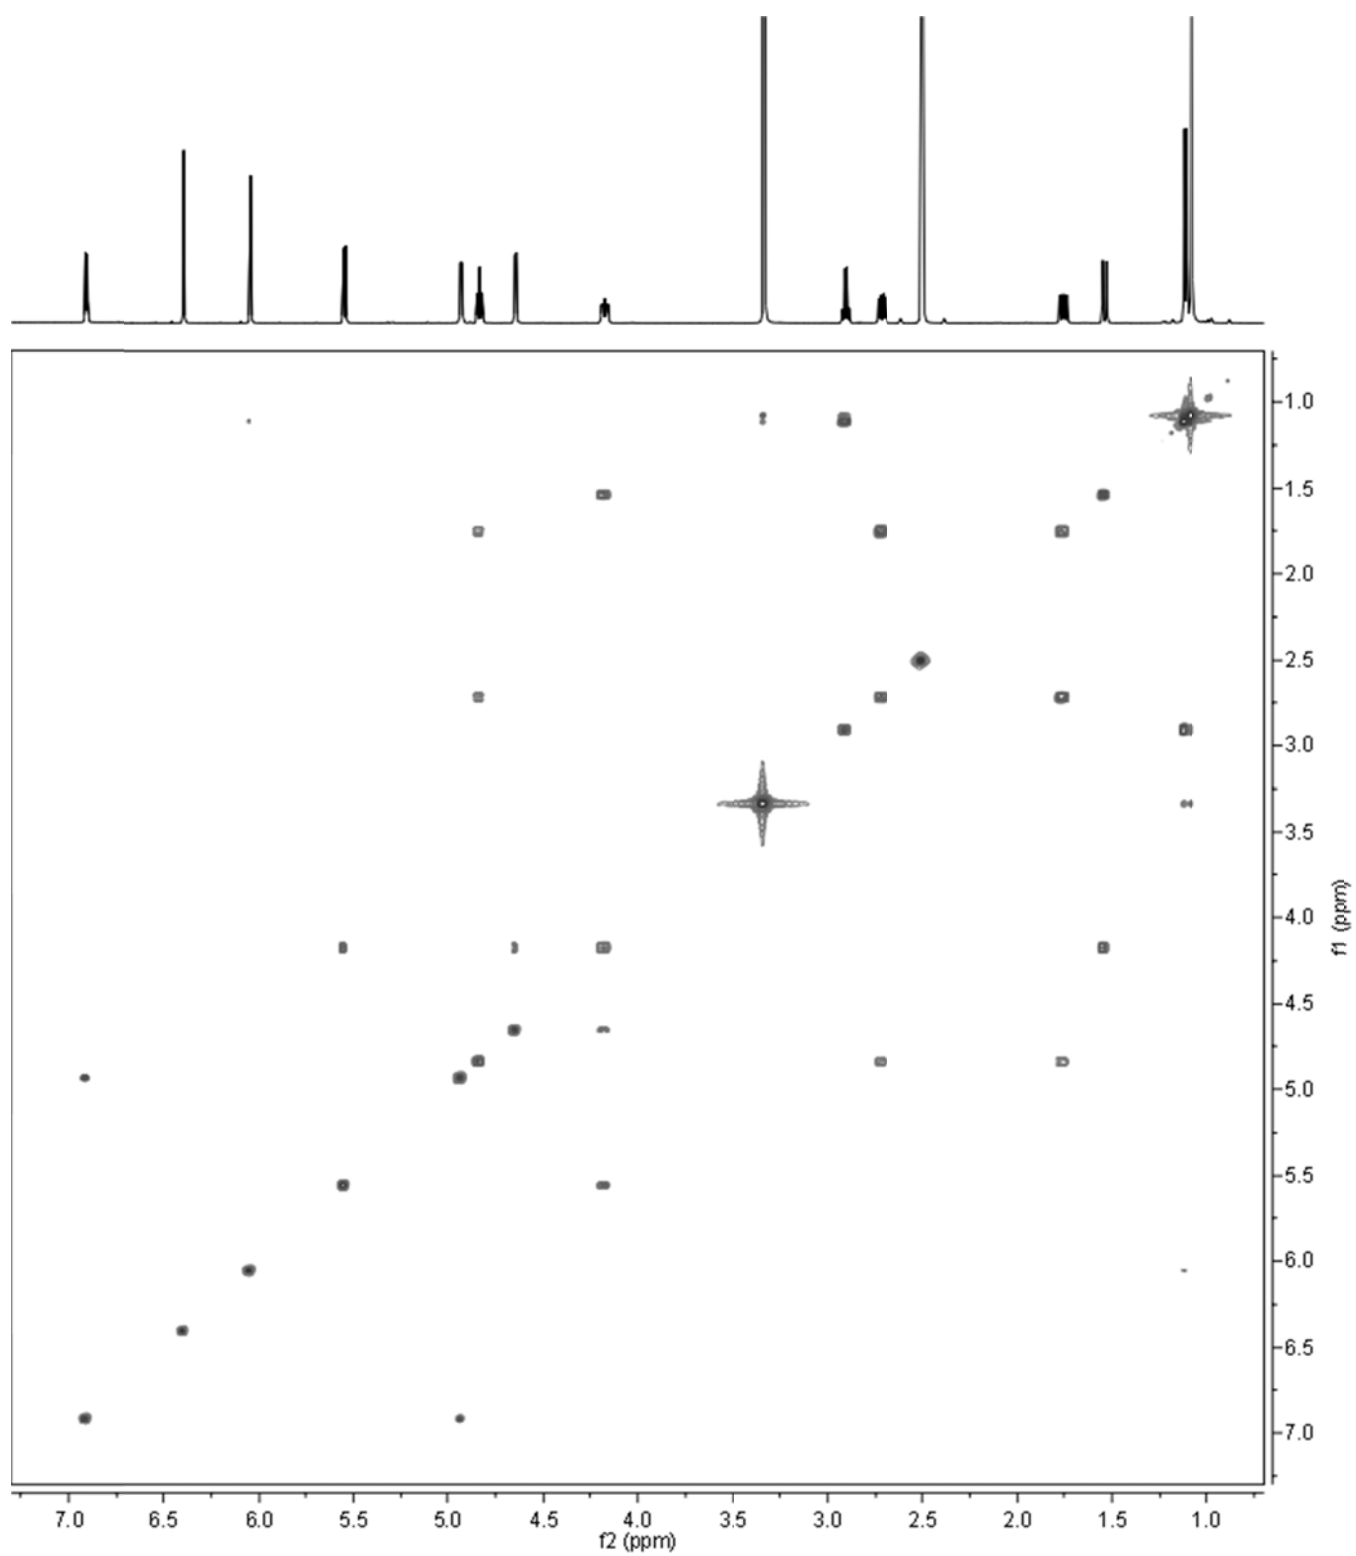

### S13. The <sup>1</sup>H Fingerprint of Bilobalide (5) in the PERCH .PMS file format.

\* NEW: the lines beginning by \* are comment lines !  
\* To keep all the chemical shifts fixed during iteration  
\* replace "CHEMICAL SHIFTS(HZ):" by ".SHIFTS(HZ): fixed"  
\* The couplings can be fixed in the same way

NMR-data: C:\Users\jgnapo\_2\Documents\jgnapo\perch\Ginkgolides\BB\bb  
#\$ø Date 9. 3.2011; Time 17: 1:31 bb.5TH

CHEMICAL SHIFTS(PPM): Similarity% = 12.410

```
PROTON 2*SPIN= 1 SPECIES=1H POPULATION(Y)= 1.00000
OH-10 / 1 7.253250 1*1*1 STAT=Y PRED= 4.828 RANGE= 1.750 WIDTH(Y)= 1.600 RESP(Y)= 0.9729
H-7beta / 1 2.077084 1*1*1 STAT=Y PRED= 1.896 RANGE= 0.357 WIDTH(Y)= 1.891 RESP(Y)= 0.9170 HSQC= C14
H-6 / 1 4.916794 1*1*1 STAT=Y PRED= 4.888 RANGE= 0.282 WIDTH(Y)= 1.768 RESP(Y)= 0.9697 HSQC= C13
H-7alpha/ 1 2.561866 1*1*1 STAT=Y PRED= 2.518 RANGE= 0.282 WIDTH(Y)= 1.976 RESP(Y)= 0.8993 HSQC= C14
H-10 / 1 5.149952 1*1*1 STAT=Y PRED= 4.165 RANGE= 0.370 WIDTH(Y)= 1.774 RESP(Y)= 0.9421 HSQC= C17
H-12 / 1 6.274102 1*1*1 STAT=Y PRED= 5.659 RANGE= 0.102 WIDTH(Y)= 1.500 RESP(Y)= 1.0000 HSQC= C19
t-Butyl / 1 1.034063 1*1*9 STAT=Y PRED= 0.914 RANGE= 0.237 WIDTH(Y)= 2.678 RESP(Y)= 0.9023 HSQC= C25-27
OH-8 / 1 5.403089 1*1*1 STAT=Y PRED= 3.979 RANGE= 1.923 WIDTH(Y)= 1.508 RESP(Y)= 0.9843
H-1beta / 1 2.774028 1*1*1 STAT=Y PRED= 2.359 RANGE= 0.370 WIDTH(Y)= 1.686 RESP(Y)= 0.9603 HSQC= #27
H-1alpha/ 1 2.897044 1*1*1 STAT=Y PRED= 2.405 RANGE= 0.462 WIDTH(Y)= 1.740 RESP(Y)= 0.9580 HSQC= #27
```

COUPLING CONSTANTS(HZ): Similarity% = 64.488

```
J4_18 5.1195 J OH-10 H-10 STAT=Y PRED= 4.890 RANGE= 0.750
J7_11 6.8503 J H-7beta H-6 STAT=Y PRED= 9.550 RANGE= 3.000
J7_13 -13.3259 J H-7beta H-7alpha STAT=Y PRED= -12.140 RANGE= 1.000
J11_13 7.0969 J H-6 H-7alpha STAT=Y PRED= 6.600 RANGE= 3.000
J40_41 -18.1406 J H-1beta H-1alpha STAT=Y PRED= -15.860 RANGE= 2.000
```

CONTROL PARAMETERS:

```
Solvent = none (def. 99% enriched)
1.000 = Concentration (vol%, def=1.0%)
0.00100000 = Minimum line-intensity
0.00100000 = Diagonalization criterium (not in use)
8.04426687 = Left frequency (ppm)
0.00000000 = Right frequency (ppm)
10.000 = Acquisition time (s, for QMTPS)
1.505 = Line-width (for modes D, P & T, 0=use defaults)
0.068609932 = Data-point resolution (Hz)
25.060 = GAUSSIAN (% , 0=use default from INF)
2.716 = Dispersion contribution (% , 0=use default from INF)
0.00000000 = Decoupling frequency (for DORES)
```

CONSTRAINTS (in equations X0 = 1.0)...use no empty lines

END of FILE



**S14.**  $^1\text{H}$  NMR spectrum of Bilobalide (**5**, DMSO- $d_6$ , 600 MHz).

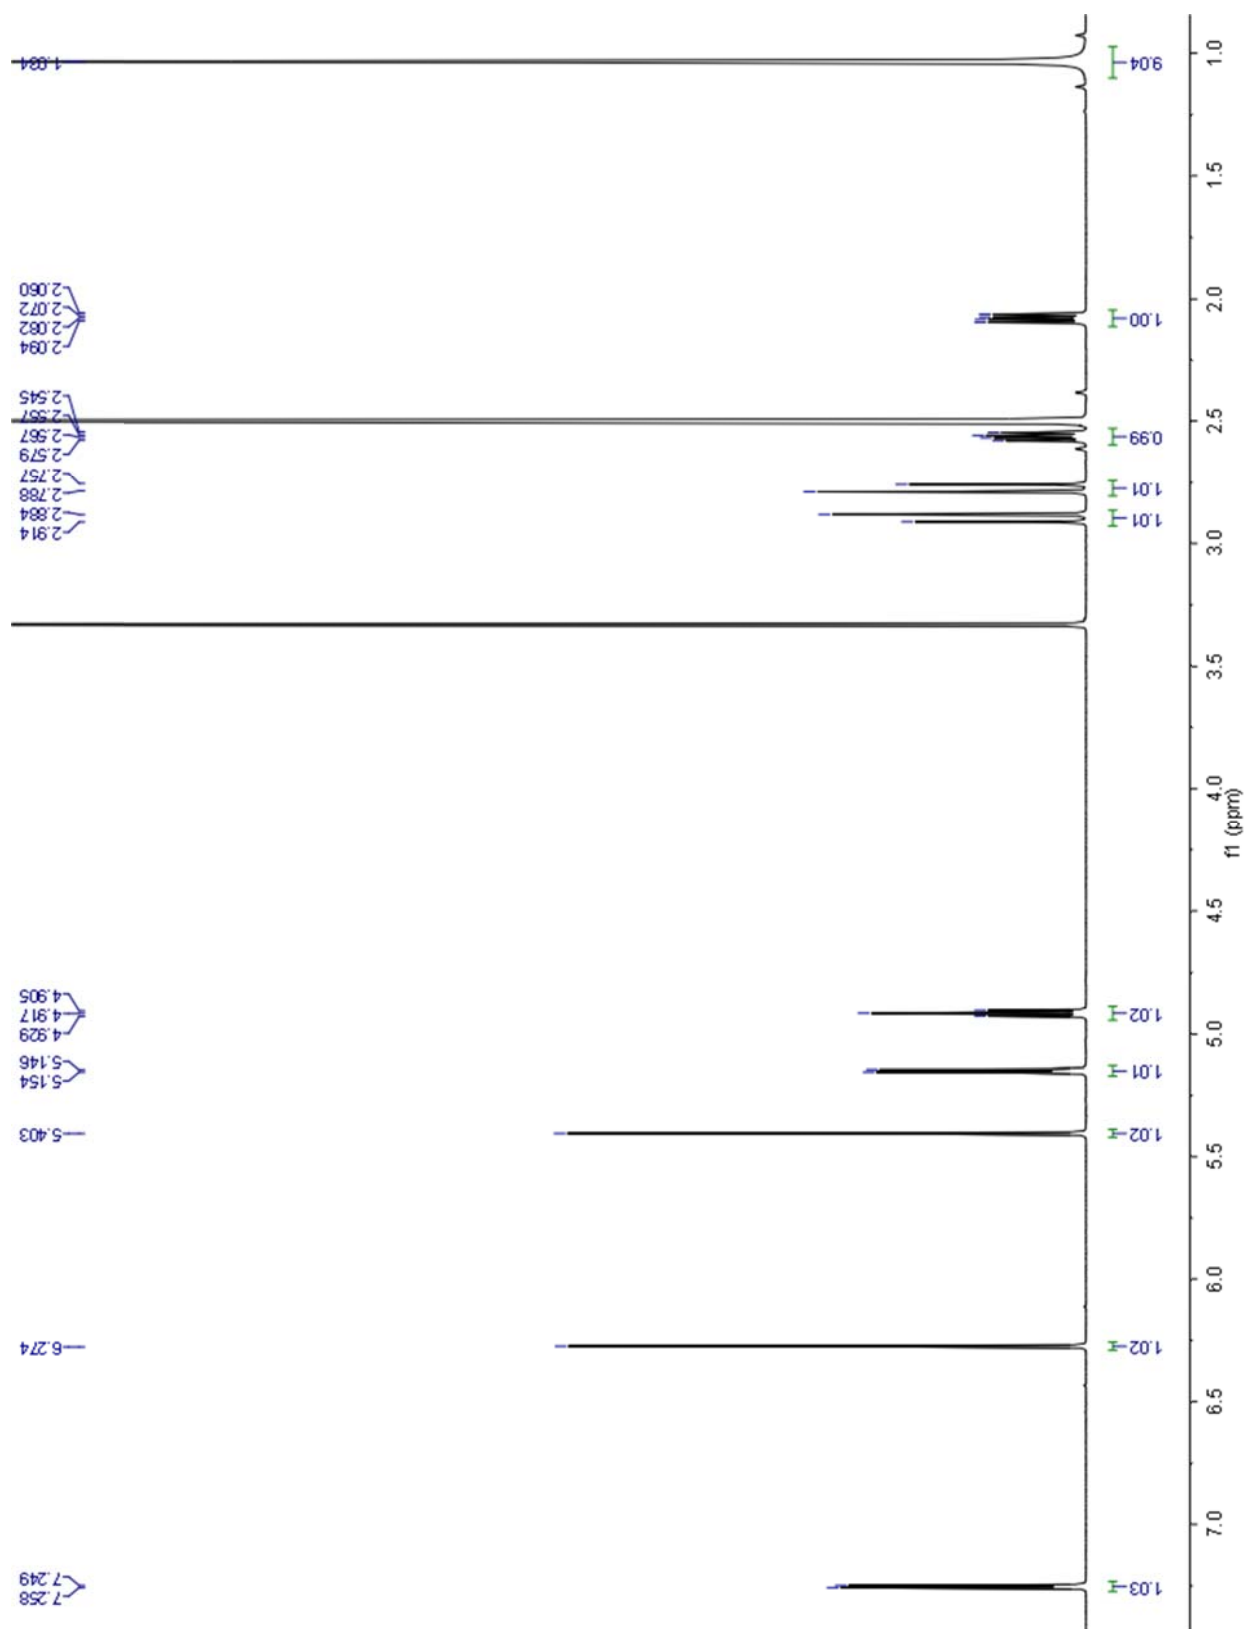

**S15.**  $^1\text{H}$ ,  $^1\text{H}$ -COSY experiment of Bilobalide (**5**,  $\text{DMSO-}d_6$ , 600 MHz).

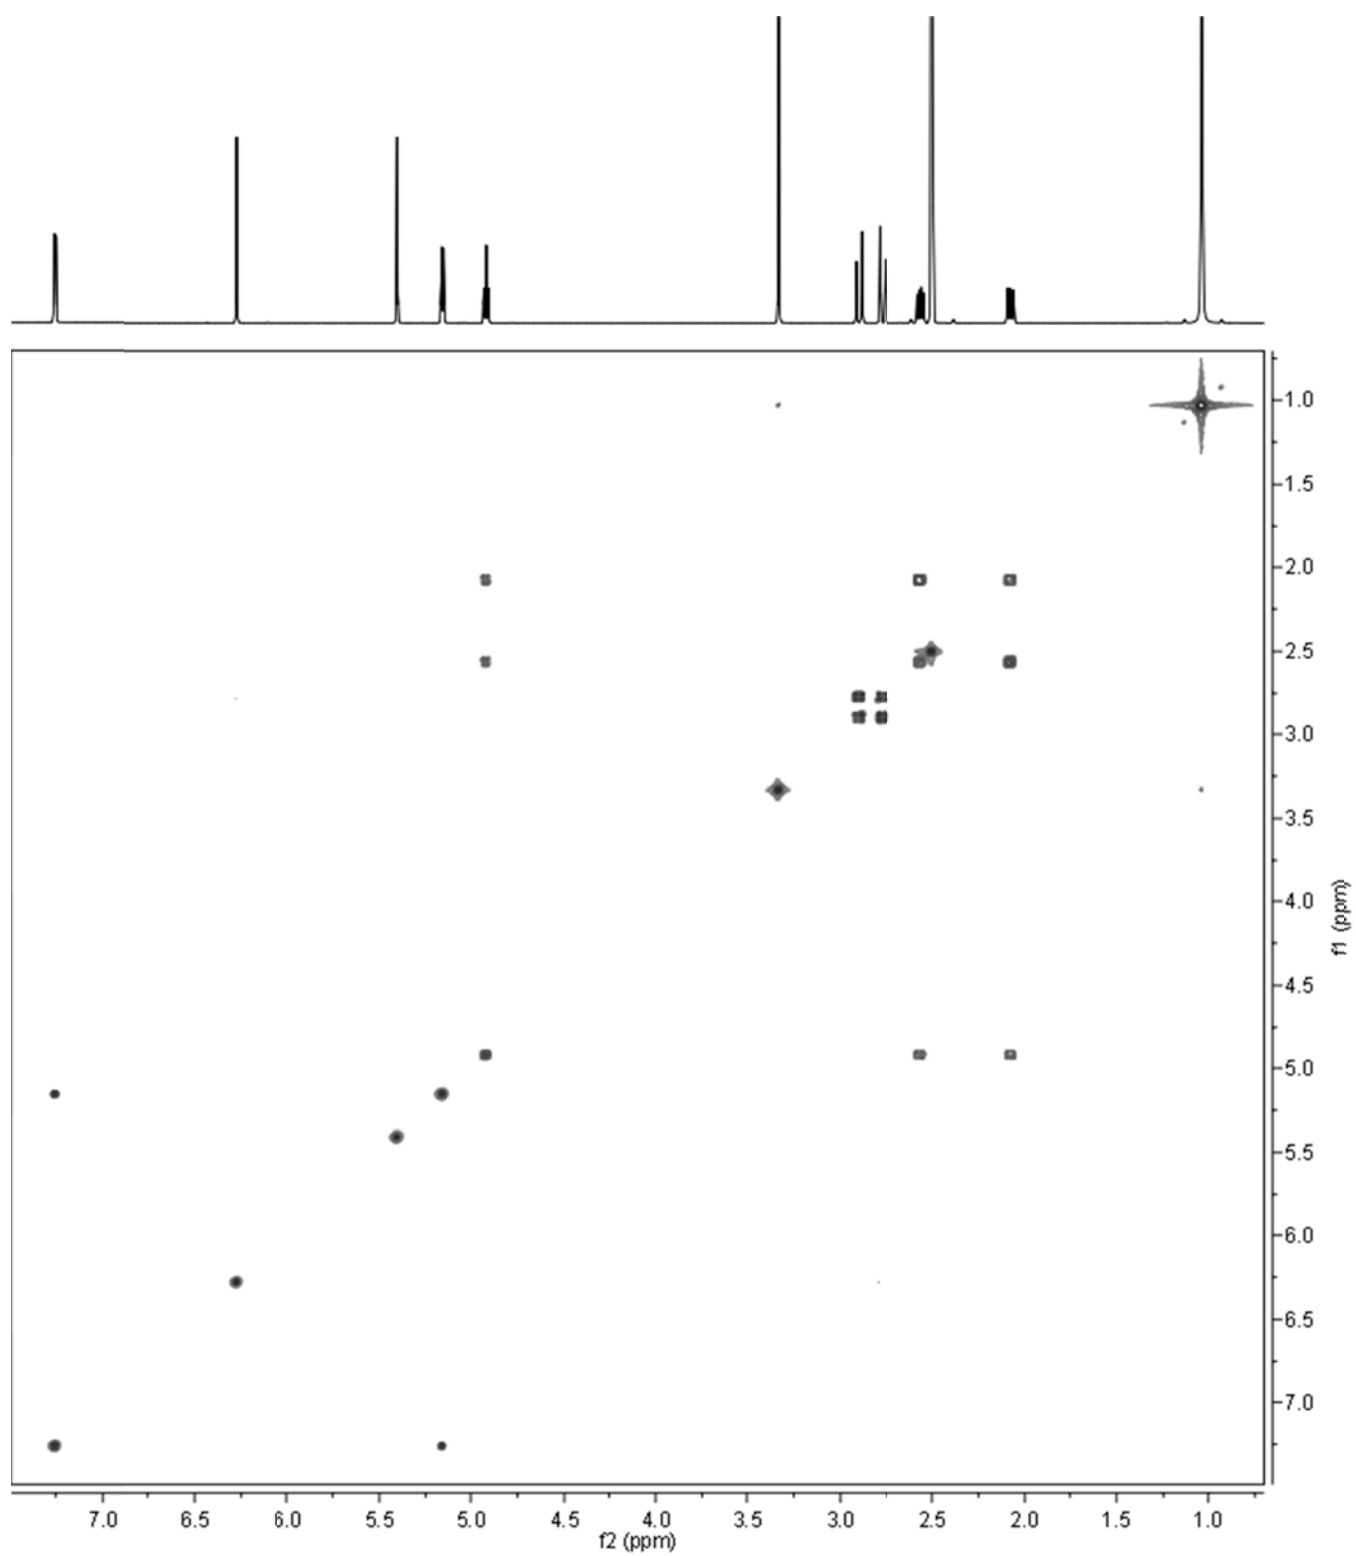

## S16. The <sup>1</sup>H Fingerprint of Quercetin (6) in the PERCH .PMS file format.

```
* NEW: the lines beginning by * are comment lines !
* To keep all the chemical shifts fixed during iteration
* replace "CHEMICAL SHIFTS(HZ):" by ".SHIFTS(HZ): fixed"
* The couplings can be fixed in the same way

NMR-data: C:\Users\jgnapo_2\Documents\users\jgnapo\perch\Ginkgo\Flavonoids\
#$ø Date 20.10.2011; Time 16: 2:48      perch.3rd

CHEMICAL SHIFTS (PPM) :
PROTON      2*SPIN= 1 SPECIES=1H      POPULATION(Y)= 1.00000
H6 / 1      6.183050 1*1*1 STAT=Y PRED= 6.298 RANGE= 0.242 WIDTH(Y)= 1.416 RESP(Y)= 1.0000 HSQC= C2
H8 / 1      6.403402 1*1*1 STAT=Y PRED= 6.461 RANGE= 0.172 WIDTH(Y)= 1.407 RESP(Y)= 0.9861 HSQC= C4
OH7 / 1     10.783504 1*1*1 STAT=Y PRED= 10.896 RANGE= 1.000 WIDTH(Y)= 1.739 RESP(Y)= 0.9816
OH5 / 1     12.494440 1*1*1 STAT=Y PRED= 13.379 RANGE= 0.850 WIDTH(Y)= 1.942 RESP(Y)= 0.9532
H6' / 1     7.536549 1*1*1 STAT=Y PRED= 7.627 RANGE= 0.265 WIDTH(Y)= 1.496 RESP(Y)= 0.9718 HSQC= C14
H5' / 1     6.880921 1*1*1 STAT=Y PRED= 6.929 RANGE= 0.197 WIDTH(Y)= 1.406 RESP(Y)= 0.9618 HSQC= C15
H2' / 1     7.674662 1*1*1 STAT=Y PRED= 7.698 RANGE= 0.247 WIDTH(Y)= 1.416 RESP(Y)= 0.9741 HSQC= C18
OH3' / 1    9.374357 1*1*1 STAT=Y PRED= 9.494 RANGE= 1.215 WIDTH(Y)= 1.780 RESP(Y)= 0.9566
OH4' / 1    9.311783 1*1*1 STAT=Y PRED= 9.682 RANGE= 1.315 WIDTH(Y)= 2.880 RESP(Y)= 0.9305
OH3 / 1     9.597692 1*1*1 STAT=Y PRED= 9.115 RANGE= 1.115 WIDTH(Y)= 2.732 RESP(Y)= 0.9341

COUPLING CONSTANTS (HZ) :
J22_23      2.0315   J H6   H8      STAT=Y PRED= 2.110 RANGE= 0.890
J27_28      8.4728   J H6'  H5'     STAT=Y PRED= 8.380 RANGE= 0.500
J27_29      2.2019   J H6'  H2'     STAT=Y PRED= 2.080 RANGE= 0.800
J28_29      0.4659   J H5'  H2'     STAT=Y PRED= 0.460 RANGE= 0.320

CONTROL PARAMETERS:
Solvent = none (def. 99% enriched)
1.000 = Concentration (vol%, def=1.0%)
0.001000000 = Minimum line-intensity
0.001000000 = Diagonalization criterium (not in use)
14.003433391 = Left frequency (ppm)
0.000000000 = Right frequency (ppm)
0.000 = Acquisition time (s, for QMTLS)
1.402 = Line-width (for modes D, P & T, 0=use defaults)
0.068609932 = Data-point resolution (Hz)
37.540 = GAUSSIAN (% , 0=use default from INF)
5.203 = Dispersion contribution (% , 0=use default from INF)
0.000000000 = Decoupling frequency (for DORES)

CONSTRAINTS (in equations X0 = 1.0)...use no empty lines

END of FILE
```

S17.  $^1\text{H}$  NMR spectrum of Quercetin (**6**, DMSO- $d_6$ , 600 MHz).

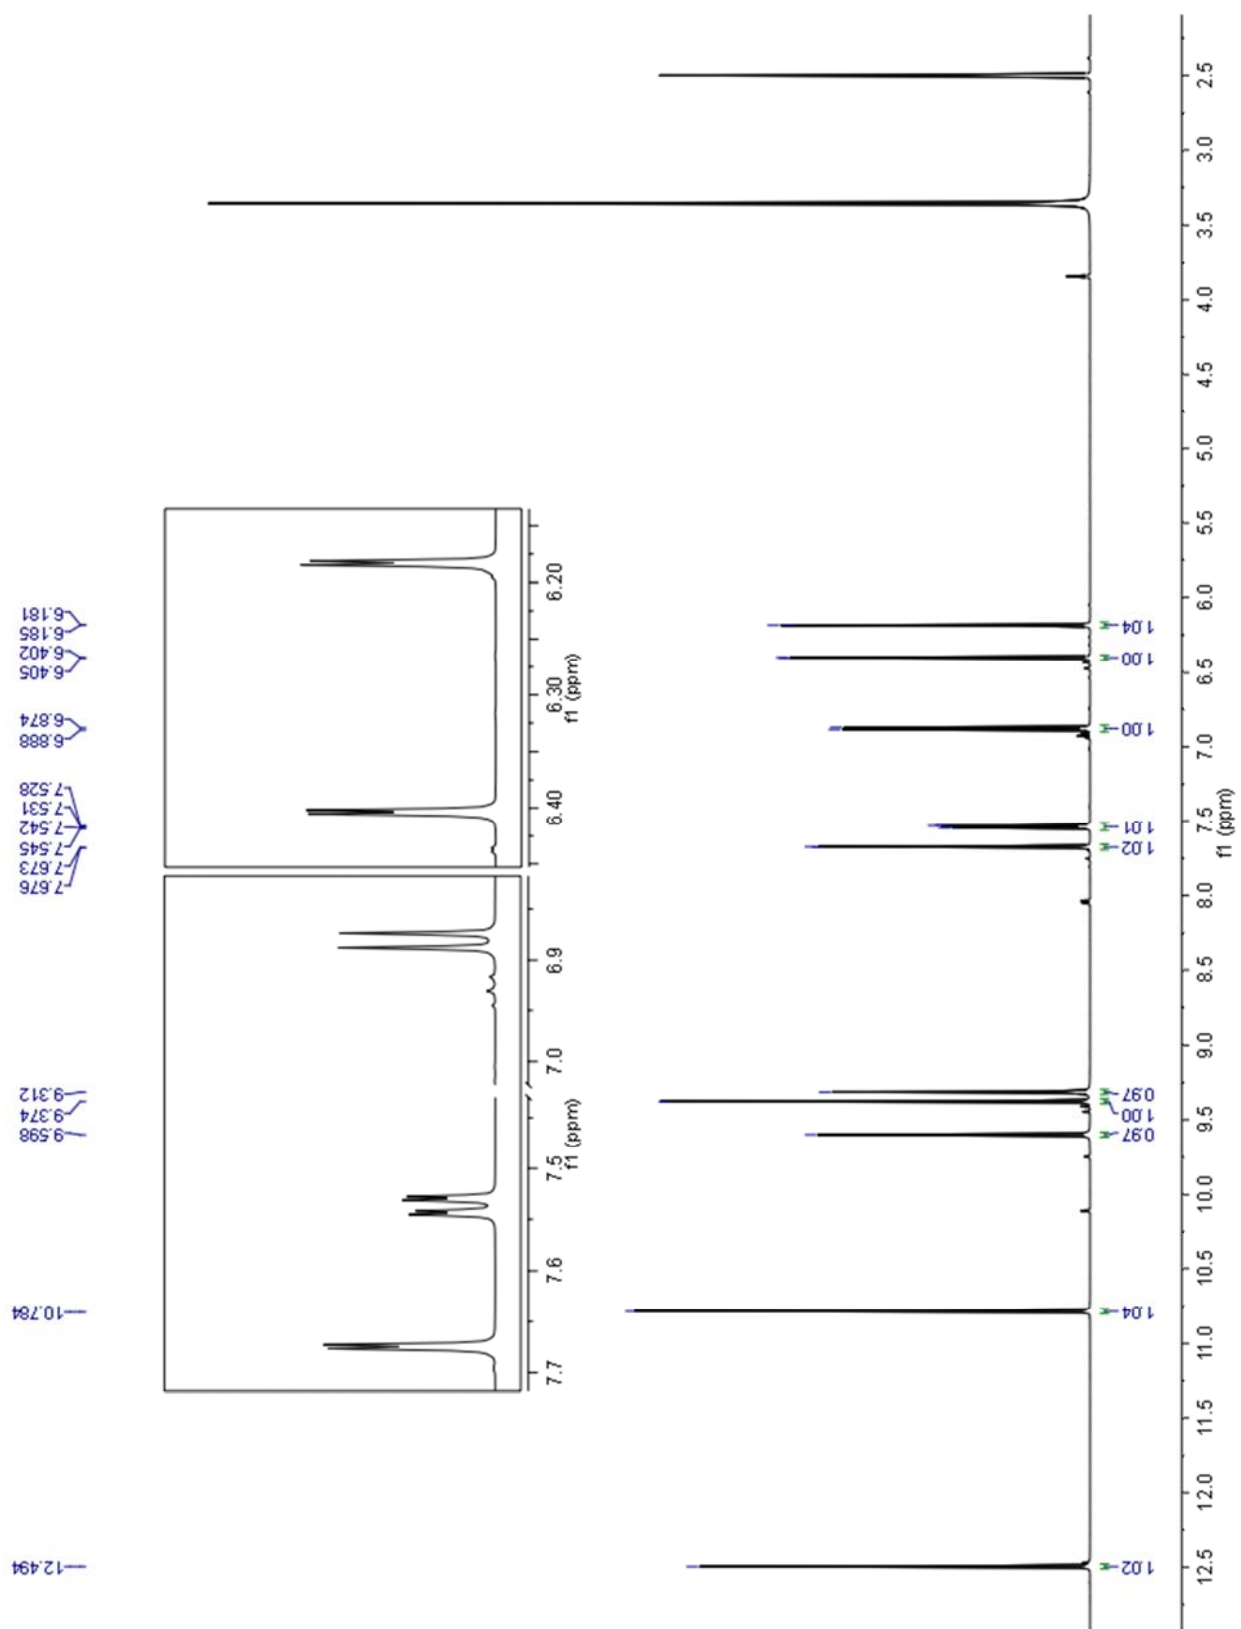

**S18.**  $^1\text{H}$ ,  $^1\text{H}$ -COSY experiment of Quercetin (**6**,  $\text{DMSO-}d_6$ , 600 MHz).

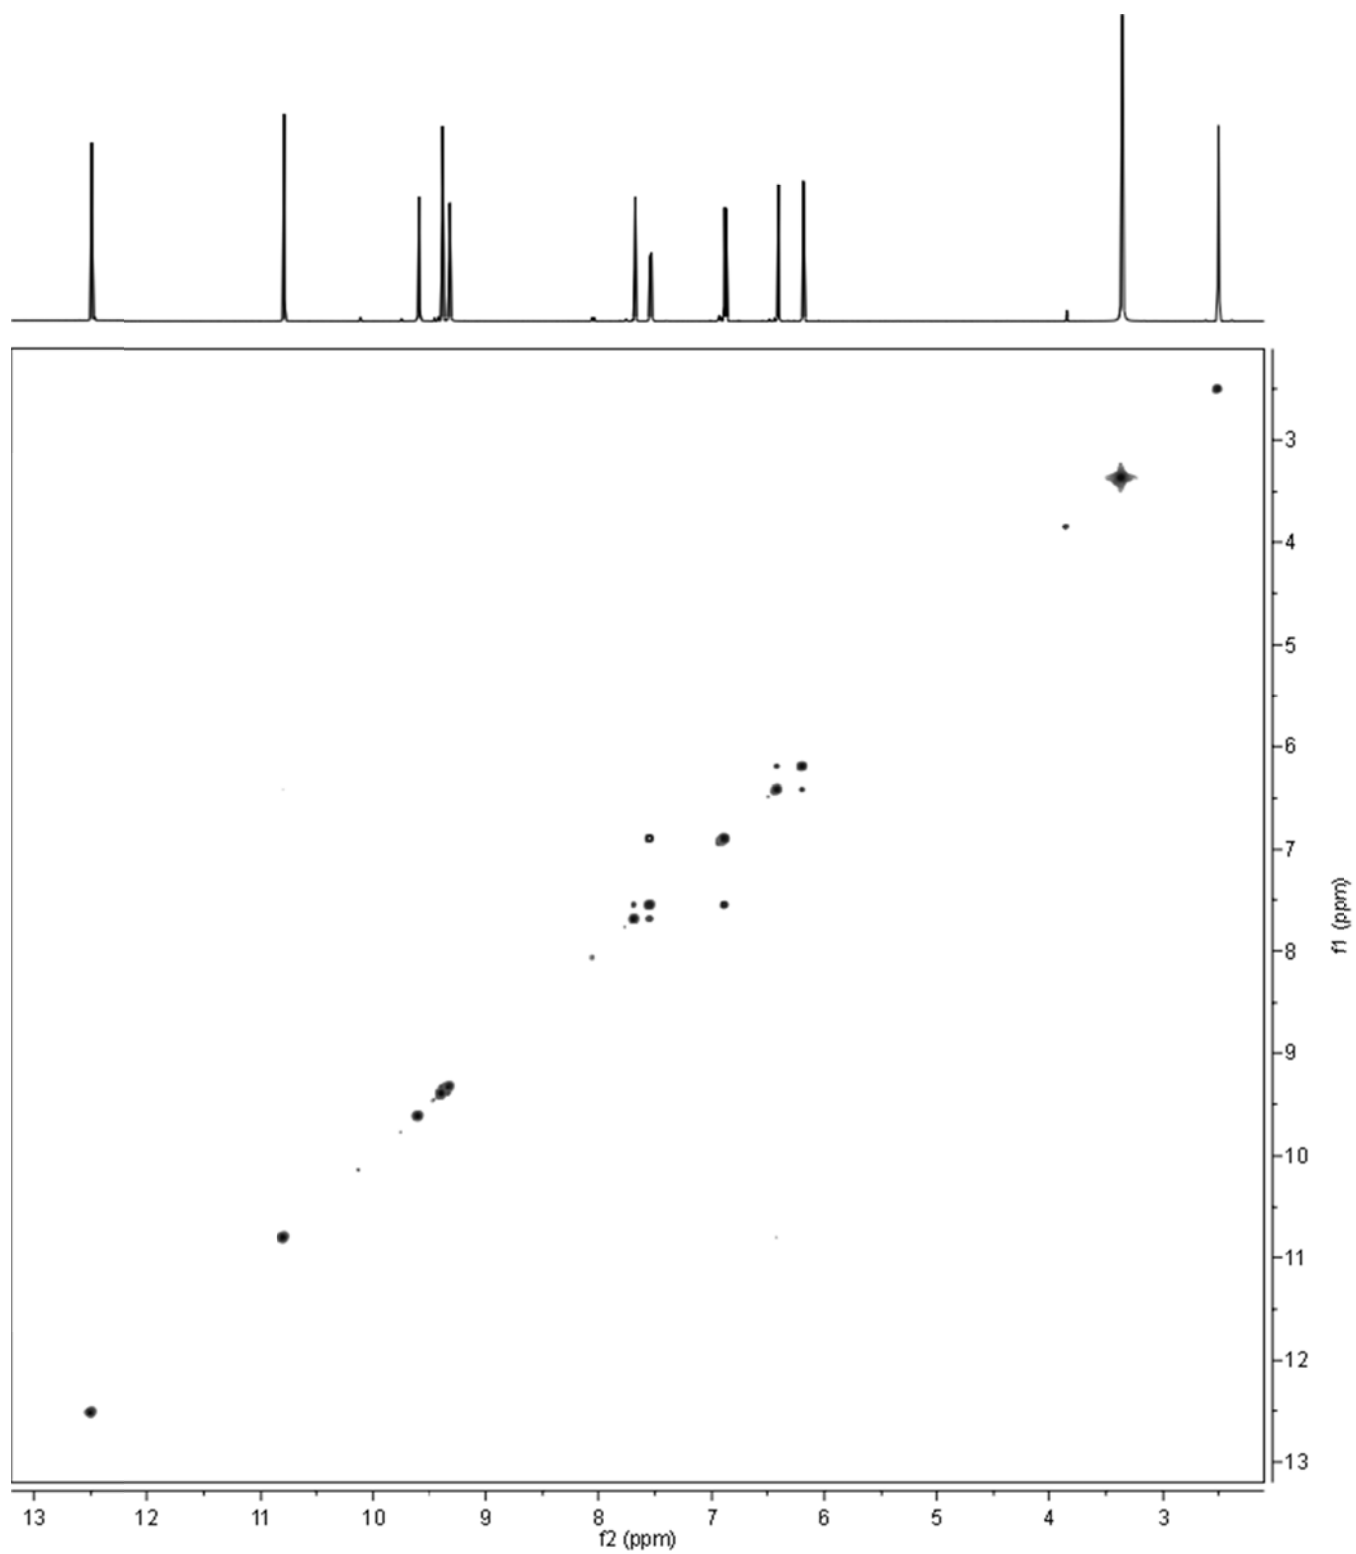

## S19. The <sup>1</sup>H Fingerprint of Kaempferol (7) in the PERCH .PMS file format.

```
* NEW: the lines beginning by * are comment lines !
* To keep all the chemical shifts fixed during iteration
* replace "CHEMICAL SHIFTS(HZ):" by "..SHIFTS(HZ): fixed"
* The couplings can be fixed in the same way

NMR-data: C:\Users\jgnapo_2\Documents\users\jgnapo\perch\Ginkgo\Flavonoids\
#$œ Date 20.10.2011; Time 17: 5:18      perch.3rd

CHEMICAL SHIFTS (PPM) :
PROTON      2*SPIN= 1 SPECIES=1H      POPULATION(Y)= 1.00000
H3'_5'/ 1    6.922821 1*2*1  STAT=Y  PRED= 6.925 RANGE= 0.177 WIDTH(Y)= 1.511 RESP(Y)= 0.9770 HSQC= C15_17
H6      / 1    6.186969 1*1*1  STAT=Y  PRED= 6.295 RANGE= 0.252 WIDTH(Y)= 1.406 RESP(Y)= 1.0000 HSQC= C2
H8      / 1    6.435905 1*1*1  STAT=Y  PRED= 6.468 RANGE= 0.172 WIDTH(Y)= 1.404 RESP(Y)= 0.9947 HSQC= C4
OH7     / 1    10.788285 1*1*1  STAT=Y  PRED= 10.903 RANGE= 0.985 WIDTH(Y)= 17.150 RESP(Y)= 0.8071
OH5     / 1    12.484003 1*1*1  STAT=Y  PRED= 13.446 RANGE= 0.850 WIDTH(Y)= 1.739 RESP(Y)= 0.9625
H2'_6'/ 1    8.041525 1*2*1  STAT=Y  PRED= 8.080 RANGE= 0.252 WIDTH(Y)= 1.495 RESP(Y)= 0.9722 HSQC= C14_18
OH4'   / 1    9.408526 1*1*1  STAT=Y  PRED= 9.807 RANGE= 1.500 WIDTH(Y)= 11.480 RESP(Y)= 0.8274
OH3    / 1    10.109684 1*1*1  STAT=Y  PRED= 9.155 RANGE= 1.070 WIDTH(Y)= 11.760 RESP(Y)= 0.8250

COUPLING CONSTANTS (HZ) :
J21_28    2.4778  J H3'_5' H3'_5'  STAT=Y  PRED= 2.710 RANGE= 0.700
J21_27    0.2690  J H2'_6' H3'_5'  STAT=Y  PRED= 0.460 RANGE= 0.320
J21_29    8.7801  J H3'_5' H2'_6'  STAT=Y  PRED= 8.530 RANGE= 0.440
J22_23    2.0325  J H6      H8      STAT=Y  PRED= 2.110 RANGE= 0.890
J29_27    2.4747  J H2'_6' H2'_6'  STAT=Y  PRED= 2.380 RANGE= 0.700

CONTROL PARAMETERS:
Solvent = none (def. 99% enriched)
1.000 = Concentration (vol%, def=1.0%)
0.00100000 = Minimum line-intensity
0.00100000 = Diagonalization criterium (not in use)
13.07908736 = Left frequency (ppm)
0.00000000 = Right frequency (ppm)
0.000 = Acquisition time (s, for QMTLS)
1.391 = Line-width (for modes D, P & T, 0=use defaults)
0.068609932 = Data-point resolution (Hz)
47.309 = GAUSSIAN (% , 0=use default from INF)
6.174 = Dispersion contribution (% , 0=use default from INF)
0.00000000 = Decoupling frequency (for DORES)

CONSTRAINTS (in equations X0 = 1.0)...use no empty lines

END of FILE
```

S20.  $^1\text{H}$  NMR spectrum of Kaempferol (7, DMSO- $d_6$ , 600 MHz).

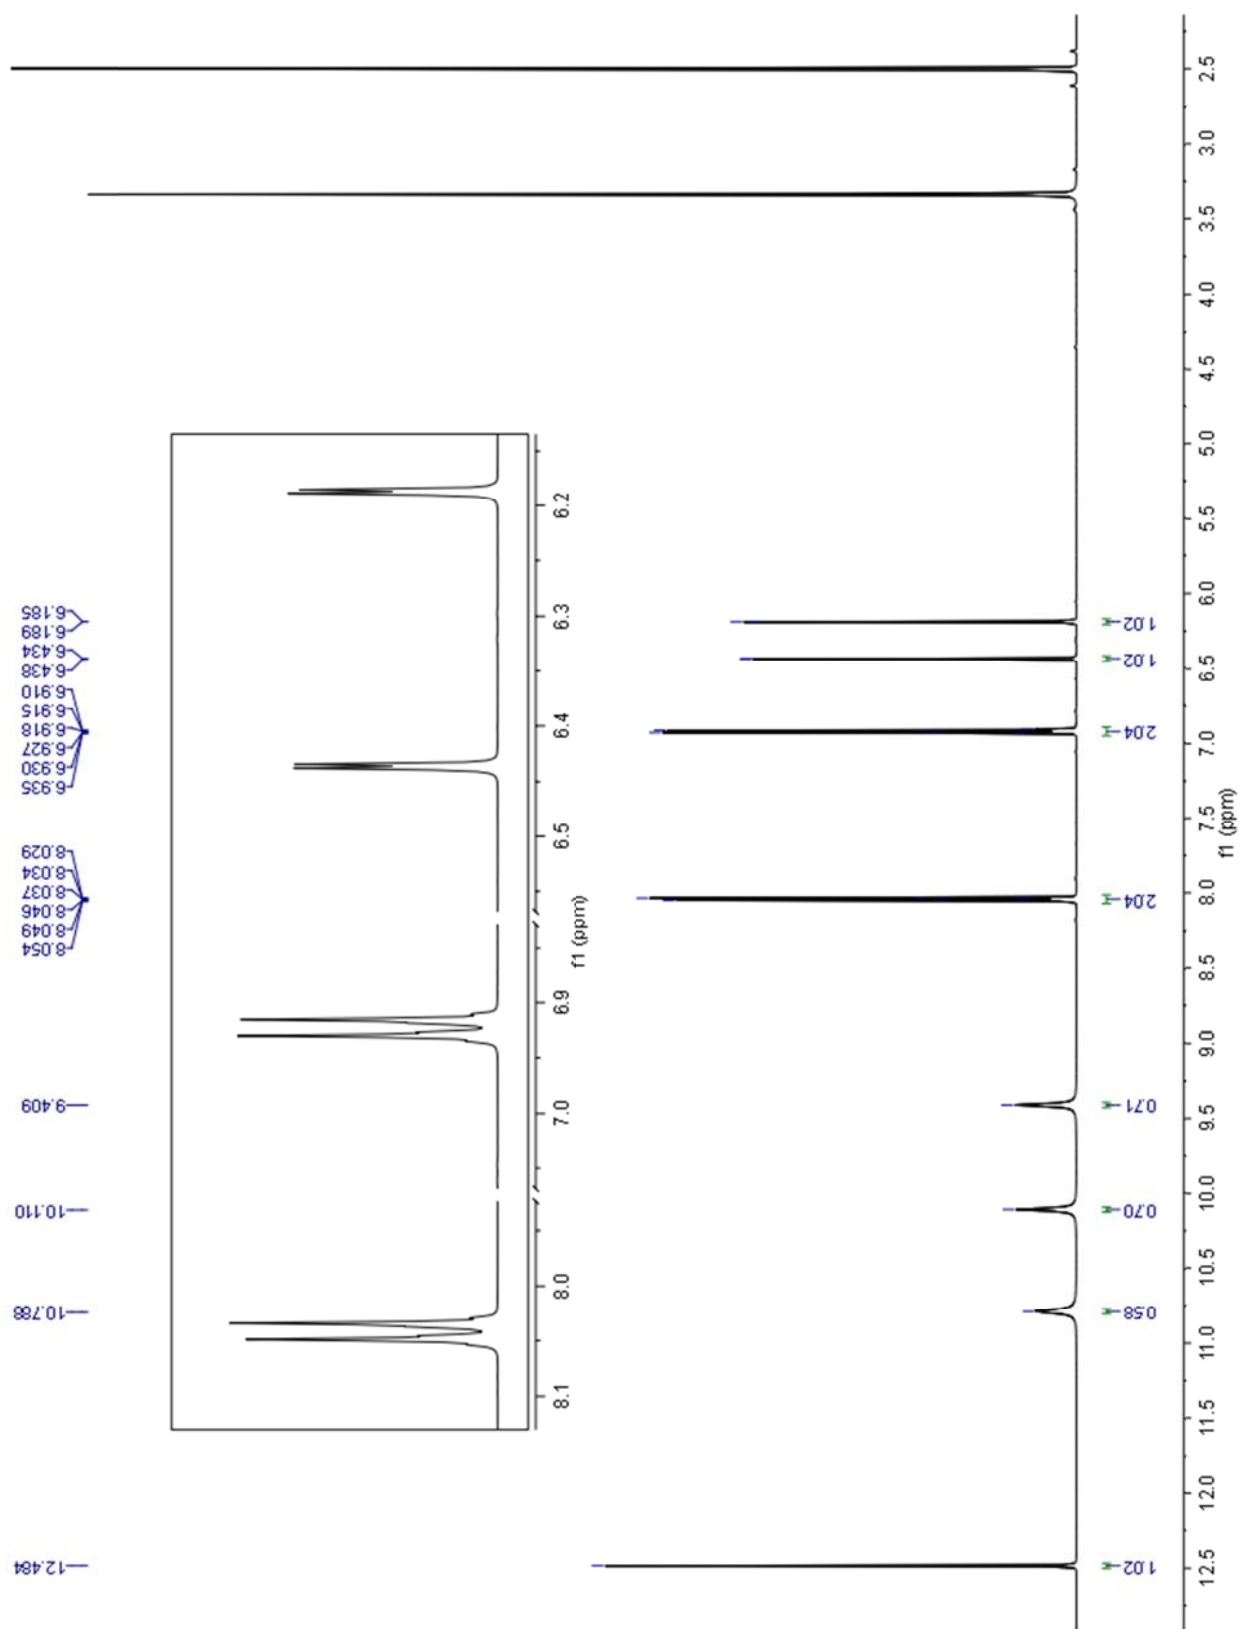

S21.  $^1\text{H}$ ,  $^1\text{H}$ -COSY experiment of Kaempferol (7, DMSO- $d_6$ , 600 MHz).

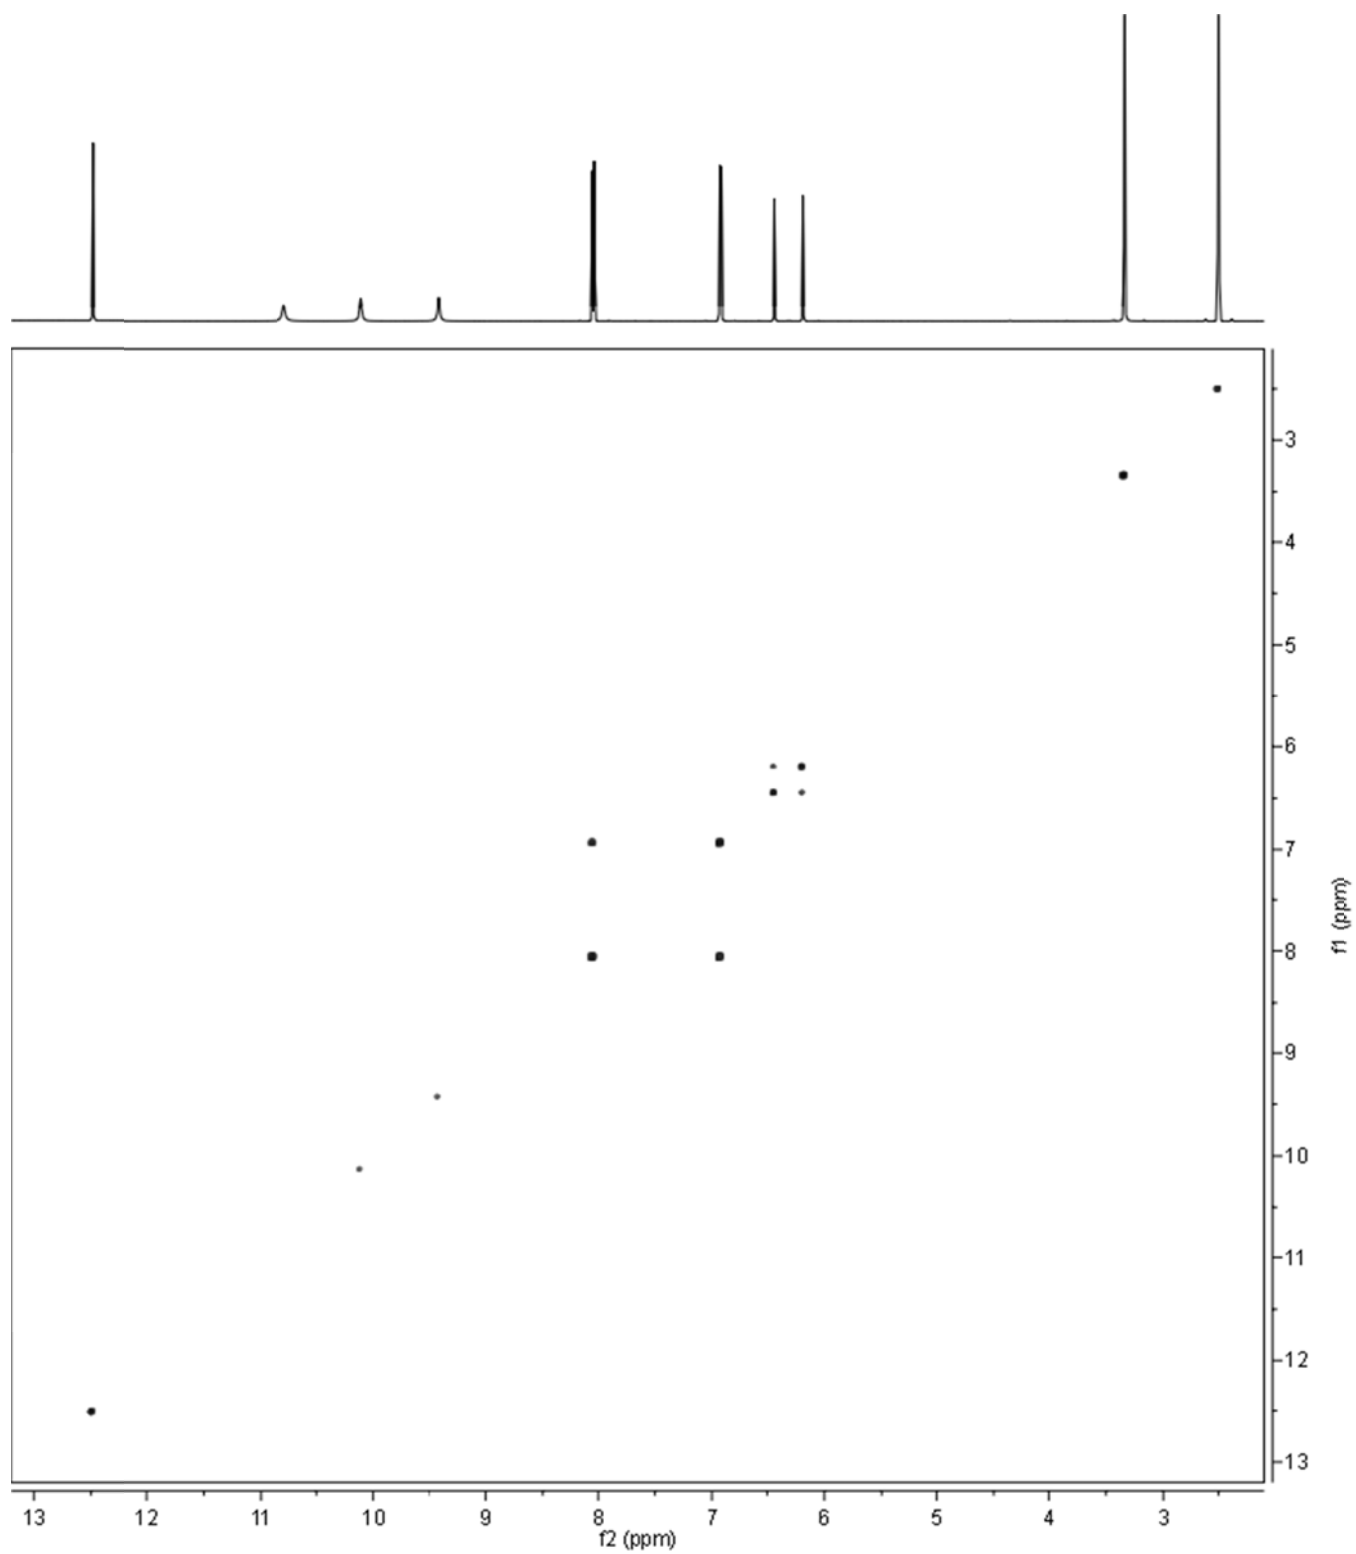



## S22. The <sup>1</sup>H Fingerprint of Isorhamnetin (8) in the PERCH .PMS file format.

\* NEW: the lines beginning by \* are comment lines !  
\* To keep all the chemical shifts fixed during iteration  
\* replace "CHEMICAL SHIFTS(HZ):" by ".SHIFTS(HZ): fixed"  
\* The couplings can be fixed in the same way

NMR-data: c:\users\jgnapo\_2\documents\users\jgnapo\perch\ginkgo\flavonoids\  
#S& Date 20.10.2011; Time 16:43:26 perch.3rd

### CHEMICAL SHIFTS (PPM):

```
PROTON  2*SPIN= 1 SPECIES=1H  POPULATION(Y)= 1.00000
H6 / 1   6.192379  1*1*1  STAT=Y  PRED= 6.306 RANGE= 0.242 WIDTH(Y)= 1.456 RESP(Y)= 0.9979 HSQC= C2
H8 / 1   6.476736  1*1*1  STAT=Y  PRED= 6.462 RANGE= 0.182 WIDTH(Y)= 1.446 RESP(Y)= 0.9882 HSQC= C4
OH7 / 1  10.773796  1*1*1  STAT=Y  PRED= 10.912 RANGE= 1.015 WIDTH(Y)= 2.985 RESP(Y)= 0.9504
OH5 / 1  12.467391  1*1*1  STAT=Y  PRED= 13.376 RANGE= 0.855 WIDTH(Y)= 1.433 RESP(Y)= 1.0000
H6' / 1  7.687450  1*1*1  STAT=Y  PRED= 7.638 RANGE= 0.297 WIDTH(Y)= 1.538 RESP(Y)= 0.9733 HSQC= C14
H5' / 1  6.936966  1*1*1  STAT=Y  PRED= 6.904 RANGE= 0.242 WIDTH(Y)= 1.475 RESP(Y)= 0.9759 HSQC= C15
H2' / 1  7.752072  1*1*1  STAT=Y  PRED= 7.676 RANGE= 0.305 WIDTH(Y)= 1.697 RESP(Y)= 0.9921 HSQC= C18
OH4' / 1  9.445056  1*1*1  STAT=Y  PRED= 9.712 RANGE= 0.752 WIDTH(Y)= 2.159 RESP(Y)= 0.9537
OH3 / 1  9.747292  1*1*1  STAT=Y  PRED= 9.072 RANGE= 1.125 WIDTH(Y)= 2.173 RESP(Y)= 0.9713
OMe / 1  3.840464  1*1*3  STAT=Y  PRED= 3.899 RANGE= 0.132 WIDTH(Y)= 1.727 RESP(Y)= 0.9945 HSQC= H20
```

### COUPLING CONSTANTS (HZ):

```
J22_23  2.0139  J H6  H8  STAT=Y  PRED= 2.110 RANGE= 0.890
J27_28  8.4712  J H6' H5'  STAT=Y  PRED= 8.340 RANGE= 0.500
J27_29  2.0570  J H6' H2'  STAT=Y  PRED= 2.080 RANGE= 0.800
J28_29  0.2967  J H5' H2'  STAT=Y  PRED= 0.460 RANGE= 0.320
```

### CONTROL PARAMETERS:

```
Solvent = none (def. 99% enriched)
1.000 = Concentration (vol%, def=1.0%)
0.001000000 = Minimum line-intensity
0.001000000 = Diagonalization criterium (not in use)
13.09593996 = Left frequency (ppm)
0.000000000 = Right frequency (ppm)
10.000 = Acquisition time (s, for QMtls)
0.000 = Line-width (for modes D, P & T, 0=use defaults)
0.071649999 = Data-point resolution (Hz)
30.935 = GAUSSIAN (% , 0=use default from INF)
-0.908 = Dispersion contribution (% , 0=use default from INF)
0.000000000 = Decoupling frequency (for DORES)
```

CONSTRAINTS (in equations X0 = 1.0)...use no empty lines

END of FILE

**S23.**  $^1\text{H}$  NMR spectrum of Isorhamnetin (**8**, DMSO- $d_6$ , 600 MHz).

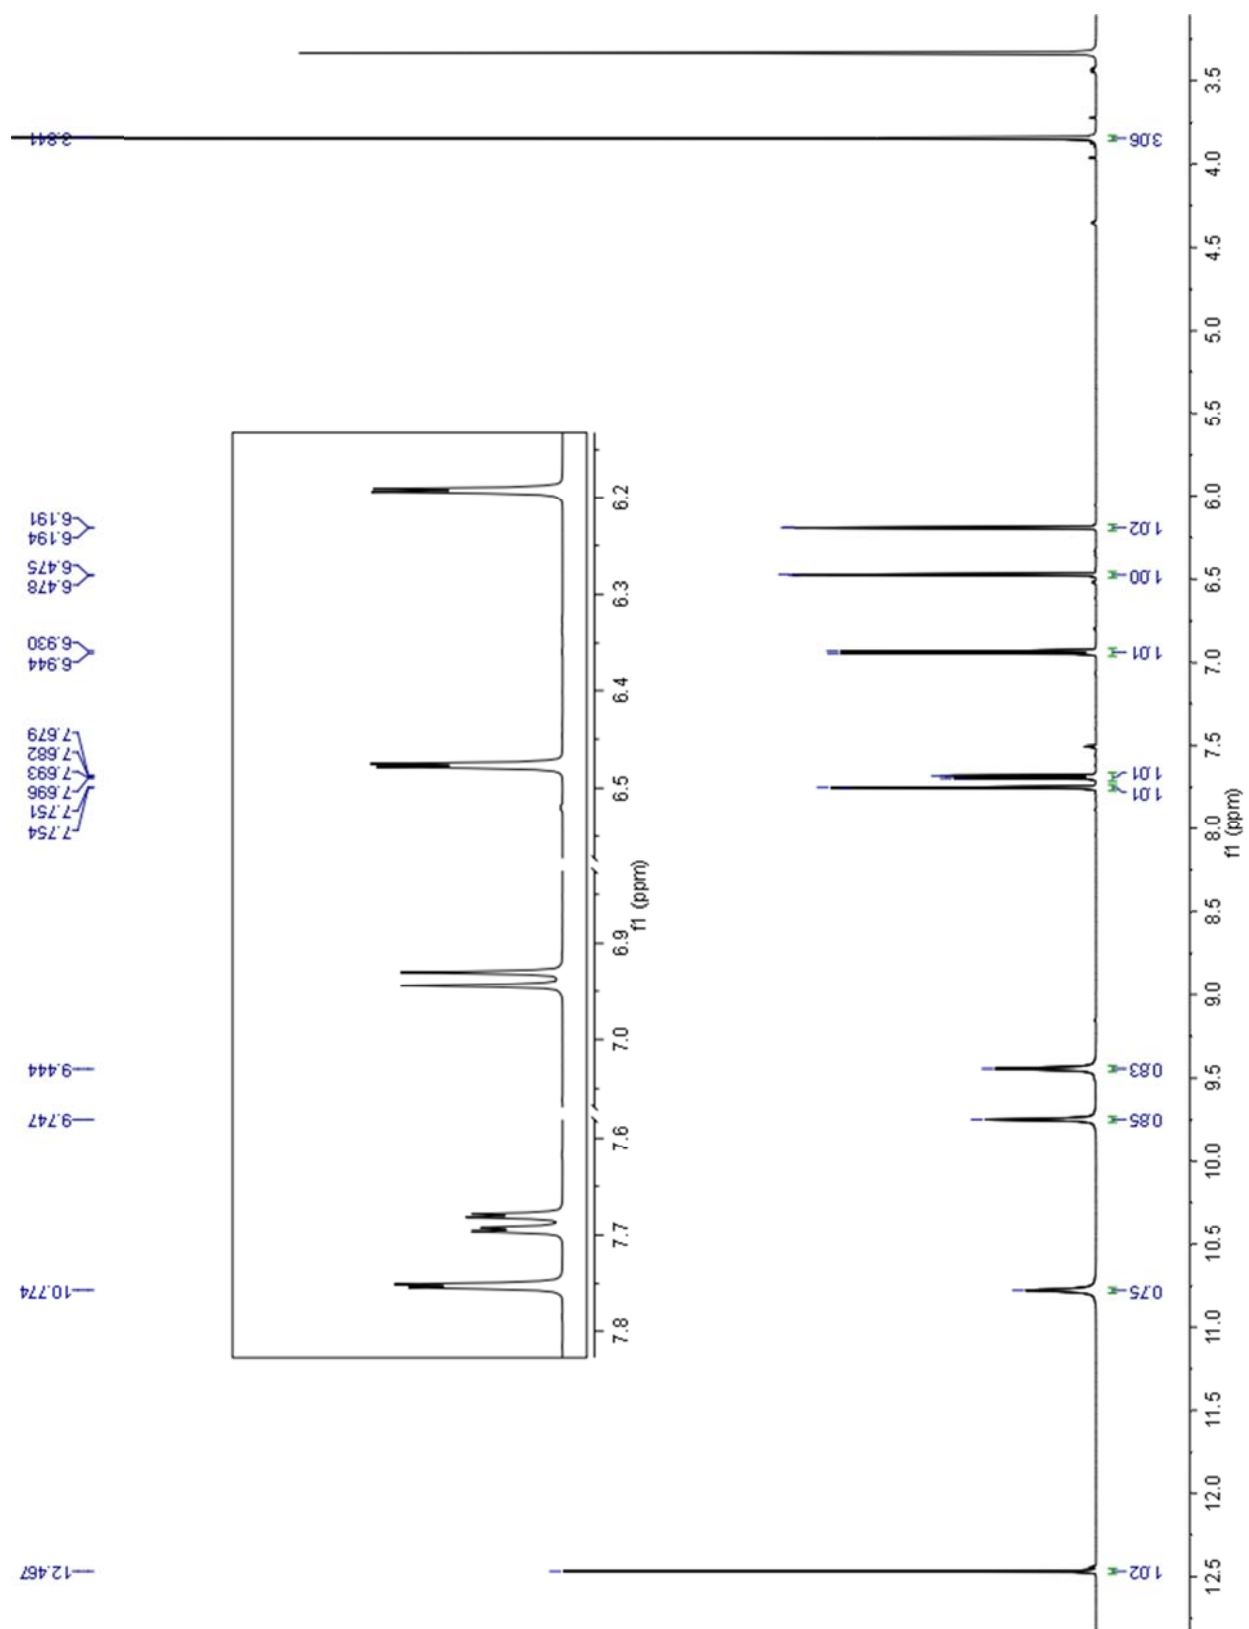

S24.  $^1\text{H}$ ,  $^1\text{H}$ -COSY experiment of Isorhamnetin (**8**, DMSO- $d_6$ , 600 MHz).

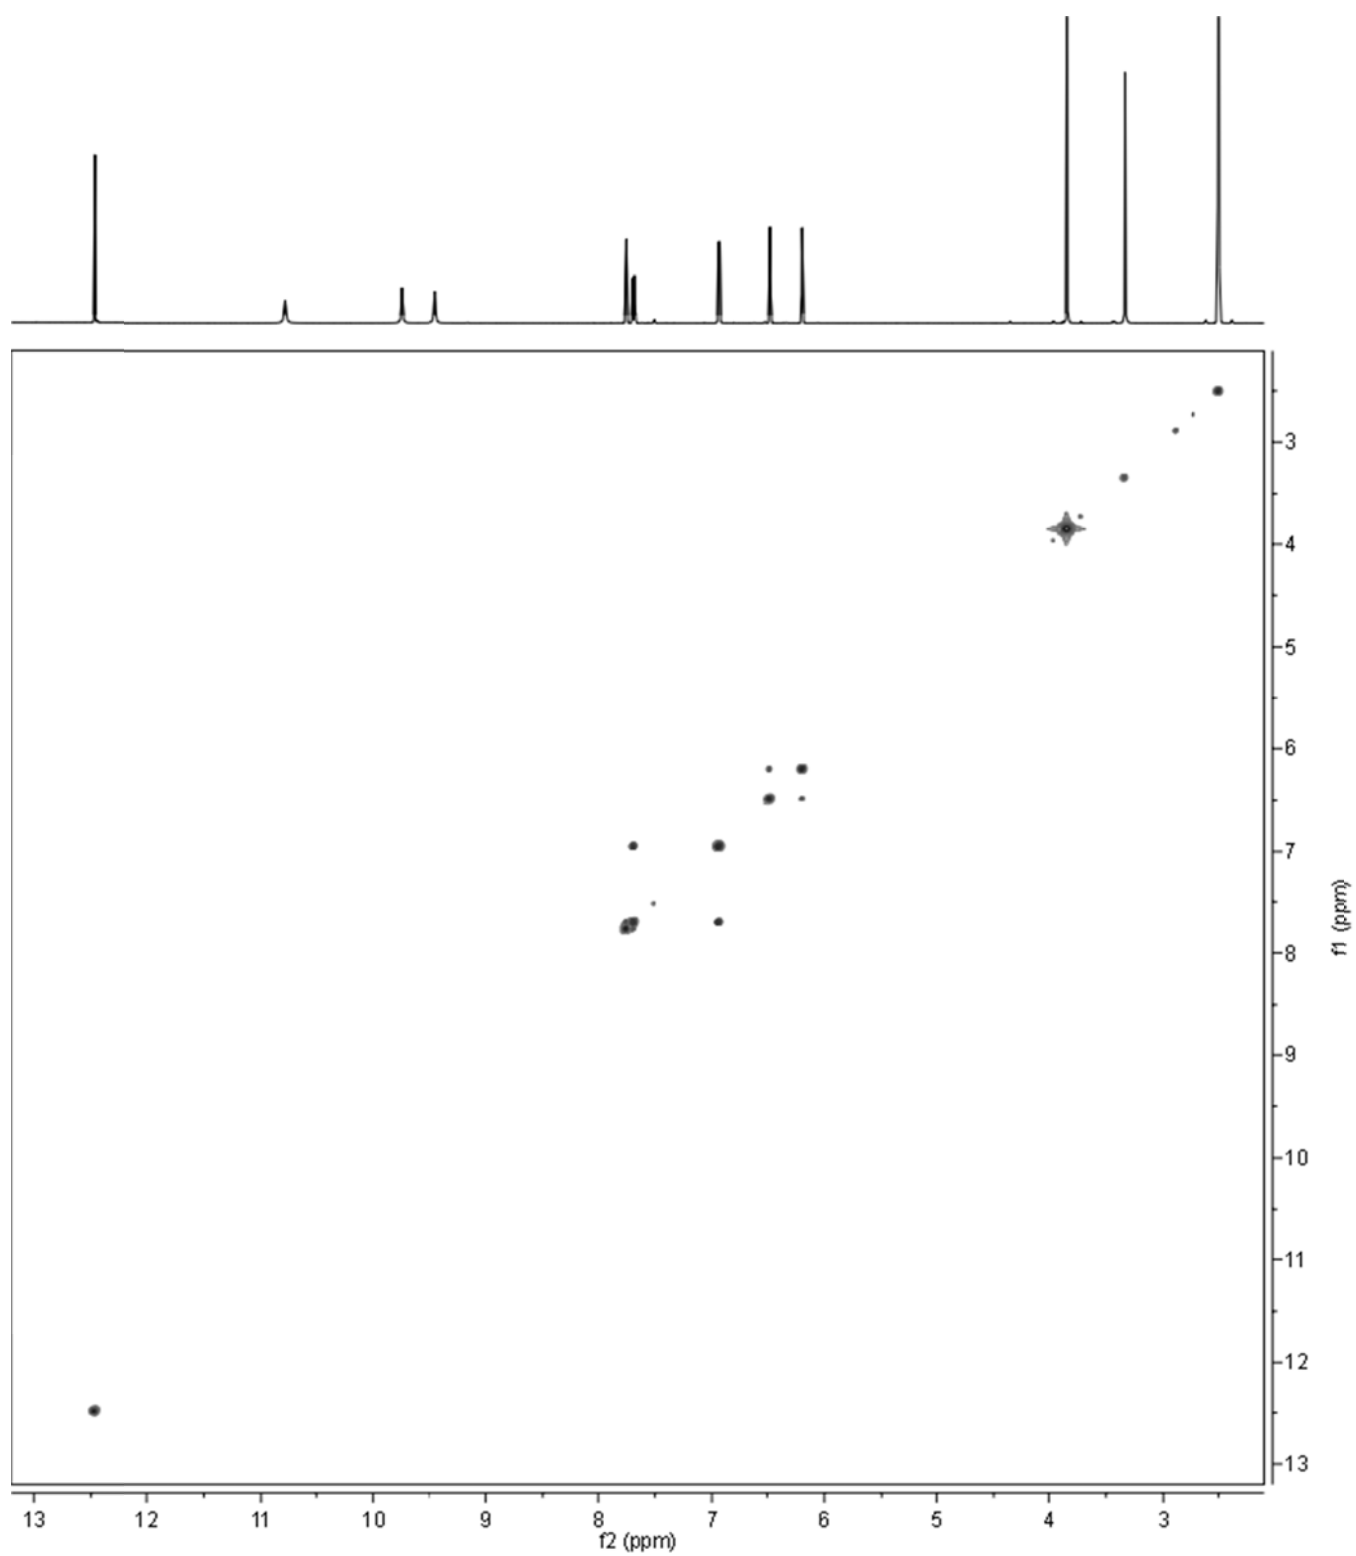

## S25. The <sup>1</sup>H Fingerprint of Rutin (9) in the PERCH .PMS file format.

\* NEW: the lines beginning by \* are comment lines !  
\* To keep all the chemical shifts fixed during iteration  
\* replace "CHEMICAL SHIFTS(HZ):" by ".SHIFTS(HZ): fixed"  
\* The couplings can be fixed in the same way

NMR-data: c:\users\jgnapo\_2\documents\users\jgnapo\perch\ginkgo\flavonoids\  
#S& Date 21.10.2011; Time 0:33:18 perch.5TH

CHEMICAL SHIFTS(PPM): Similarity% = 16.777

```
PROTON  2*SPIN= 1 SPECIES=1H  POPULATION(Y)= 1.00000
H6 / 1 6.190056 1*1*1 STAT=Y PRED= 6.412 RANGE= 0.305 WIDTH(Y)= 1.062 RESP(Y)= 0.9766 HSQC= C2
H8 / 1 6.380863 1*1*1 STAT=Y PRED= 6.581 RANGE= 0.362 WIDTH(Y)= 1.055 RESP(Y)= 0.9738 HSQC= C4
OH7 / 1 10.829194 1*1*1 STAT=Y PRED= 10.802 RANGE= 1.260 WIDTH(Y)= 6.056 RESP(Y)= 0.7582
OH5 / 1 12.599850 1*1*1 STAT=Y PRED= 13.831 RANGE= 0.985 WIDTH(Y)= 1.142 RESP(Y)= 1.0000
H6' / 1 7.537800 1*1*1 STAT=Y PRED= 7.839 RANGE= 0.327 WIDTH(Y)= 1.146 RESP(Y)= 0.9079 HSQC= C14
H5' / 1 6.836057 1*1*1 STAT=Y PRED= 7.028 RANGE= 0.445 WIDTH(Y)= 1.149 RESP(Y)= 0.9452 HSQC= C15
H2' / 1 7.525994 1*1*1 STAT=Y PRED= 7.813 RANGE= 0.392 WIDTH(Y)= 1.146 RESP(Y)= 0.9585 HSQC= C18
OH3' / 1 9.671753 1*1*1 STAT=Y PRED= 9.599 RANGE= 1.830 WIDTH(Y)= 9.146 RESP(Y)= 0.7385
OH4' / 1 9.182772 1*1*1 STAT=Y PRED= 9.443 RANGE= 1.775 WIDTH(Y)= 6.955 RESP(Y)= 0.7480
Glc-1 / 1 5.341488 1*1*1 STAT=Y PRED= 5.565 RANGE= 0.342 WIDTH(Y)= 1.356 RESP(Y)= 0.9078 HSQC= H21
Glc-2 / 1 3.219724 1*1*1 STAT=Y PRED= 3.526 RANGE= 0.200 WIDTH(Y)= 1.897 RESP(Y)= 0.9171 HSQC= C23
Glc-5 / 1 3.238384 1*1*1 STAT=Y PRED= 3.485 RANGE= 0.247 WIDTH(Y)= 2.050 RESP(Y)= 0.8314 HSQC= C25
Glc-3 / 1 3.204949 1*1*1 STAT=Y PRED= 3.317 RANGE= 0.155 WIDTH(Y)= 2.091 RESP(Y)= 0.8548 HSQC= C26
Glc-4 / 1 3.047931 1*1*1 STAT=Y PRED= 3.387 RANGE= 0.287 WIDTH(Y)= 2.008 RESP(Y)= 0.8374 HSQC= C27
OH-Glc-2/ 1 5.286398 1*1*1 STAT=Y PRED= 5.633 RANGE= 1.215 WIDTH(Y)= 1.765 RESP(Y)= 0.8978
Glc-6 / 1 3.281188 1*1*1 STAT=Y PRED= 3.351 RANGE= 0.450 WIDTH(Y)= 2.220 RESP(Y)= 0.8318 HSQC= C29
Glc-6' / 1 3.701113 1*1*1 STAT=Y PRED= 3.509 RANGE= 0.232 WIDTH(Y)= 2.257 RESP(Y)= 0.8536 HSQC= C29
OH-Glc-3/ 1 5.115871 1*1*1 STAT=Y PRED= 4.296 RANGE= 1.420 WIDTH(Y)= 2.048 RESP(Y)= 0.8798
OH-Glc-4/ 1 5.074713 1*1*1 STAT=Y PRED= 4.702 RANGE= 1.568 WIDTH(Y)= 2.000 RESP(Y)= 0.8679
Rh-1 / 1 4.376166 1*1*1 STAT=Y PRED= 4.453 RANGE= 0.300 WIDTH(Y)= 1.672 RESP(Y)= 0.9527 HSQC= C33
Rh-5 / 1 3.265194 1*1*1 STAT=Y PRED= 2.961 RANGE= 0.627 WIDTH(Y)= 1.684 RESP(Y)= 0.9335 HSQC= C36
Rh-Me / 1 0.987386 1*1*3 STAT=Y PRED= 0.586 RANGE= 0.262 WIDTH(Y)= 1.730 RESP(Y)= 0.8538 HSQC= C40
Rh-4 / 1 3.067177 1*1*1 STAT=Y PRED= 2.968 RANGE= 0.287 WIDTH(Y)= 3.477 RESP(Y)= 0.9349 HSQC= C37
Rh-2 / 1 3.383564 1*1*1 STAT=Y PRED= 3.609 RANGE= 0.242 WIDTH(Y)= 2.395 RESP(Y)= 0.9502 HSQC= C38
Rh-3 / 1 3.275197 1*1*1 STAT=Y PRED= 3.082 RANGE= 0.582 WIDTH(Y)= 2.131 RESP(Y)= 0.8779 HSQC= C39
OH-Rh-2 / 1 4.350559 1*1*1 STAT=Y PRED= 4.719 RANGE= 1.395 WIDTH(Y)= 4.049 RESP(Y)= 0.7880
OH-Rh-3 / 1 4.400478 1*1*1 STAT=Y PRED= 4.127 RANGE= 1.613 WIDTH(Y)= 3.183 RESP(Y)= 0.8379
OH-Rh-4 / 1 4.534535 1*1*1 STAT=Y PRED= 4.732 RANGE= 1.673 WIDTH(Y)= 10.065 RESP(Y)= 0.8554
```

COUPLING CONSTANTS(HZ): Similarity% = 36.900

```
J22_23 2.0571 J H6 H8 STAT=Y PRED= 2.110 RANGE= 1.790
J27_28 8.4604 J H6' H5' STAT=Y PRED= 8.380 RANGE= 1.000
J27_29 2.2300 J H6' H2' STAT=Y PRED= 2.080 RANGE= 1.600
J28_29 0.2251 J H5' H2' STAT=Y PRED= 0.460 RANGE= 0.640
J38_40 7.7199 J Glc-1 Glc-2 STAT=Y PRED= 7.190 RANGE= 3.580
J40_43 9.0266 J Glc-2 Glc-3 STAT=Y PRED= 8.920 RANGE= 3.580
J40_48 4.7130 J Glc-2 OH-Glc-2 STAT=Y PRED= 4.300 RANGE= 1.000
J41_46 9.8132 J Glc-5 Glc-4 STAT=Y PRED= 10.550 RANGE= 2.560
J41_49 6.9219 J Glc-5 Glc-6 STAT=Y PRED= 2.700 RANGE= 3.000
J41_50 1.7617 J Glc-5 Glc-6' STAT=Y PRED= 1.280 RANGE= 3.000
J43_46 8.7207 J Glc-3 Glc-4 STAT=Y PRED= 9.140 RANGE= 3.580
J43_51 4.8865 J Glc-3 OH-Glc-3 STAT=Y PRED= 4.300 RANGE= 1.000
J46_52 5.8261 J Glc-4 OH-Glc-4 STAT=Y PRED= 4.300 RANGE= 1.000
J49_50 -11.2374 J Glc-6 Glc-6' STAT=Y PRED= -12.300 RANGE= 0.800
J56_68 1.5856 J Rh-1 Rh-2 STAT=Y PRED= 2.330 RANGE= 2.800
J57_59 6.2129 J Rh-5 Rh-Me STAT=Y PRED= 6.250 RANGE= 0.600
J57_66 9.2814 J Rh-5 Rh-4 STAT=Y PRED= 9.940 RANGE= 3.580
J66_69 9.5011 J Rh-4 Rh-3 STAT=Y PRED= 9.590 RANGE= 3.580
J66_73 3.6210 J Rh-4 OH-Rh-4 STAT=Y PRED= 4.300 RANGE= 1.000
J68_69 3.0081 J Rh-2 Rh-3 STAT=Y PRED= 3.420 RANGE= 3.800
J68_71 4.0866 J Rh-2 OH-Rh-2 STAT=Y PRED= 4.440 RANGE= 1.500
J69_72 5.6937 J Rh-3 OH-Rh-3 STAT=Y PRED= 4.300 RANGE= 1.000
```

CONTROL PARAMETERS:

```
Solvent = none (def. 99% enriched)
1.000 = Concentration (vol%, def=1.0%)
0.001000000 = Minimum line-intensity
0.001000000 = Diagonalization criterium (not in use)
13.25602790 = Left frequency (ppm)
0.000000000 = Right frequency (ppm)
10.000 = Acquisition time (s, for QMTPS)
1.046 = Line-width (for modes D, P & T, 0=use defaults)
0.068609922 = Data-point resolution (Hz)
70.615 = GAUSSIAN (% , 0=use default from INF)
-1.053 = Dispersion contribution (% , 0=use default from INF)
0.000000000 = Decoupling frequency (for DORES)
```

CONSTRAINTS (in equations X0 = 1.0)...use no empty lines

END of FILE



S27.  $^1\text{H}$ ,  $^1\text{H}$ -COSY experiment of Rutin (**9**, DMSO- $d_6$ , 600 MHz).

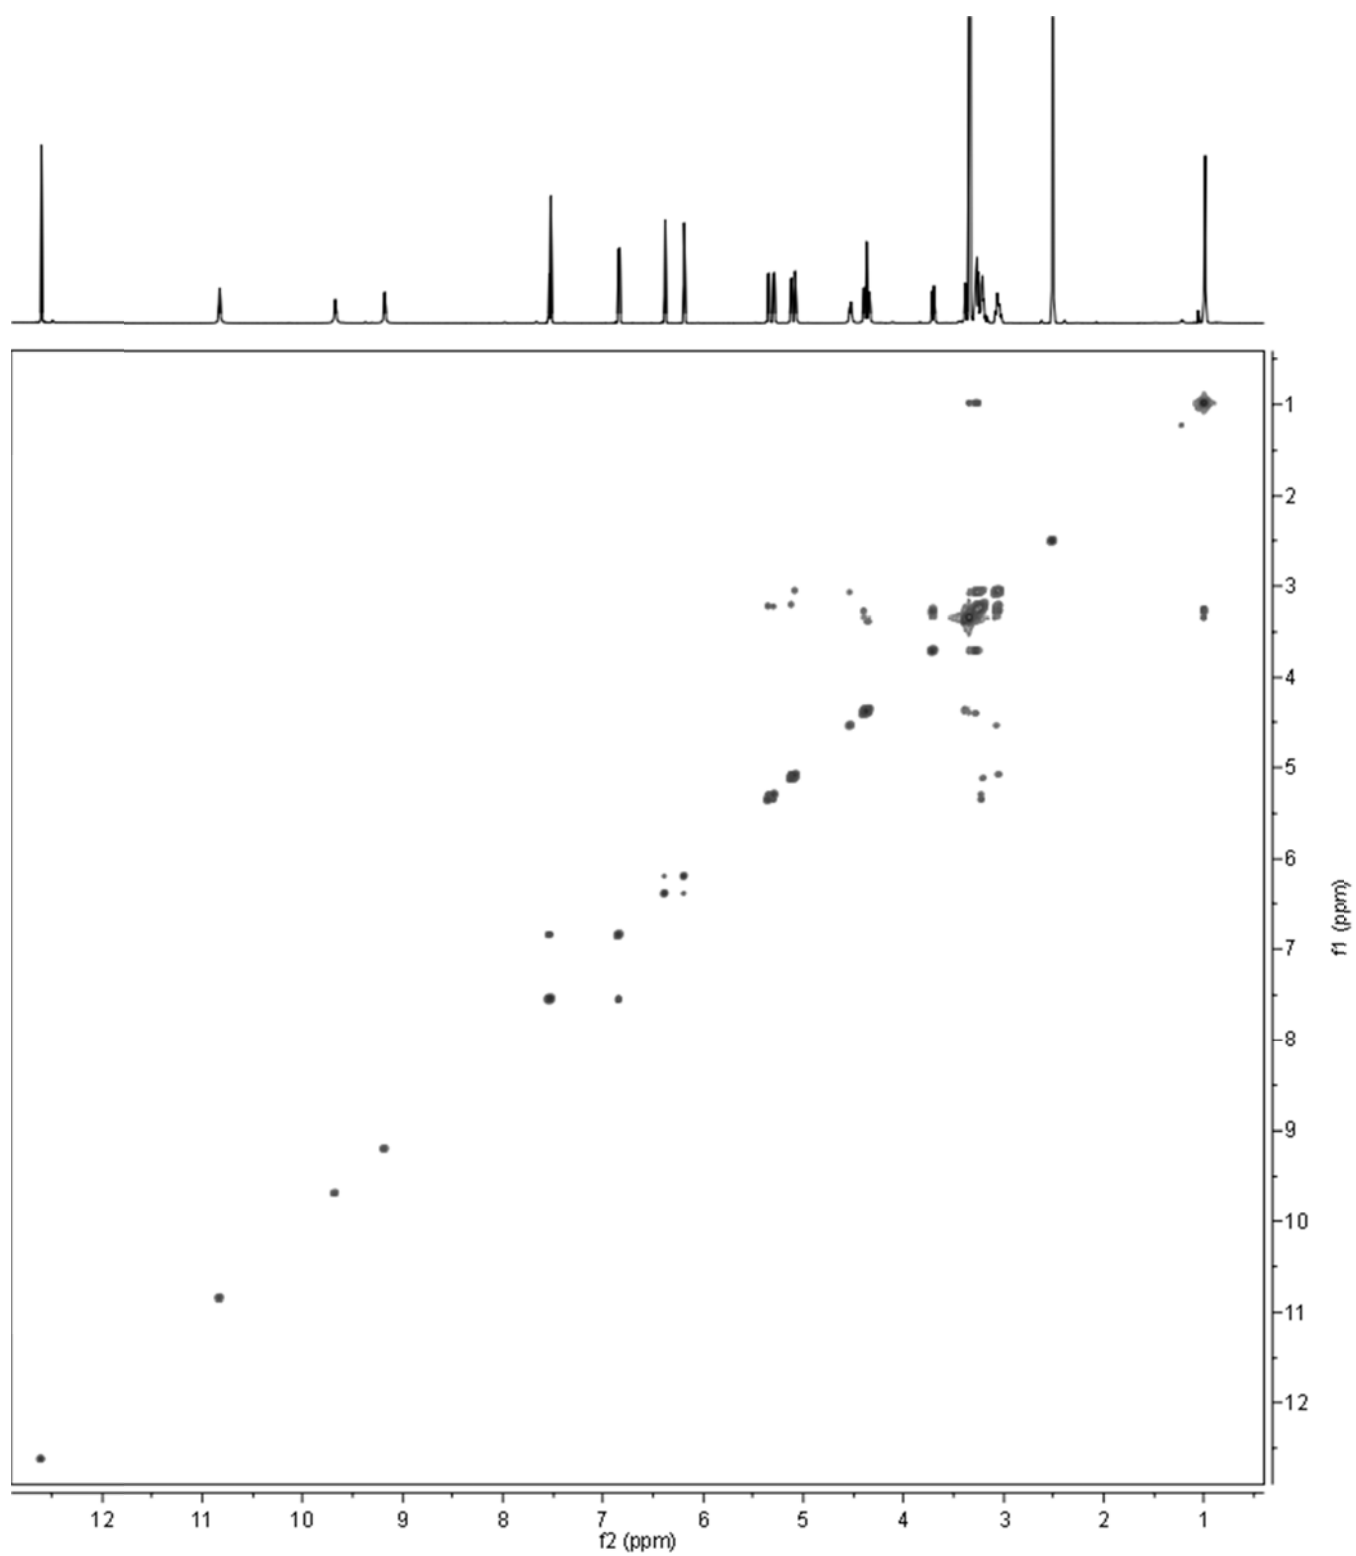

## S28. Combined <sup>1</sup>H Fingerprints of nine *Ginkgo biloba* constituents (1-9) in the PERCH .PMS file format.

\* NEW: the lines beginning by \* are comment lines !  
 \* To keep all the chemical shifts fixed during iteration  
 \* replace "CHEMICAL SHIFTS(HZ):" by ".SHIFTS(HZ): fixed"  
 \* The couplings can be fixed in the same way

NMR-data: C:\Users\jgnapo\_2\Documents\jgnapo\perch\Ginkgo\  
 #Date 10. 15.2011; Time 15: 5:45 Ginkgo.5TH

CHEMICAL SHIFTS (PPM):

```

BILOBALIDE 2*SPIN= 1 SPECIES=1H POPULATION(Y)= 1.00000
BB-OH-10 / 1 7.253250 1*1*1 STAT=Y PRED= 4.828 RANGE= 1.750 WIDTH(Y)= 1.600 RESP(Y)= 0.9729
BB-H-7beta / 1 2.077084 1*1*1 STAT=Y PRED= 1.896 RANGE= 0.357 WIDTH(Y)= 1.891 RESP(Y)= 0.9170 HSQC= C14
BB-H-6 / 1 4.916794 1*1*1 STAT=Y PRED= 4.888 RANGE= 0.282 WIDTH(Y)= 1.768 RESP(Y)= 0.9697 HSQC= C13
BB-H-7alpha / 1 2.561866 1*1*1 STAT=Y PRED= 2.518 RANGE= 0.282 WIDTH(Y)= 1.976 RESP(Y)= 0.8993 HSQC= C14
BB-H-10 / 1 5.149952 1*1*1 STAT=Y PRED= 4.165 RANGE= 0.370 WIDTH(Y)= 1.774 RESP(Y)= 0.9421 HSQC= C17
BB-H-12 / 1 6.274102 1*1*1 STAT=Y PRED= 5.659 RANGE= 0.102 WIDTH(Y)= 1.500 RESP(Y)= 1.0000 HSQC= C19
BB-t-Butyl / 1 1.034063 1*1*9 STAT=Y PRED= 0.914 RANGE= 0.237 WIDTH(Y)= 2.678 RESP(Y)= 0.9023 HSQC= C25-27
BB-OH-8 / 1 5.403089 1*1*1 STAT=Y PRED= 3.979 RANGE= 1.923 WIDTH(Y)= 1.508 RESP(Y)= 0.9843
BB-H-1beta / 1 2.774028 1*1*1 STAT=Y PRED= 2.359 RANGE= 0.370 WIDTH(Y)= 1.686 RESP(Y)= 0.9603 HSQC= #27
BB-H-1alpha / 1 2.897044 1*1*1 STAT=Y PRED= 2.405 RANGE= 0.462 WIDTH(Y)= 1.740 RESP(Y)= 0.9580 HSQC= #27
GINKGOLIDE_A 2*SPIN= 1 SPECIES=1H POPULATION(Y)= 1.00000
GA-OH-3 / 2 6.378972 1*1*1 STAT=Y PRED= 4.856 RANGE= 1.805 WIDTH(Y)= 1.273 RESP(Y)= 1.0000
GA-OH-10 / 2 6.814323 1*1*1 STAT=Y PRED= 4.509 RANGE= 1.630 WIDTH(Y)= 1.565 RESP(Y)= 0.9632
GA-H-7beta / 2 2.043863 1*1*1 STAT=Y PRED= 2.070 RANGE= 0.557 WIDTH(Y)= 2.501 RESP(Y)= 0.8989 HSQC= C14
GA-H-1beta / 2 1.805711 1*1*1 STAT=Y PRED= 1.401 RANGE= 0.302 WIDTH(Y)= 1.882 RESP(Y)= 0.9213 HSQC= C8
GA-H-1alpha / 2 2.750139 1*1*1 STAT=Y PRED= 2.169 RANGE= 0.387 WIDTH(Y)= 1.927 RESP(Y)= 0.9005 HSQC= C8
GA-H-2 / 2 4.833738 1*1*1 STAT=Y PRED= 4.895 RANGE= 0.262 WIDTH(Y)= 1.798 RESP(Y)= 0.9709 HSQC= C9
GA-H-6 / 2 4.945707 1*1*1 STAT=Y PRED= 4.760 RANGE= 0.247 WIDTH(Y)= 1.956 RESP(Y)= 0.9824 HSQC= C13
GA-H-7alpha / 2 2.027505 1*1*1 STAT=Y PRED= 2.025 RANGE= 0.472 WIDTH(Y)= 2.358 RESP(Y)= 0.8736 HSQC= C14
GA-H-8 / 2 1.710433 1*1*1 STAT=Y PRED= 1.700 RANGE= 0.222 WIDTH(Y)= 2.173 RESP(Y)= 0.9339 HSQC= C15
GA-H-10 / 2 4.941390 1*1*1 STAT=Y PRED= 4.165 RANGE= 0.392 WIDTH(Y)= 1.780 RESP(Y)= 0.9248 HSQC= C17
GA-H-12 / 2 6.023393 1*1*1 STAT=Y PRED= 5.659 RANGE= 0.335 WIDTH(Y)= 1.498 RESP(Y)= 0.9865 HSQC= C19
GA-H-14 / 2 2.937891 1*1*1 STAT=Y PRED= 2.949 RANGE= 0.387 WIDTH(Y)= 1.519 RESP(Y)= 0.9493 HSQC= C21
GA-H-16 / 2 1.117747 1*1*3 STAT=Y PRED= 1.114 RANGE= 0.252 WIDTH(Y)= 1.687 RESP(Y)= 0.9350 HSQC= C23
GA-t-but / 2 1.017131 1*1*9 STAT=Y PRED= 0.928 RANGE= 0.227 WIDTH(Y)= 2.491 RESP(Y)= 0.9025 HSQC= C25-27
GINKGOLIDE_B 2*SPIN= 1 SPECIES=1H POPULATION(Y)= 1.00000
GB-OH-3 / 3 6.471908 1*1*1 STAT=Y PRED= 4.913 RANGE= 1.733 WIDTH(Y)= 1.525 RESP(Y)= 1.0000
GB-OH-10 / 3 7.462874 1*1*1 STAT=Y PRED= 4.556 RANGE= 1.695 WIDTH(Y)= 1.929 RESP(Y)= 0.9612
GB-H-7beta / 3 2.137230 1*1*1 STAT=Y PRED= 2.036 RANGE= 0.560 WIDTH(Y)= 2.168 RESP(Y)= 0.9003 HSQC= C14
GB-H-1 / 3 4.042104 1*1*1 STAT=Y PRED= 3.762 RANGE= 0.100 WIDTH(Y)= 1.692 RESP(Y)= 0.9364 HSQC= C8
GB-H-2 / 3 4.642590 1*1*1 STAT=Y PRED= 4.089 RANGE= 0.187 WIDTH(Y)= 1.644 RESP(Y)= 0.9775 HSQC= C9
GB-H-6 / 3 5.303773 1*1*1 STAT=Y PRED= 4.895 RANGE= 0.237 WIDTH(Y)= 1.799 RESP(Y)= 0.9597 HSQC= C13
GB-H-7alpha / 3 1.931786 1*1*1 STAT=Y PRED= 2.041 RANGE= 0.477 WIDTH(Y)= 2.242 RESP(Y)= 0.8904 HSQC= C14
GB-H-8 / 3 1.724094 1*1*1 STAT=Y PRED= 1.670 RANGE= 0.215 WIDTH(Y)= 2.358 RESP(Y)= 0.9326 HSQC= C15
GB-H-10 / 3 5.019748 1*1*1 STAT=Y PRED= 4.165 RANGE= 0.380 WIDTH(Y)= 1.969 RESP(Y)= 0.9334 HSQC= C17
GB-H-12 / 3 6.074154 1*1*1 STAT=Y PRED= 5.659 RANGE= 0.330 WIDTH(Y)= 1.664 RESP(Y)= 0.9898 HSQC= C19
GB-H-14 / 3 2.843287 1*1*1 STAT=Y PRED= 2.949 RANGE= 0.367 WIDTH(Y)= 1.666 RESP(Y)= 0.9457 HSQC= C21
GB-H-16 / 3 1.106901 1*1*3 STAT=Y PRED= 1.102 RANGE= 0.382 WIDTH(Y)= 1.848 RESP(Y)= 0.9294 HSQC= C23
GB-t-butyl / 3 1.028434 1*1*9 STAT=Y PRED= 0.871 RANGE= 0.202 WIDTH(Y)= 2.590 RESP(Y)= 0.8997 HSQC= C25-27
GB-OH-1 / 3 4.918842 1*1*1 STAT=Y PRED= 6.248 RANGE= 2.488 WIDTH(Y)= 1.544 RESP(Y)= 0.9556
GINKGOLIDE_C 2*SPIN= 1 SPECIES=1H POPULATION(Y)= 1.00000
GC-OH-3 / 4 6.479066 1*1*1 STAT=Y PRED= 5.334 RANGE= 1.700 WIDTH(Y)= 1.736 RESP(Y)= 1.0000
GC-OH-10 / 4 7.538812 1*1*1 STAT=Y PRED= 4.347 RANGE= 1.768 WIDTH(Y)= 2.242 RESP(Y)= 0.9489
GC-OH-7 / 4 5.658435 1*1*1 STAT=Y PRED= 4.985 RANGE= 1.620 WIDTH(Y)= 1.944 RESP(Y)= 0.9704
GC-H-1beta / 4 3.986275 1*1*1 STAT=Y PRED= 4.316 RANGE= 0.100 WIDTH(Y)= 1.907 RESP(Y)= 0.9449 HSQC= C8
GC-H-2 / 4 4.626842 1*1*1 STAT=Y PRED= 4.089 RANGE= 0.170 WIDTH(Y)= 1.789 RESP(Y)= 0.9761 HSQC= C9
GC-H-6 / 4 4.966384 1*1*1 STAT=Y PRED= 4.852 RANGE= 0.122 WIDTH(Y)= 1.940 RESP(Y)= 0.9965 HSQC= C13
GC-H-7 / 4 4.053494 1*1*1 STAT=Y PRED= 4.559 RANGE= 0.317 WIDTH(Y)= 1.975 RESP(Y)= 0.9273 HSQC= C14
GC-H-8 / 4 1.551161 1*1*1 STAT=Y PRED= 1.808 RANGE= 0.222 WIDTH(Y)= 2.077 RESP(Y)= 0.9481 HSQC= C15
GC-H-10 / 4 4.998365 1*1*1 STAT=Y PRED= 4.165 RANGE= 0.367 WIDTH(Y)= 2.302 RESP(Y)= 0.9280 HSQC= C17
GC-H-12 / 4 6.099451 1*1*1 STAT=Y PRED= 5.659 RANGE= 0.325 WIDTH(Y)= 1.837 RESP(Y)= 0.9848 HSQC= C19
GC-H-14 / 4 2.813690 1*1*1 STAT=Y PRED= 2.949 RANGE= 0.342 WIDTH(Y)= 1.804 RESP(Y)= 0.9418 HSQC= C21
GC-H-16 / 4 1.107483 1*1*3 STAT=Y PRED= 1.103 RANGE= 0.377 WIDTH(Y)= 1.979 RESP(Y)= 0.8915 HSQC= C23
GC-t-butyl / 4 1.091336 1*1*9 STAT=Y PRED= 0.887 RANGE= 0.225 WIDTH(Y)= 2.733 RESP(Y)= 0.8975 HSQC= C25-27
GC-OH-1 / 4 4.971784 1*1*1 STAT=Y PRED= 5.998 RANGE= 1.965 WIDTH(Y)= 1.840 RESP(Y)= 0.8956
GINKGOLIDE_J 2*SPIN= 1 SPECIES=1H POPULATION(Y)= 1.00000
GJ-OH-3 / 5 6.393136 1*1*1 STAT=Y PRED= 4.925 RANGE= 1.775 WIDTH(Y)= 1.498 RESP(Y)= 1.0000
GJ-OH-10 / 5 6.908209 1*1*1 STAT=Y PRED= 4.324 RANGE= 1.710 WIDTH(Y)= 1.844 RESP(Y)= 0.9617
GJ-OH-7 / 5 5.545649 1*1*1 STAT=Y PRED= 4.759 RANGE= 1.580 WIDTH(Y)= 1.670 RESP(Y)= 0.9709
GJ-H-1beta / 5 1.752901 1*1*1 STAT=Y PRED= 1.338 RANGE= 0.287 WIDTH(Y)= 2.106 RESP(Y)= 0.9100 HSQC= C8
GJ-H-1alpha / 5 2.717097 1*1*1 STAT=Y PRED= 2.169 RANGE= 0.377 WIDTH(Y)= 2.200 RESP(Y)= 0.8989 HSQC= C8
GJ-H-2 / 5 4.832003 1*1*1 STAT=Y PRED= 4.895 RANGE= 0.232 WIDTH(Y)= 1.942 RESP(Y)= 0.9577 HSQC= C9
GJ-H-6 / 5 4.645476 1*1*1 STAT=Y PRED= 4.895 RANGE= 0.110 WIDTH(Y)= 1.872 RESP(Y)= 0.9688 HSQC= C13
GJ-H-7 / 5 4.171447 1*1*1 STAT=Y PRED= 4.559 RANGE= 0.325 WIDTH(Y)= 1.862 RESP(Y)= 0.9203 HSQC= C14
GJ-H-8 / 5 1.537556 1*1*1 STAT=Y PRED= 1.768 RANGE= 0.212 WIDTH(Y)= 1.979 RESP(Y)= 0.9531 HSQC= C15
GJ-H-10 / 5 4.928198 1*1*1 STAT=Y PRED= 4.165 RANGE= 0.390 WIDTH(Y)= 2.064 RESP(Y)= 0.9291 HSQC= C17
GJ-H-12 / 5 6.046780 1*1*1 STAT=Y PRED= 5.659 RANGE= 0.332 WIDTH(Y)= 1.684 RESP(Y)= 0.9761 HSQC= C19
GJ-H-14 / 5 2.906534 1*1*1 STAT=Y PRED= 2.949 RANGE= 0.362 WIDTH(Y)= 1.711 RESP(Y)= 0.9406 HSQC= C21
GJ-H-16 / 5 1.117886 1*1*3 STAT=Y PRED= 1.135 RANGE= 0.260 WIDTH(Y)= 1.906 RESP(Y)= 0.9293 HSQC= C23
GJ-t-butyl / 5 1.081520 1*1*9 STAT=Y PRED= 0.894 RANGE= 0.230 WIDTH(Y)= 2.587 RESP(Y)= 0.9000 HSQC= C25-27

```

QUERCETIN 2\*SPIN= 1 SPECIES=1H POPULATION(Y)= 1.00000

Q-H6 / 6 6.183050 1\*1\*1 STAT=Y PRED= 6.298 RANGE= 0.242 WIDTH(Y)= 1.416 RESP(Y)= 1.0000 HSQC= C2

Q-H8 / 6 6.403402 1\*1\*1 STAT=Y PRED= 6.461 RANGE= 0.172 WIDTH(Y)= 1.407 RESP(Y)= 0.9861 HSQC= C4

Q-OH7 / 6 10.783504 1\*1\*1 STAT=Y PRED= 10.896 RANGE= 1.000 WIDTH(Y)= 1.739 RESP(Y)= 0.9816

Q-OH5 / 6 12.494440 1\*1\*1 STAT=Y PRED= 13.379 RANGE= 0.850 WIDTH(Y)= 1.942 RESP(Y)= 0.9532

Q-H6' / 6 7.536549 1\*1\*1 STAT=Y PRED= 7.627 RANGE= 0.265 WIDTH(Y)= 1.496 RESP(Y)= 0.9718 HSQC= C14

Q-H5' / 6 6.880921 1\*1\*1 STAT=Y PRED= 6.929 RANGE= 0.197 WIDTH(Y)= 1.406 RESP(Y)= 0.9618 HSQC= C15

Q-H2' / 6 7.674662 1\*1\*1 STAT=Y PRED= 7.698 RANGE= 0.247 WIDTH(Y)= 1.416 RESP(Y)= 0.9741 HSQC= C18

Q-OH3' / 6 9.374357 1\*1\*1 STAT=Y PRED= 9.494 RANGE= 1.215 WIDTH(Y)= 1.780 RESP(Y)= 0.9566

Q-OH4' / 6 9.311783 1\*1\*1 STAT=Y PRED= 9.682 RANGE= 1.315 WIDTH(Y)= 2.880 RESP(Y)= 0.9305

Q-OH3 / 6 9.597692 1\*1\*1 STAT=Y PRED= 9.115 RANGE= 1.115 WIDTH(Y)= 2.732 RESP(Y)= 0.9341

KAEMPPFEROL 2\*SPIN= 1 SPECIES=1H POPULATION(Y)= 1.00000

H3'\_5' / 7 6.922821 1\*2\*1 STAT=Y PRED= 6.925 RANGE= 0.177 WIDTH(Y)= 1.511 RESP(Y)= 0.9770 HSQC= C15\_17

K-H6 / 7 6.186969 1\*1\*1 STAT=Y PRED= 6.295 RANGE= 0.252 WIDTH(Y)= 1.406 RESP(Y)= 1.0000 HSQC= C2

K-H8 / 7 6.435905 1\*1\*1 STAT=Y PRED= 6.468 RANGE= 0.172 WIDTH(Y)= 1.404 RESP(Y)= 0.9947 HSQC= C4

K-OH7 / 7 10.788285 1\*1\*1 STAT=Y PRED= 10.903 RANGE= 0.985 WIDTH(Y)= 17.150 RESP(Y)= 0.8071

K-OH5 / 7 12.484003 1\*1\*1 STAT=Y PRED= 13.446 RANGE= 0.850 WIDTH(Y)= 1.739 RESP(Y)= 0.9625

H2'\_6' / 7 8.041525 1\*2\*1 STAT=Y PRED= 8.080 RANGE= 0.252 WIDTH(Y)= 1.495 RESP(Y)= 0.9722 HSQC= C14\_18

K-OH4' / 7 9.408526 1\*1\*1 STAT=Y PRED= 9.807 RANGE= 1.500 WIDTH(Y)= 11.480 RESP(Y)= 0.8274

K-OH3 / 7 10.109684 1\*1\*1 STAT=Y PRED= 9.155 RANGE= 1.070 WIDTH(Y)= 11.760 RESP(Y)= 0.8250

ISORHAMNETIN 2\*SPIN= 1 SPECIES=1H POPULATION(Y)= 1.00000

I-H6 / 8 6.192379 1\*1\*1 STAT=Y PRED= 6.306 RANGE= 0.242 WIDTH(Y)= 1.456 RESP(Y)= 0.9979 HSQC= C2

I-H8 / 8 6.476736 1\*1\*1 STAT=Y PRED= 6.462 RANGE= 0.182 WIDTH(Y)= 1.446 RESP(Y)= 0.9882 HSQC= C4

I-OH7 / 8 10.773796 1\*1\*1 STAT=Y PRED= 10.912 RANGE= 1.015 WIDTH(Y)= 2.985 RESP(Y)= 0.9504

I-OH5 / 8 12.467391 1\*1\*1 STAT=Y PRED= 13.376 RANGE= 0.855 WIDTH(Y)= 1.433 RESP(Y)= 1.0000

I-H6' / 8 7.687450 1\*1\*1 STAT=Y PRED= 7.638 RANGE= 0.297 WIDTH(Y)= 1.538 RESP(Y)= 0.9733 HSQC= C14

I-H5' / 8 6.936966 1\*1\*1 STAT=Y PRED= 6.904 RANGE= 0.242 WIDTH(Y)= 1.475 RESP(Y)= 0.9759 HSQC= C15

I-H2' / 8 7.752072 1\*1\*1 STAT=Y PRED= 7.676 RANGE= 0.305 WIDTH(Y)= 1.697 RESP(Y)= 0.9921 HSQC= C18

I-OH4' / 8 9.445056 1\*1\*1 STAT=Y PRED= 9.712 RANGE= 0.752 WIDTH(Y)= 2.159 RESP(Y)= 0.9537

I-OH3 / 8 9.747292 1\*1\*1 STAT=Y PRED= 9.072 RANGE= 1.125 WIDTH(Y)= 2.173 RESP(Y)= 0.9713

I-Ome / 8 3.840464 1\*1\*3 STAT=Y PRED= 3.899 RANGE= 0.132 WIDTH(Y)= 1.727 RESP(Y)= 0.9945 HSQC= H20

RUTIN 2\*SPIN= 1 SPECIES=1H POPULATION(Y)= 1.00000

R-H6 / 9 6.190056 1\*1\*1 STAT=Y PRED= 6.412 RANGE= 0.305 WIDTH(Y)= 1.062 RESP(Y)= 0.9766 HSQC= C2

R-H8 / 9 6.380863 1\*1\*1 STAT=Y PRED= 6.581 RANGE= 0.362 WIDTH(Y)= 1.055 RESP(Y)= 0.9738 HSQC= C4

R-OH7 / 9 10.829194 1\*1\*1 STAT=Y PRED= 10.802 RANGE= 1.260 WIDTH(Y)= 6.056 RESP(Y)= 0.7582

R-OH5 / 9 12.599850 1\*1\*1 STAT=Y PRED= 13.831 RANGE= 0.985 WIDTH(Y)= 1.142 RESP(Y)= 1.0000

R-H6' / 9 7.537800 1\*1\*1 STAT=Y PRED= 7.839 RANGE= 0.327 WIDTH(Y)= 1.146 RESP(Y)= 0.9079 HSQC= C14

R-H5' / 9 6.836057 1\*1\*1 STAT=Y PRED= 7.028 RANGE= 0.445 WIDTH(Y)= 1.149 RESP(Y)= 0.9452 HSQC= C15

R-H2' / 9 7.525994 1\*1\*1 STAT=Y PRED= 7.813 RANGE= 0.392 WIDTH(Y)= 1.146 RESP(Y)= 0.9585 HSQC= C18

R-OH3' / 9 9.671753 1\*1\*1 STAT=Y PRED= 9.599 RANGE= 1.830 WIDTH(Y)= 9.146 RESP(Y)= 0.7385

R-OH4' / 9 9.182772 1\*1\*1 STAT=Y PRED= 9.443 RANGE= 1.775 WIDTH(Y)= 6.955 RESP(Y)= 0.7480

R-Glc-1 / 9 5.341488 1\*1\*1 STAT=Y PRED= 5.565 RANGE= 0.342 WIDTH(Y)= 1.356 RESP(Y)= 0.9078 HSQC= H21

R-Glc-2 / 9 3.219724 1\*1\*1 STAT=Y PRED= 3.526 RANGE= 0.200 WIDTH(Y)= 1.897 RESP(Y)= 0.9171 HSQC= C23

R-Glc-5 / 9 3.238384 1\*1\*1 STAT=Y PRED= 3.485 RANGE= 0.247 WIDTH(Y)= 2.050 RESP(Y)= 0.8314 HSQC= C25

R-Glc-3 / 9 3.204949 1\*1\*1 STAT=Y PRED= 3.317 RANGE= 0.155 WIDTH(Y)= 2.091 RESP(Y)= 0.8548 HSQC= C26

R-Glc-4 / 9 3.047931 1\*1\*1 STAT=Y PRED= 3.387 RANGE= 0.287 WIDTH(Y)= 2.008 RESP(Y)= 0.8374 HSQC= C27

R-OH-Glc-2 / 9 5.286398 1\*1\*1 STAT=Y PRED= 5.633 RANGE= 1.215 WIDTH(Y)= 1.765 RESP(Y)= 0.8978

R-Glc-6 / 9 3.281188 1\*1\*1 STAT=Y PRED= 3.351 RANGE= 0.450 WIDTH(Y)= 2.220 RESP(Y)= 0.8318 HSQC= C29

R-Glc-6' / 9 3.701113 1\*1\*1 STAT=Y PRED= 3.509 RANGE= 0.232 WIDTH(Y)= 2.257 RESP(Y)= 0.8536 HSQC= C29

R-OH-Glc-3 / 9 5.115871 1\*1\*1 STAT=Y PRED= 4.296 RANGE= 1.420 WIDTH(Y)= 2.048 RESP(Y)= 0.8798

R-OH-Glc-4 / 9 5.074713 1\*1\*1 STAT=Y PRED= 4.702 RANGE= 1.568 WIDTH(Y)= 2.000 RESP(Y)= 0.8679

R-Rh-1 / 9 4.376166 1\*1\*1 STAT=Y PRED= 4.453 RANGE= 0.300 WIDTH(Y)= 1.672 RESP(Y)= 0.9527 HSQC= C33

R-Rh-5 / 9 3.265194 1\*1\*1 STAT=Y PRED= 2.961 RANGE= 0.627 WIDTH(Y)= 1.684 RESP(Y)= 0.9335 HSQC= C36

R-Rh-Me / 9 0.987386 1\*1\*3 STAT=Y PRED= 0.586 RANGE= 0.262 WIDTH(Y)= 1.730 RESP(Y)= 0.8538 HSQC= C40

R-Rh-4 / 9 3.067177 1\*1\*1 STAT=Y PRED= 2.968 RANGE= 0.287 WIDTH(Y)= 3.477 RESP(Y)= 0.9349 HSQC= C37

R-Rh-2 / 9 3.383564 1\*1\*1 STAT=Y PRED= 3.609 RANGE= 0.242 WIDTH(Y)= 2.395 RESP(Y)= 0.9502 HSQC= C38

R-Rh-3 / 9 3.275197 1\*1\*1 STAT=Y PRED= 3.082 RANGE= 0.582 WIDTH(Y)= 2.131 RESP(Y)= 0.8779 HSQC= C39

R-OH-Rh-2 / 9 4.350559 1\*1\*1 STAT=Y PRED= 4.719 RANGE= 1.395 WIDTH(Y)= 4.049 RESP(Y)= 0.7880

R-OH-Rh-3 / 9 4.400478 1\*1\*1 STAT=Y PRED= 4.127 RANGE= 1.613 WIDTH(Y)= 3.183 RESP(Y)= 0.8379

R-OH-Rh-4 / 9 4.534535 1\*1\*1 STAT=Y PRED= 4.732 RANGE= 1.673 WIDTH(Y)= 10.065 RESP(Y)= 0.8554

COUPLING CONSTANTS (HZ) :

J1\_2 5.1195 J BB-OH-10 BB-H-10 STAT=Y PRED= 4.890 RANGE= 0.750

J3\_4 6.8503 J BB-H-7beta BB-H-6 STAT=Y PRED= 9.550 RANGE= 3.000

J3\_4 -13.3259 J BB-H-7beta BB-H-7alpha STAT=Y PRED= -12.140 RANGE= 1.000

J4\_5 7.0969 J BB-H-6 BB-H-7alpha STAT=Y PRED= 6.600 RANGE= 3.000

J6\_7 -18.1406 J BB-H-1beta BB-H-1alpha STAT=Y PRED= -15.860 RANGE= 2.000

J8\_9 5.1630 J GA-OH-10 GA-H-10 STAT=Y PRED= 5.140 RANGE= 0.750

J10\_11 0.6218 J GA-H-7beta GA-H-6 STAT=Y PRED= 1.070 RANGE= 2.000

J10\_12 -13.7046 J GA-H-7beta GA-H-7alpha STAT=Y PRED= -12.430 RANGE= 1.000

J10\_13 4.5778 J GA-H-7beta GA-H-8 STAT=Y PRED= 4.190 RANGE= 3.000

J14\_15 -15.1675 J GA-H-1beta GA-H-1alpha STAT=Y PRED= -12.310 RANGE= 1.000

J14\_16 8.2624 J GA-H-1beta GA-H-2 STAT=Y PRED= 8.810 RANGE= 3.000

J15\_16 7.2878 J GA-H-1alpha GA-H-2 STAT=Y PRED= 7.110 RANGE= 3.000

J11\_12 4.0483 J GA-H-6 GA-H-7alpha STAT=Y PRED= 4.830 RANGE= 3.000

J12\_13 14.3434 J GA-H-7alpha GA-H-8 STAT=Y PRED= 13.120 RANGE= 2.200

J17\_18 7.1931 J GA-H-14 GA-H-16 STAT=Y PRED= 6.640 RANGE= 0.250

J19\_20 5.5557 J GB-OH-10 GB-H-10 STAT=Y PRED= 5.110 RANGE= 0.750

J21\_22 0.8476 J GB-H-7beta GB-H-6 STAT=Y PRED= 1.140 RANGE= 2.200

J21\_23 -13.7414 J GB-H-7beta GB-H-7alpha STAT=Y PRED= -12.420 RANGE= 1.000

J21\_24 4.6463 J GB-H-7beta GB-H-8 STAT=Y PRED= 4.190 RANGE= 3.000

J25\_26 7.4027 J GB-H-1 GB-H-2 STAT=Y PRED= 7.800 RANGE= 3.000

J25\_27 3.5631 J GB-H-1 GB-OH-1 STAT=Y PRED= 3.950 RANGE= 0.750

J22\_23 4.1428 J GB-H-6 GB-H-7alpha STAT=Y PRED= 4.630 RANGE= 3.000

J23\_24 14.3540 J GB-H-7alpha GB-H-8 STAT=Y PRED= 13.130 RANGE= 2.200

J28\_29 7.0831 J GB-H-14 GB-H-16 STAT=Y PRED= 6.640 RANGE= 0.250



|        |          |               |             |        |               |              |
|--------|----------|---------------|-------------|--------|---------------|--------------|
| J30_31 | 5.6531   | J GC-OH-10    | GC-H-10     | STAT=Y | PRED= 4.950   | RANGE= 0.750 |
| J32_33 | 6.2720   | J GC-OH-7     | GC-H-7      | STAT=Y | PRED= 4.300   | RANGE= 0.500 |
| J34_35 | 7.2205   | J GC-H-lbeta  | GC-H-2      | STAT=Y | PRED= 7.910   | RANGE= 3.000 |
| J34_36 | 3.6847   | J GC-H-lbeta  | GC-OH-1     | STAT=Y | PRED= 4.300   | RANGE= 0.500 |
| J37_33 | 4.1999   | J GC-H-6      | GC-H-7      | STAT=Y | PRED= 4.670   | RANGE= 3.000 |
| J33_38 | 12.3964  | J GC-H-7      | GC-H-8      | STAT=Y | PRED= 11.070  | RANGE= 2.200 |
| J39_40 | 7.0914   | J GC-H-14     | GC-H-16     | STAT=Y | PRED= 6.640   | RANGE= 0.250 |
| J41_42 | 5.3487   | J GJ-OH-10    | GJ-H-10     | STAT=Y | PRED= 5.040   | RANGE= 0.750 |
| J43_44 | 6.8614   | J GJ-OH-7     | GJ-H-7      | STAT=Y | PRED= 4.300   | RANGE= 0.500 |
| J45_46 | -15.1380 | J GJ-H-lbeta  | GJ-H-lalpha | STAT=Y | PRED= -12.310 | RANGE= 1.000 |
| J45_48 | 8.1701   | J GJ-H-lbeta  | GJ-H-2      | STAT=Y | PRED= 9.280   | RANGE= 3.000 |
| J46_48 | 7.2493   | J GJ-H-lalpha | GJ-H-2      | STAT=Y | PRED= 7.040   | RANGE= 3.000 |
| J47_44 | 4.1855   | J GJ-H-6      | GJ-H-7      | STAT=Y | PRED= 4.830   | RANGE= 3.000 |
| J44_49 | 12.2977  | J GJ-H-7      | GJ-H-8      | STAT=Y | PRED= 11.060  | RANGE= 2.200 |
| J50_51 | 7.2044   | J GJ-H-14     | GJ-H-16     | STAT=Y | PRED= 6.640   | RANGE= 0.250 |
| J52_53 | 2.0315   | J Q-H6        | Q-H8        | STAT=Y | PRED= 2.110   | RANGE= 0.890 |
| J54_55 | 8.4728   | J Q-H6'       | Q-H5'       | STAT=Y | PRED= 8.380   | RANGE= 0.500 |
| J54_56 | 2.2019   | J Q-H6'       | Q-H2'       | STAT=Y | PRED= 2.080   | RANGE= 0.800 |
| J55_56 | 0.4659   | J Q-H5'       | Q-H2'       | STAT=Y | PRED= 0.460   | RANGE= 0.320 |
| J57_58 | 2.4778   | J H3'_5'      | H3'_5'      | STAT=Y | PRED= 2.710   | RANGE= 0.700 |
| J57_59 | 0.2690   | J H2'_6'      | H3'_5'      | STAT=Y | PRED= 0.460   | RANGE= 0.320 |
| J57_60 | 8.7801   | J H3'_5'      | H2'_6'      | STAT=Y | PRED= 8.530   | RANGE= 0.440 |
| J61_62 | 2.0325   | J K-H6        | K-H8        | STAT=Y | PRED= 2.110   | RANGE= 0.890 |
| J60_59 | 2.4747   | J H2'_6'      | H2'_6'      | STAT=Y | PRED= 2.380   | RANGE= 0.700 |
| J64_63 | 2.0139   | J I-H6        | I-H8        | STAT=Y | PRED= 2.110   | RANGE= 0.890 |
| J65_66 | 8.4712   | J I-H6'       | I-H5'       | STAT=Y | PRED= 8.340   | RANGE= 0.500 |
| J65_67 | 2.0570   | J I-H6'       | I-H2'       | STAT=Y | PRED= 2.080   | RANGE= 0.800 |
| J66_67 | 0.2967   | J I-H5'       | I-H2'       | STAT=Y | PRED= 0.460   | RANGE= 0.320 |
| J68_69 | 2.0571   | J R-H6        | R-H8        | STAT=Y | PRED= 2.110   | RANGE= 1.790 |
| J70_71 | 8.4604   | J R-H6'       | R-H5'       | STAT=Y | PRED= 8.380   | RANGE= 1.000 |
| J70_72 | 2.2300   | J R-H6'       | R-H2'       | STAT=Y | PRED= 2.080   | RANGE= 1.600 |
| J71_72 | 0.2251   | J R-H5'       | R-H2'       | STAT=Y | PRED= 0.460   | RANGE= 0.640 |
| J73_74 | 7.7199   | J R-Glc-1     | R-Glc-2     | STAT=Y | PRED= 7.190   | RANGE= 3.580 |
| J74_75 | 9.0266   | J R-Glc-2     | R-Glc-3     | STAT=Y | PRED= 8.920   | RANGE= 3.580 |
| J74_80 | 4.7130   | J R-Glc-2     | R-OH-Glc-2  | STAT=Y | PRED= 4.300   | RANGE= 1.000 |
| J77_76 | 9.8132   | J R-Glc-5     | R-Glc-4     | STAT=Y | PRED= 10.550  | RANGE= 2.560 |
| J77_78 | 6.9219   | J R-Glc-5     | R-Glc-6     | STAT=Y | PRED= 2.700   | RANGE= 3.000 |
| J77_79 | 1.7617   | J R-Glc-5     | R-Glc-6'    | STAT=Y | PRED= 1.280   | RANGE= 3.000 |
| J75_76 | 8.7207   | J R-Glc-3     | R-Glc-4     | STAT=Y | PRED= 9.140   | RANGE= 3.580 |
| J75_81 | 4.8865   | J R-Glc-3     | R-OH-Glc-3  | STAT=Y | PRED= 4.300   | RANGE= 1.000 |
| J76_82 | 5.8261   | J R-Glc-4     | R-OH-Glc-4  | STAT=Y | PRED= 4.300   | RANGE= 1.000 |
| J78_79 | -11.2374 | J R-Glc-6     | R-Glc-6'    | STAT=Y | PRED= -12.300 | RANGE= 0.800 |
| J83_84 | 1.5856   | J R-Rh-1      | R-Rh-2      | STAT=Y | PRED= 2.330   | RANGE= 2.800 |
| J87_88 | 6.2129   | J R-Rh-5      | R-Rh-Me     | STAT=Y | PRED= 6.250   | RANGE= 0.600 |
| J87_86 | 9.2814   | J R-Rh-5      | R-Rh-4      | STAT=Y | PRED= 9.940   | RANGE= 3.580 |
| J86_85 | 9.5011   | J R-Rh-4      | R-Rh-3      | STAT=Y | PRED= 9.590   | RANGE= 3.580 |
| J86_91 | 3.6210   | J R-Rh-4      | R-OH-Rh-4   | STAT=Y | PRED= 4.300   | RANGE= 1.000 |
| J84_85 | 3.0081   | J R-Rh-2      | R-Rh-3      | STAT=Y | PRED= 3.420   | RANGE= 3.800 |
| J84_89 | 4.0866   | J R-Rh-2      | R-OH-Rh-2   | STAT=Y | PRED= 4.440   | RANGE= 1.500 |
| J85_90 | 5.6937   | J R-Rh-3      | R-OH-Rh-3   | STAT=Y | PRED= 4.300   | RANGE= 1.000 |

CONTROL PARAMETERS:

Solvent = none (def. 99% enriched)  
1.000 = Concentration (vol%, def=1.0%)  
0.00100000 = Minimum line-intensity  
0.00100000 = Diagonalization criterium (not in use)  
8.04426687 = Left frequency (ppm)  
0.00000000 = Right frequency (ppm)  
10.000 = Acquisition time (s, for QMtls)  
1.505 = Line-width (for modes D, P & T, 0=use defaults)  
0.068609932 = Data-point resolution (Hz)  
25.060 = GAUSSIAN (% , 0=use default from INF)  
2.716 = Dispersion contribution (% , 0=use default from INF)  
0.00000000 = Decoupling frequency (for DORES)

CONSTRAINTS (in equations X0 = 1.0)...use no empty lines

END of FILE

**S29.** Calibration of residual solvent signals using primary reference standards of DMSO<sub>2</sub> and caffeine as internal calibrants. **(A)** qHNMR spectra of stock solutions of caffeine and DMSO<sub>2</sub> in DMSO-*d*<sub>6</sub> (600 MHz). **(B)** Calibration curves for the determination of residual DMSO-*d*<sub>5</sub> content in DMSO-*d*<sub>6</sub> lot B.

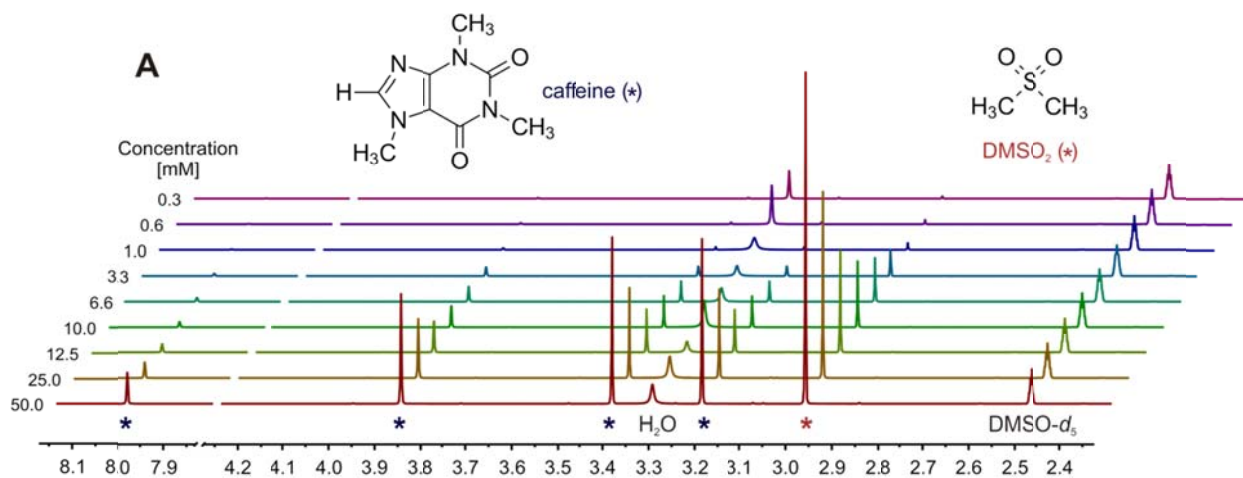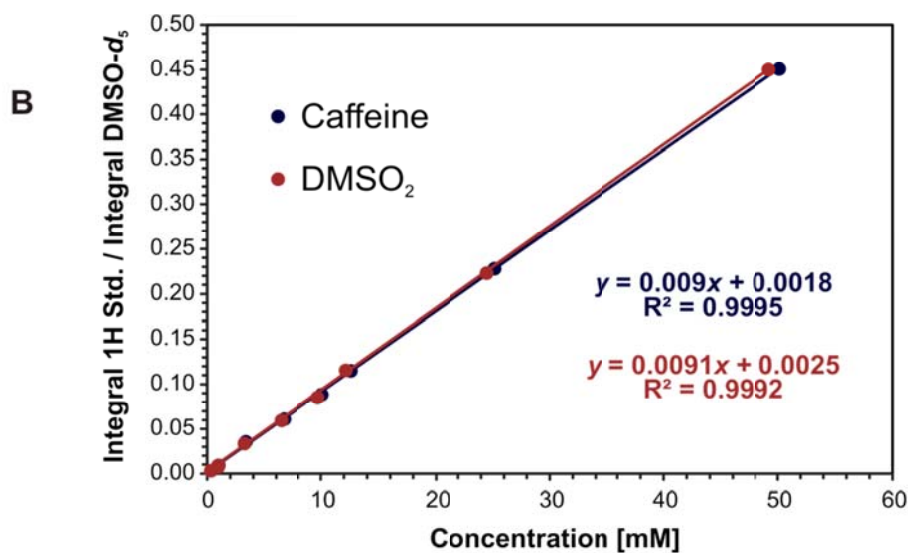

**S30.** The qHNMR analysis of a ginkgolide B reference material (DMSO- $d_6$ , 600 MHz). DMSO<sub>2</sub> was used as Internal Standard (IS) for quantitative calibration. Using qHNMR, ginkgolide A was readily detected as a very minor (0.43 %) impurity, present at an abundance level where intensities/integrals are comparable to those of <sup>13</sup>C satellite signals of the major component (see also reference #17 in the main text).

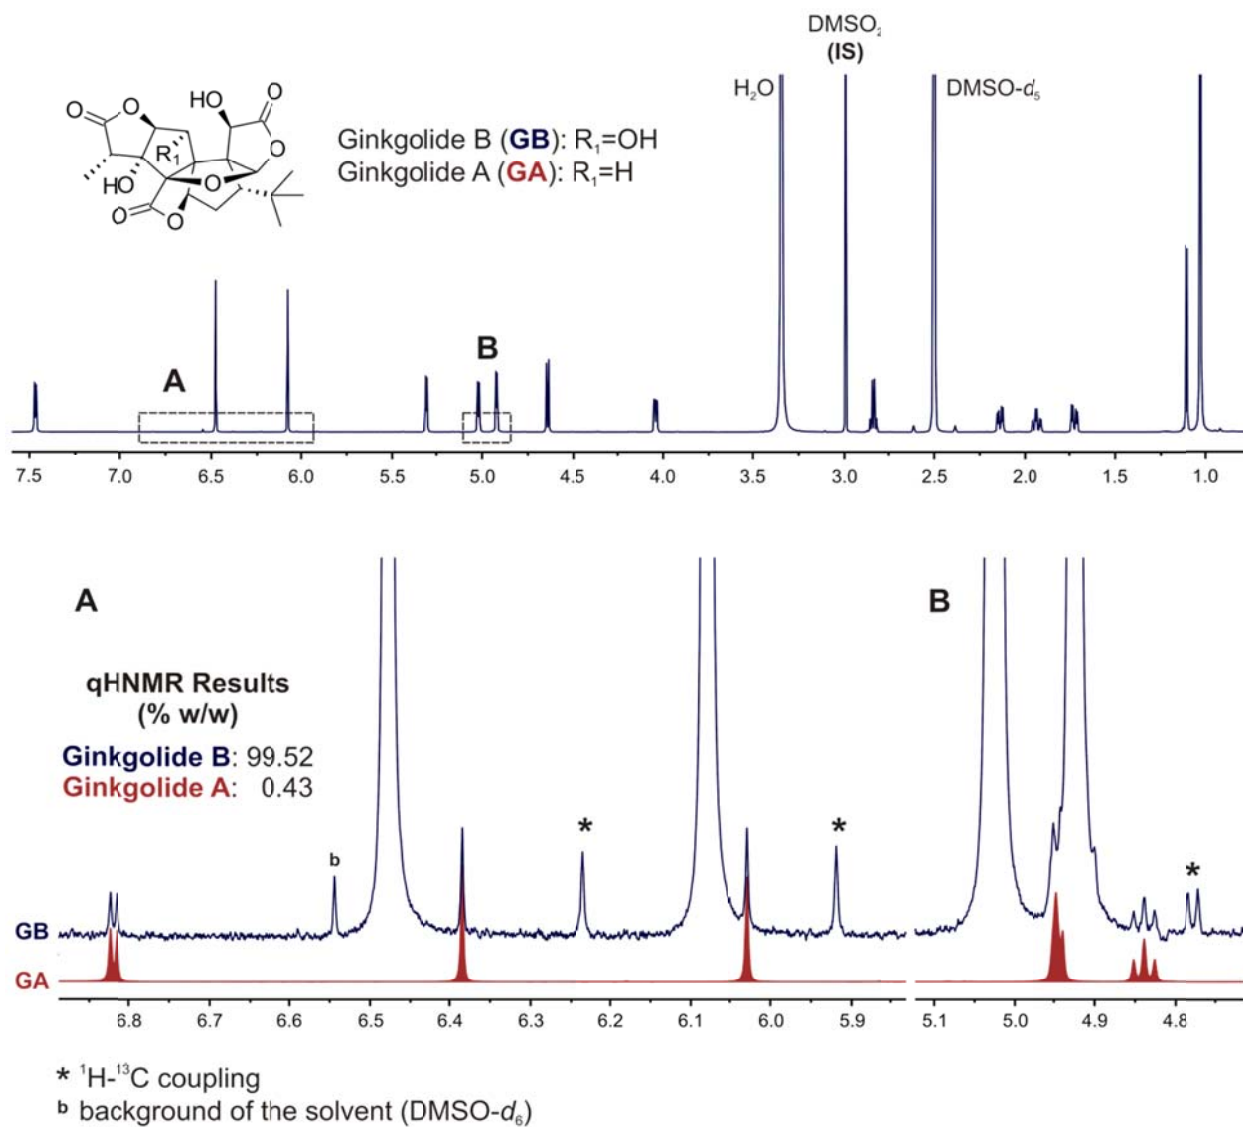

**S31.** (A) Weight percentage of compounds **1-9** in six Ginkgo samples according to qHNMR measurements. (B) Variability of selected botanical markers in commercially available *Ginkgo biloba* preparations, expressed as deviation (y-axis, in %) from the *average* percent content (set to 0% deviation, dotted line) of each of the compounds, **1-9**.

**A**

| <i>Ginkgo biloba</i> markers |      |      |      |      |      |      |       |                |       |
|------------------------------|------|------|------|------|------|------|-------|----------------|-------|
| concentration, % (w/w)       |      |      |      |      |      |      |       |                |       |
| sample                       | 1    | 2    | 3    | 4    | 5    | 6    | 7     | 8              | 9     |
| D50                          | 2.34 | 1.92 | 1.15 | 0.68 | 4.03 | 0.73 | 0.38  | ∅ <sup>a</sup> | 3.33  |
| D51                          | 2.70 | 1.60 | 1.32 | 0.93 | 3.95 | 0.52 | 0.31  | ∅              | 3.05  |
| D52                          | 1.14 | 0.81 | 1.54 | 0.68 | 2.60 | 0.96 | 0.23  | ∅              | 11.91 |
| D53                          | 1.74 | 0.77 | 1.76 | 1.12 | 2.85 | 7.14 | 0.37  | ∅              | 3.86  |
| D54                          | 0.06 | 0.09 | 0.13 | 0.04 | 0.36 | 0.02 | <0.01 | ∅              | 0.70  |
| D55                          | 0.07 | 0.09 | 0.14 | 0.03 | 0.36 | 0.04 | <0.01 | ∅              | 0.65  |

<sup>a</sup>∅ denotes values below the calculated limit of detection (LOD).

**B**

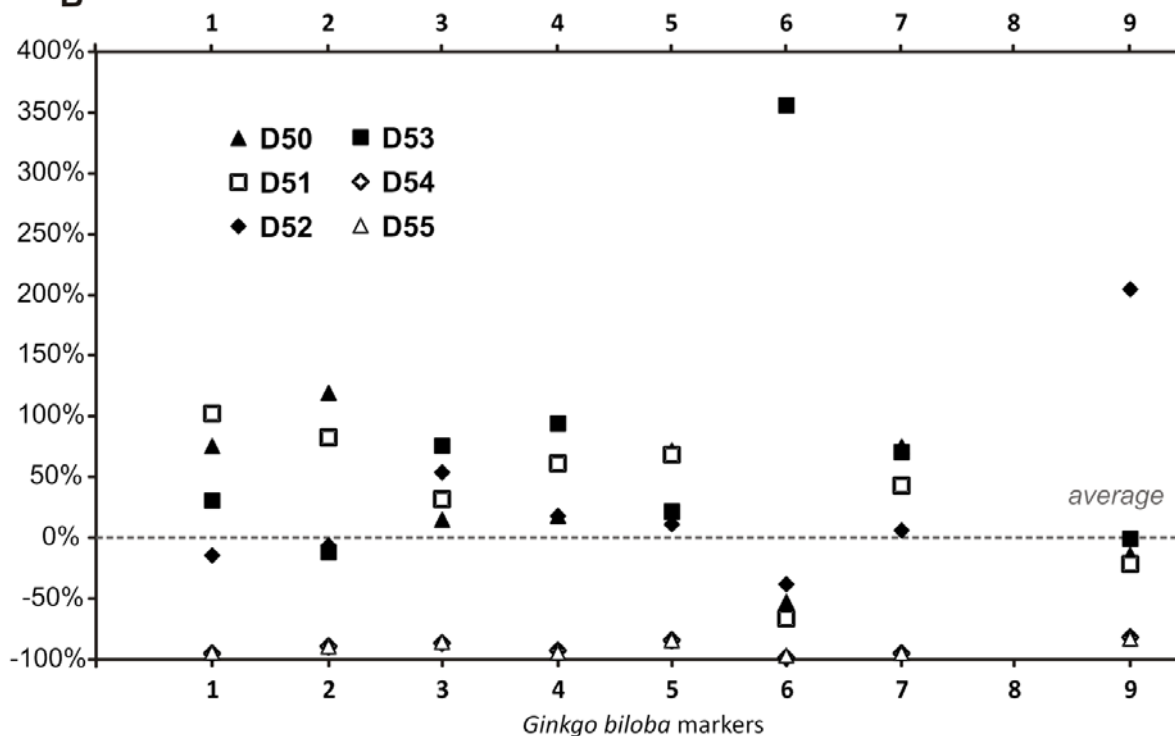

**S32.** The effect of random noise on iterative fitting with PERCH in qHNMR analysis. **(A)** Sections of the qHNMR spectra of caffeine (DMSO- $d_6$ , 600 MHz), showing the olefinic proton signals ( $\delta_H$  8.01 ppm). The six qHNMR spectra were acquired using a different number of scans to reach the indicated signal-to-noise ratio (S/N) values. **(B)** Fitting of the signals of the olefinic proton of caffeine at the various S/N levels shown in **A**: comparison of experimental (*Exp*) and calculated (*Calc*) qHNMR spectra. While the root mean square (RMS) deviations for the iterative fits increase with decreasing S/N, the errors always remain <0.1%, even at a S/N level of ~11:1.

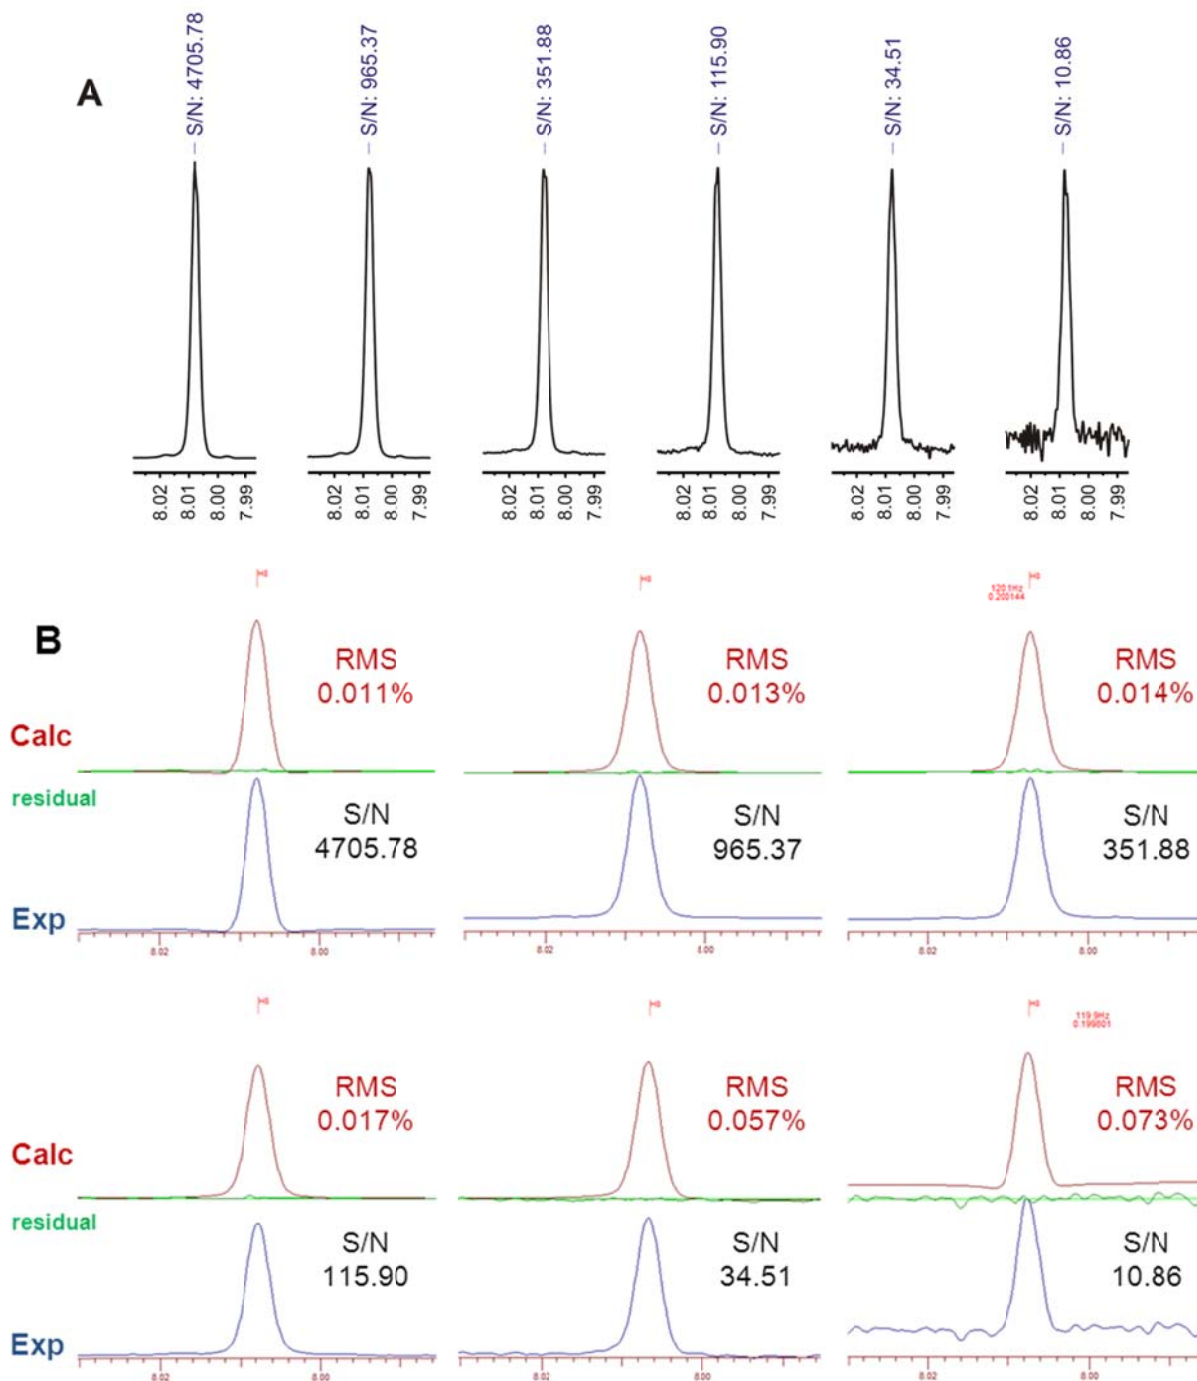

Supplement: NIHMS355331-supplement-Supporting_Information.pdf [file NIHMS355331-supplement-Supporting_Information.pdf]
